# Supplementary material for: A bioorthogonal chemical reporter for the detection and identification of protein lactylation
Source: PubMed Central journal article supplement — Chem Sci. 2022 Apr 26;13(20):6019–27. doi: 10.1039/d2sc00918h (PMC9132054; doi:10.1039/d2sc00918h), 2022-04-26

## Electronic Supplementary Information (ESI)

### A Bioorthogonal Chemical Reporter for the Detection and Identification of Protein Lactylation

Yanan Sun,<sup>†,#</sup> Yanchi Chen,<sup>†,#</sup> and Tao Peng<sup>\*,†,‡</sup>

<sup>†</sup> State Key Laboratory of Chemical Oncogenomics, Guangdong Provincial Key Laboratory of Chemical Genomics, School of Chemical Biology and Biotechnology, Peking University Shenzhen Graduate School, Shenzhen 518055, China

<sup>‡</sup> Shenzhen Bay Laboratory, Shenzhen 518132, China

<sup>#</sup> Y. S. and Y. C. contributed to this work equally.

\*Correspondence: [tpeng@pku.edu.cn](mailto:tpeng@pku.edu.cn)

## Table of Contents

|                                                                              |    |
|------------------------------------------------------------------------------|----|
| Experimental procedures .....                                                | 3  |
| General methods and materials.....                                           | 3  |
| Synthesis of L-lactate chemical reporters.....                               | 3  |
| Plasmids and cloning.....                                                    | 4  |
| Cell culture and transfection .....                                          | 5  |
| Metabolic labeling in mammalian cells with L-lactate chemical reporters..... | 5  |
| Preparation of cell lysates and core histones .....                          | 5  |
| CuAAC click reaction and in-gel fluorescence analysis.....                   | 6  |
| Fluorescence imaging.....                                                    | 6  |
| Pull-down and immunoprecipitation.....                                       | 7  |
| Detection of PARP1 auto-ADP-ribosylation.....                                | 7  |
| Western blotting.....                                                        | 8  |
| Chemoproteomic profiling of lactylated proteins.....                         | 8  |
| Bioinformatic analysis .....                                                 | 9  |
| Quantification and statistical analysis .....                                | 9  |
| Supplementary Figures .....                                                  | 10 |
| Supplementary Tables .....                                                   | 28 |
| References .....                                                             | 36 |
| NMR spectra .....                                                            | 37 |

## Experimental procedures

### General methods and materials

Unless otherwise noted, chemicals and solvents were obtained from Sigma-Aldrich or Bidepharm and were used directly as received without further purification. Chemical reactions were performed in oven-dried flasks under a N<sub>2</sub> atmosphere when necessary. TLC was conducted on silica gel 60 GF254 glass plates (Qingdao Haiyang Chemical Co., Ltd), and spots were visualized by staining with iodine (I<sub>2</sub>), potassium permanganate (KMnO<sub>4</sub>), or phosphomolybdic acid (PMA). Flash column chromatography was performed with silica gel (230-400 mesh, reagent grade) from Qingdao Haiyang Chemical Co., Ltd. <sup>1</sup>H and <sup>13</sup>C spectra were recorded in CDCl<sub>3</sub> or CD<sub>3</sub>OD at room temperature on Bruker Avance NMR Spectrometers operating at 300 or 400 MHz for <sup>1</sup>H. Chemical shifts are reported in δ ppm, and coupling constants (*J* values) are reported in Hz. <sup>1</sup>H NMR chemical shifts are calibrated using tetramethylsilane (TMS, δ = 0.00 ppm) in CDCl<sub>3</sub> as the internal standard or with the residual solvent peaks of CD<sub>3</sub>OD (δ = 3.31 ppm). <sup>13</sup>C NMR chemical shifts are calibrated with the residual solvent peaks of CDCl<sub>3</sub> (δ = 77.16 ppm) or CD<sub>3</sub>OD (δ = 49.00 ppm). High resolution ESI mass spectra were recorded with a Q Exactive Focus (ThermoFisher) mass spectrometer.

Azido-rhodamine and azido-biotin were synthesized in the lab according to literature.<sup>[1]</sup> Azido-DADPS-biotin was purchased from Click Chemistry Tools. PfuUltra High-Fidelity DNA polymerase was obtained from Agilent Technologies; restriction enzymes and dNTPs were obtained from New England Biolabs; oligonucleotide primers and gene fragments were synthesized by Tsingke. Plasmid DNA isolation was carried out with the Plasmid Mini Kit (Omega). Polyethylenimine (PEI) was purchased from Polysciences. Protease inhibitor cocktail was purchased from Roche (cOmplete ULTRA mini Tablets, EDTA-free). In-gel fluorescence and western blotting analyses were recorded on a Chemidoc MP imaging system (Biorad). Confocal fluorescence imaging was performed with a Nikon A1R confocal fluorescence microscope.

### Synthesis of L-lactate chemical reporters

#### Scheme S1. Synthesis of YnLac, YnLac-OMe, and YnLac-2

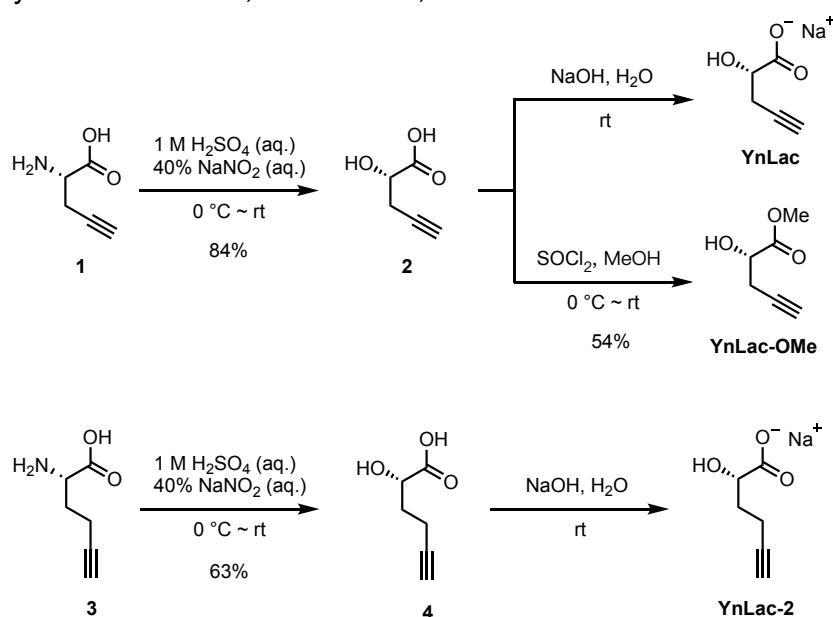

### **Synthesis of (S)-2-hydroxypent-4-ynoic acid (compound 2)**

To a solution of *L*-propargylglycine hydrochloride (**1**) (0.50 g, 3.35 mmol) in 1 M H<sub>2</sub>SO<sub>4</sub> (25 mL) was added 40% aqueous sodium nitrite (2.9 mL, 16.75 mmol) at -5 °C. The resulting reaction mixture was stirred at 0 °C for 2 h and then at room temperature for another 3 h. The reaction mixture was extracted with EtOAc (3 x 25 mL), and the organic phase was dried over anhydrous Na<sub>2</sub>SO<sub>4</sub> and evaporated under reduced pressure. The residue was purified by flash chromatography (eluent: EtOAc/MeOH = 4/1) to give compound **2** as a yellow oil (320 mg, 84% yield). <sup>1</sup>H NMR (300 MHz, CD<sub>3</sub>OD) δ 4.25 (t, *J* = 5.5 Hz, 1H), 2.70 – 2.53 (m, 2H), 2.31 (t, *J* = 2.6 Hz, 1H). <sup>13</sup>C NMR (75 MHz, CD<sub>3</sub>OD) δ 175.98, 80.43, 71.73, 70.28, 25.36. HRMS (ESI) calcd for C<sub>5</sub>H<sub>6</sub>O<sub>3</sub> [M-H]<sup>-</sup> 113.02442, found 113.02319.

### **Synthesis of methyl (S)-2-hydroxypent-4-ynoate (YnLac-OMe)**

To a solution of compound **2** (200 mg, 1.75 mmol) in MeOH (5 mL) was added SOCl<sub>2</sub> (0.5 mL) at 0 °C. The reaction mixture was stirred at room temperature for another 8 h and then concentrated under reduced pressure. The residue was purified by flash chromatography (eluent: petroleum ether/EtOAc = 2/1) to afford YnLac-OMe as a yellow oil (120 mg, 54% yield). <sup>1</sup>H NMR (300 MHz, CDCl<sub>3</sub>) δ 4.32 (d, *J* = 4.6 Hz, 1H), 3.79 (s, 3H), 3.23 (br, 1H), 2.76 – 2.58 (m, 2H), 2.05 (t, *J* = 2.6 Hz, 1H). <sup>13</sup>C NMR (75 MHz, CDCl<sub>3</sub>) δ 173.53, 78.64, 71.45, 68.85, 52.93, 24.87. HRMS (ESI) calcd for C<sub>6</sub>H<sub>8</sub>O<sub>3</sub>Na [M+Na]<sup>+</sup> 151.03657, found 151.03665.

### **Synthesis of (S)-2-hydroxyhex-5-ynoic acid (compound 4)**

To a solution of (S)-2-aminohex-5-ynoic acid hydrochloride (**3**) (163 mg, 1.0 mmol) in 1 M H<sub>2</sub>SO<sub>4</sub> (8 mL) was added 40% aqueous sodium nitrite (0.87 mL, 5 mmol) at -5 °C. The resulting reaction mixture was stirred at 0 °C for 2 h and then at room temperature for another 3 h. The reaction mixture was extracted with EtOAc (3 x 25 mL), and the organic phase was dried over Na<sub>2</sub>SO<sub>4</sub> and evaporated under reduced pressure. The residue was purified by flash chromatography (eluent: EtOAc/MeOH = 4/1) to give compound **4** as a yellow oil (80 mg, 63% yield). <sup>1</sup>H NMR (300 MHz, CD<sub>3</sub>OD) δ 4.23 (dd, *J* = 8.8, 3.9 Hz, 1H), 2.41 – 2.28 (m, 2H), 2.25 (t, *J* = 2.6 Hz, 1H), 2.04 – 1.92 (m, 1H), 1.85 – 1.73 (m, 1H). <sup>13</sup>C NMR (75 MHz, CD<sub>3</sub>OD) δ 177.53, 83.88, 70.09, 69.96, 34.46, 15.21. HRMS (ESI) calcd for C<sub>6</sub>H<sub>7</sub>O<sub>3</sub> [M-H]<sup>-</sup> 127.03897, found 127.03899.

### **Preparation of sodium (S)-2-hydroxypent-4-ynoate (YnLac) and sodium (S)-2-hydroxyhex-5-ynoate (YnLac-2)**

(S)-2-Hydroxypent-4-ynoic acid (compound **2**) or (S)-2-hydroxyhex-5-ynoic acid (compound **4**) was dissolved in ddH<sub>2</sub>O. Aqueous NaOH solution (1 equiv., ~0.1 M in ddH<sub>2</sub>O) was then added dropwise. The mixture was filtered through 0.45 μm membrane, frozen in liquid nitrogen, and lyophilized to provide YnLac or YnLac-2 as white powders.

### **Plasmids and cloning**

Full-length cDNAs encoding proteins of interest (PARP1, HMGB1, NOLC1, NCL, NUCKS1, PCNP, and DNAJC8) were purchased from WZ Biosciences and cloned into the pCMV-HA vector (Clontech). Site-directed mutagenesis was performed with QuikChange II Site-Directed Mutagenesis Kit (Agilent) with primers designed by Agilent Primer Design Program.

## Cell culture and transfection

HEK293T, HeLa, MCF-7, RAW264.7, MDA-MB-231, HepG2, and A549 cells were obtained from ATCC. PARP1 knockout HEK293T cell line was generated by Abcam (cat#ab266598) and verified in the lab. Cells were grown in DMEM (Dulbecco's modified Eagle's medium; Corning, cat#10-013-CVR) supplemented with 10% FBS (fetal bovine serum; Corning, cat#35-076-CV) at 37 °C in a humidified incubator with an atmosphere of 5% CO<sub>2</sub>. For transfection, cells were grown on cell culture dishes or plates to 70% confluence and transfected with indicated plasmids using PEI (Polysciences) at a ~2.5:1 ratio of transfection reagent/DNA in Opti-MEM media (ThermoFisher) for about 18-24 h.

## Metabolic labeling in mammalian cells with L-lactate chemical reporters

L-lactate chemical reporters (YnLac and YnLac-2) were dissolved in PBS to make the 2 M stock solutions. YnLac-OMe was dissolved in PBS to make the 0.2 M stock solution. For metabolic labeling of cellular proteins, cells were incubated with the chemical reporters at desired concentrations in DMEM supplemented with 10% FBS for indicated time periods at 37 °C. Generally, YnLac was incubated with cells at 20 mM concentration for 8 h, unless otherwise indicated. For cellular competition experiments, sodium L-lactate (Sigma, cat#71718) was dissolved in PBS to make the 20 M stock solution. Cells were pre-treated with sodium L-lactate at indicated concentrations for 4 h, and then co-incubated with the chemical reporters and sodium L-lactate at indicated concentrations in DMEM supplemented with 10% FBS for 8 h. For inhibition of p300-dependent protein labeling, HEK293T cells were either metabolically labeled with 10 mM YnLac for 6 h or pre-treated with 60 μM curcumin (MedChemExpress, cat#HY-N0005; 10 mM stock solution in DMSO) for 6 h then labeled with 10 mM YnLac for additional 6 h. For inhibition of histone deacetylases (HDACs) or sirtuins, HEK293T cells were labeled with 20 mM YnLac for 8 h and then treated with 0.4 μM trichostatin A (TSA; Cell Signaling Technology, cat#9950S; 50 mM stock solution in DMSO) or 10 mM nicotinamide (NAM; Sigma, cat#72340; 50 mM stock solution in ddH<sub>2</sub>O) for different time periods. Probe-labeled cells were harvested, washed with cold PBS, and flash-frozen in liquid nitrogen before stored at -80 °C.

## Preparation of cell lysates and core histones

For click reactions with azido-rhodamine in whole cell lysates, cell pellets were lysed in SDS lysis buffer (1% SDS, 150 mM NaCl, 50 mM HEPES, pH 7.4, supplemented with benzonase) with vigorous vortexing. The resulting lysate was centrifuged at 12,000g for 20 min to remove cellular debris.

For separation of the nuclear and cytoplasmic fractions,<sup>[2]</sup> cell pellets were lysed in ice-chilled Brij lysis buffer (1% Brij 97, 150 mM NaCl, 50 mM triethanolamine, pH 7.4, supplemented with EDTA-free protease inhibitor cocktail) with brief vortexing. The resulting cell lysates were centrifuged at 5,000g for 5 min at 4 °C and the supernatant was collected as the cytoplasmic fractions containing membrane and cytosolic proteins. The nuclear pellets were gently washed with the above lysis buffer without Brij 97 and further lysed with SDS lysis buffer (4% SDS, 150 mM NaCl, 50 mM triethanolamine, pH 7.4, supplemented with benzonase) as the nuclear fractions containing nuclear proteins. Both fractions were centrifuged at 12,000g for 20 min at room temperature to remove debris.

For extraction of core histones, a standard acid-extraction protocol was adapted.<sup>[3]</sup> The nuclear pellets were resuspended in 0.4 N H<sub>2</sub>SO<sub>4</sub> and shaken overnight on a rotator at 4 °C.

The nuclear debris was pelleted by centrifugation at 16000g for 10 min at 4 °C. The supernatant containing core histones was collected and then precipitated with MeOH at -80 °C overnight. Precipitated histone proteins were centrifuged at 16000g for 10 min at 4 °C and washed twice with ice-cold MeOH. Protein pellets were air-dried at room temperature and resuspended in ddH<sub>2</sub>O.

Protein concentrations were generally determined by the BCA assay (Pierce). Cell lysates were normalized with lysis buffer to equal protein concentrations.

### **CuAAC click reaction and in-gel fluorescence analysis**

Cell lysates (100 µg) were diluted with the corresponding lysis buffers to 89 µL, and then reacted with 11 µL freshly prepared click reaction cocktail containing azido-rhodamine (2 µL, 10 mM stock solution in DMSO), tris-(2-carboxyethyl)phosphine hydrochloride (TCEP, 2 µL, 50 mM freshly prepared stock solution in ddH<sub>2</sub>O), tris-[(1-benzyl-1H-1,2,3-triazol-4-yl)methyl]amine (TBTA, 5 µL, 10 mM stock solution in DMSO/t-butanol), and CuSO<sub>4</sub>·5H<sub>2</sub>O (2 µL, 50 mM freshly prepared stock solution in ddH<sub>2</sub>O) for 2 h at room temperature in the dark. The click reactions were terminated by addition of ice-cold methanol (500 µL), placed at -20 °C overnight, and then centrifuged at 20,000g for 15 min at 4 °C to precipitate the proteins. The supernatants were discarded and protein pellets were washed with ice-cold methanol twice and air-dried. The resulting protein pellets were resuspended with 35 µL of SDS lysis buffer (4% SDS, 150 mM NaCl, 50 mM triethanolamine, pH 7.4), and diluted with 12.5 µL 4X SDS-loading buffer (40% glycerol, 200 mM Tris-HCl pH 6.8, 8% SDS, 0.4% bromophenol blue) and 2.5 µL 2-mercaptoethanol. The resulting samples were heated for 5 min at 95 °C before loaded onto 4–20%, unless otherwise noted, ExpressPlus™ PAGE gels (Genscript) for SDS-PAGE separation. Generally, 20 µg of protein per gel lane is loaded for in-gel fluorescence visualization. For in-gel fluorescence, gels were scanned on a ChemiDoc MP Imager (Bio-Rad) with the rhodamine filter. After in-gel fluorescence scanning, gels were stained with Coomassie Brilliant Blue staining reagent.

### **Fluorescence imaging**

HeLa cells were cultured on sterilized coverslips and incubated with YnLac (20 mM, 2 M stock solution in PBS) in culture medium. The same volume of PBS was used as the vehicle control. After 12 h of labeling at 37°C, the cells were washed once with warmed PBS, fixed with 4% formaldehyde in PBS for 10 min at room temperature, and then washed twice with ice-cold PBS. Cells were permeabilized with 0.3% Triton X-100 in PBS for 10 min at room temperature, blocked with 3% BSA in PBS for 30min at room temperature, and washed with PBS (3 x 5 min with gentle agitation). The cells were then treated with a freshly premixed click reaction cocktail (50 µM azido-rhodamine, 1 mM TCEP, 100 µM TBTA, and 1 mM CuSO<sub>4</sub>·5H<sub>2</sub>O) in PBST (0.1% Tween-20 in PBS) for 1 h at room temperature. After gentle washes three times with 1% Tween-20 in PBS, cells were then stained with Hoechst 33342 (Beyotime, cat#C1029) and imaged on a Nikon A1R confocal fluorescence microscope. For Hoechst channel, the 405 nm laser was used as the excitation, and emission was collected between 425 nm to 475 nm. For rhodamine channel, the 561 nm laser was used as the excitation, and emission was collected between 570 nm to 620 nm.

## **Pull-down and immunoprecipitation**

For pull-down experiments, HEK293T cells were transfected with plasmids expressing HA-tagged proteins of interest for 18-24 h, metabolically labeled with YnLac (20 mM) for another 8 h, and harvested. Cell lysates were prepared in SDS lysis buffer (1% SDS, 150 mM NaCl, 50 mM HEPES, pH 7.4, supplemented with benzonase) with brief vortexing. Cell lysates (2~3 mg protein) were incubated with freshly prepared click reaction cocktail containing 100  $\mu$ M azido-biotin,<sup>[1]</sup> 1 mM TCEP, 100  $\mu$ M TBTA, and 1 mM CuSO<sub>4</sub>·5H<sub>2</sub>O at room temperature for 2 h in the dark. After protein precipitation and resuspension as described above, the biotinylated proteins were incubated with streptavidin agarose beads (ThermoFisher) at room temperature on a rotator for 2 h. The beads were washed six times with 1 mL of 1% SDS lysis buffer and the proteins were eluted with SDS-PAGE sample loading buffer (~30  $\mu$ L) containing 70% SDS buffer (4% SDS, 150 mM NaCl, 50 mM triethanolamine, pH 7.4), 25% 4X SDS-loading buffer, and 5% 2-mercaptoethanol after heating at 95 °C for 5 min. The supernatant (20  $\mu$ L per gel lane) was separated by SDS-PAGE for Western blotting analysis.

For immunoprecipitation experiments, HEK293T cells were transfected with plasmids expressing HA-tagged proteins of interest for 18-24 h and harvested. The cells were lysed with RIPA buffer (1% Triton X-100, 1% sodium deoxycholate, 0.1% SDS, 150 mM NaCl, 50 mM Tris, pH 7.4, supplemented with EDTA-free protease inhibitor cocktail) with vigorous vortexing. The resulting cell lysates were centrifuged at 12,000g for 15 min at 4 °C to remove cellular debris. Protein concentrations were determined by the BCA assay (Pierce). Equal amounts of cell lysates (~1 mg) were incubated with anti-HA agarose beads (ThermoFisher) on a rotator at 4 °C overnight. The beads were washed six times with 1 mL of chilled 1% Triton X-100 buffer and then resuspended in SDS-PAGE sample loading buffer (~30  $\mu$ L) with heating at 95 °C for 5 min. The supernatant (20  $\mu$ L per gel lane) was separated by SDS-PAGE for Western blotting analysis.

## **Detection of PARP1 auto-ADP-ribosylation**

PARP1 knockout HEK293T cells were transfected with plasmids expressing PARP1 or mutants for 18-24 h and incubated with sodium L-lactate (10 mM) for another 8 h. The cells were stimulated with 2 mM H<sub>2</sub>O<sub>2</sub> for 10 min and harvested. Cell lysates were prepared in SDS lysis buffer (4% SDS, 150 mM NaCl, 50 mM HEPES, pH 7.4) supplemented with 5  $\mu$ M olaparib (MedChemExpress, 10 mM stock solution in DMSO), 5  $\mu$ M PDD00017273 (MedChemExpress, 10 mM stock solution in DMSO), Roche protease inhibitor cocktail, and benzonase with brief vortexing and heating at 95 °C for 5 min. For Western blotting analysis on whole cell lysates, the protein concentrations were determined by the BCA assay (Pierce). The lysates (20  $\mu$ L per gel lane) was separated by SDS-PAGE. For immunoprecipitation, the whole cell lysates were diluted with 40 volumes of 1% Triton X-100 buffer (SDS level lower than 0.1%). The resulting cell lysates were centrifuged at 12,000g for 15 min at 4 °C to remove cellular debris. Protein concentrations were determined by the BCA assay (Pierce). HA-tagged PARP1 proteins were immunoprecipitated from ~1 mg of cell lysates using anti-HA agarose beads (ThermoFisher). After overnight incubation on a rotator at 4 °C, the beads were washed six times with 1 mL of chilled 1% Triton X-100 buffer. The proteins were eluted with SDS-PAGE sample loading buffer (~30  $\mu$ L) after heating at 95 °C for 5 min. The supernatant (20  $\mu$ L per gel lane) was separated by SDS-PAGE for Western blotting analysis using the antibody against ADP-ribosylation.

## Western blotting

Gels were transferred to nitrocellulose membranes using Bio-Rad Trans-Blot Turbo Transfer System (25 V, 30 min). The membranes were blocked with PBST (0.05% Tween-20 in PBS) containing 5% nonfat milk for 30 min at room temperature and then incubated with primary antibodies at 4 °C overnight. Membranes were washed with PBST three times, incubated with appropriate secondary antibodies, and developed using Bio-Rad Clarity Western ECL substrate. Membranes were imaged with a ChemiDoc MP Imager (Bio-Rad). Anti-HA-HRP conjugate (3F10, 1:1000 dilution) was purchased from Roche for anti-HA blots. Pan anti-lactyllysine (PTM-1401, 1:1000 dilution) was purchased from PTM Biolabs for anti-KIa blots. Anti-PARP1 (9532S, 1:1000 dilution) was purchased from Cell Signaling Technology. Anti-ADP-ribosylation (MABE1016, 1:1000 dilution) was purchased from Sigma. Goat anti-rabbit- and anti-mouse HRP secondary antibodies (1:10000 dilution) were purchased from Jackson ImmunoResearch Laboratories.

## Chemoproteomic profiling of lactylated proteins

HEK293T cells were treated with 20 mM YnLac for 8 h. The same concentration of L-lactate was used as the vehicle control. For both YnLac labeling and L-lactate control treatment, four biological replicates were performed in the proteomics analysis. Cells were harvested and lysed to separate the nuclear and cytoplasmic fractions as described above. Cell lysates from both fractions were centrifuged at 12,000g for 20 min to remove cellular debris. Protein concentrations were determined by the BCA assay (Pierce). The cell lysates (5 mg protein) were then clicked with acid cleavable azido-DADPS-biotin (Click Chemistry Tools, cat#1330) in the presence of TCEP, TBTA, and CuSO<sub>4</sub> as described above. Methanol-precipitated and washed protein pellets were again resuspended in 4% SDS buffer. Protein concentrations were determined and equal amounts of each protein sample were diluted 1/4 by volume with 50 mM triethanolamine buffer to 1% SDS (~1.6 mg/mL protein). Then prewashed streptavidin agarose beads (~50 µL slurry; ThermoFisher) were added to each sample. The protein and beads mixtures were incubated at room temperature on a nutating mixer for 1.5 h. The beads were then washed 4~6 times with 1% SDS (in PBS, pH 8) with rotation for 5 min and transferred into spin-columns (ThermoFisher). The beads were then washed with 5 M urea (50 mM Tris-HCl, pH 8), followed by washes with PBS (pH 7.4) and 100 mM ammonium bicarbonate (ABC) buffer. The beads were then transferred into new 1.5 mL centrifuge tubes and incubated with 10 mM DTT for 1 h, followed by treatment with 20 mM iodoacetamide for another 1 h in the dark. After that, the beads were washed with 100 mM ABC buffer and digested with 0.5 µg of trypsin (Promega) in ABC buffer (100 µL) at 37 °C overnight. The beads were again washed with ABC buffer and ddH<sub>2</sub>O. Finally, the beads were resuspended with 5% formic acid in ddH<sub>2</sub>O (100 µL) to cleave the DADPS linker. The elution was repeated twice and the supernatants were pooled and dried by SpeedVac for LC-MS/MS analysis.

LC-MS/MS analysis was performed with a Q Exactive HF-X Hybrid Quadrupole-Orbitrap mass spectrometer (ThermoFisher) coupled to an EASY-nLC 1200 system (ThermoFisher). The peptide samples were loaded onto an Acclaim PepMap RSLC C18 reverse-phase column (75 µm x 25 cm, nanoViper, C18, 2 µm, 100 Å; ThermoFisher). A 120-minute gradient increasing from 90% buffer A (water with 0.1% formic acid) and 10% buffer B (80% acetonitrile in water with 0.1% formic acid) to 45% buffer B in 30 minutes and to 95% buffer B in 70 minutes, and then keeping at 95% buffer B for 20 minutes was used at 0.3 µL/min for HPLC separation. The mass spectrometer was calibrated using Tune instrument



control software. Spray voltage was set to 2.1 kV, heated capillary at 320 °C, and funnel RF level at 40. The mass spectrometer was configured for data-dependent acquisition mode using the full MS/DD–MS/MS setup. All data were acquired in profile mode with positive polarity. Full MS resolution was set to 60,000 at m/z 200 and full MS automatic gain control (AGC) target was  $3 \times 10^6$  with a maximum IT of 50 ms. Mass range was set to 350–1800 m/z. MS2 resolution was set to 15,000 at m/z 200, AGC target value for MS2 at  $1 \times 10^5$ , and intensity threshold at  $2.2 \times 10^4$ . Isolation width was set at 1.6 m/z. A fixed first mass of 100 m/z was used. Normalized collision energy was set at 28%. Peptide match was set to preferred, and isotope exclusion was on. Precursor ions with unassigned, single, or six and higher charge states were excluded from fragmentation selection. The dynamic exclusion was set to 30 s.

Acquired MS raw files were analyzed by MaxQuant software v1.5.3.8<sup>[4]</sup> using the Andromeda search engine and searched against the human UniProt Reference Proteome without isoforms concatenated with common known contaminants. Enzyme specificity was set to trypsin, allowing maximum four missed cleavages. Carbamidomethylation of cysteine was set as a fixed modification, while methionine oxidation and *N*-terminal acetylation were set as variable modifications. For identification of lactylation sites, a variable modification on lysine residues ( $C_{11}H_{17}O_3N_3$ , + 239.12699 Da) was included. The first search peptide tolerance was set to 20 ppm, main search peptide tolerance to 4.5 ppm. The allowed fragment mass deviation was 20 ppm. Minimum length of peptides was set to seven amino acids, and maximum mass was set to 4,600 Da. The false discovery rates were set to 1% for peptide spectrum match, protein, and site decoy fraction levels. Minimum score and delta score for modified peptides were set to 40 and 6, respectively. Other parameters in MaxQuant were kept at default values.

The search results from MaxQuant on lactylation sites were analyzed with Perseus v1.6.10.0<sup>[5]</sup> and Microsoft Excel. Known contaminants, reverse hits, and hits only identified by site were removed. Lactylation sites that were identified in L-lactate control samples were assigned as false positives and removed. The MS/MS spectra of YnLac-modified peptides were generated by pFind<sup>[6]</sup>.

## Bioinformatic analysis

Post-translational modification (PTM), Gene ontology (GO), KEGG pathway, and REACTOME pathway enrichment analyses were performed using DAVID bioinformatics resources (<https://david-d.ncifcrf.gov/>, 2021 update).<sup>[7]</sup> PANTHER protein class analysis was performed in PANTHER (<http://www.pantherdb.org/>, version 16.0).<sup>[8]</sup> Sequence preference motif was generated by pLogo (<https://plogo.uconn.edu/>) using the human proteome as the background.<sup>[9]</sup> Analysis of other PTMs (acetylation, ubiquitination, and methylation) on lysine residues was performed using iPTMnet<sup>[10]</sup> (<https://research.bioinformatics.udel.edu/iptmnet/>) and PhosphositePlus<sup>[11]</sup> (<https://www.phosphosite.org/homeAction.action>).

## Quantification and statistical analysis

Data were presented as mean  $\pm$  standard deviation determined from biological replicates. The method for determining error bars and significance is indicated in the corresponding figure legends. Statistical analysis was performed with GraphPad Prism 9.

## Supplementary Figures

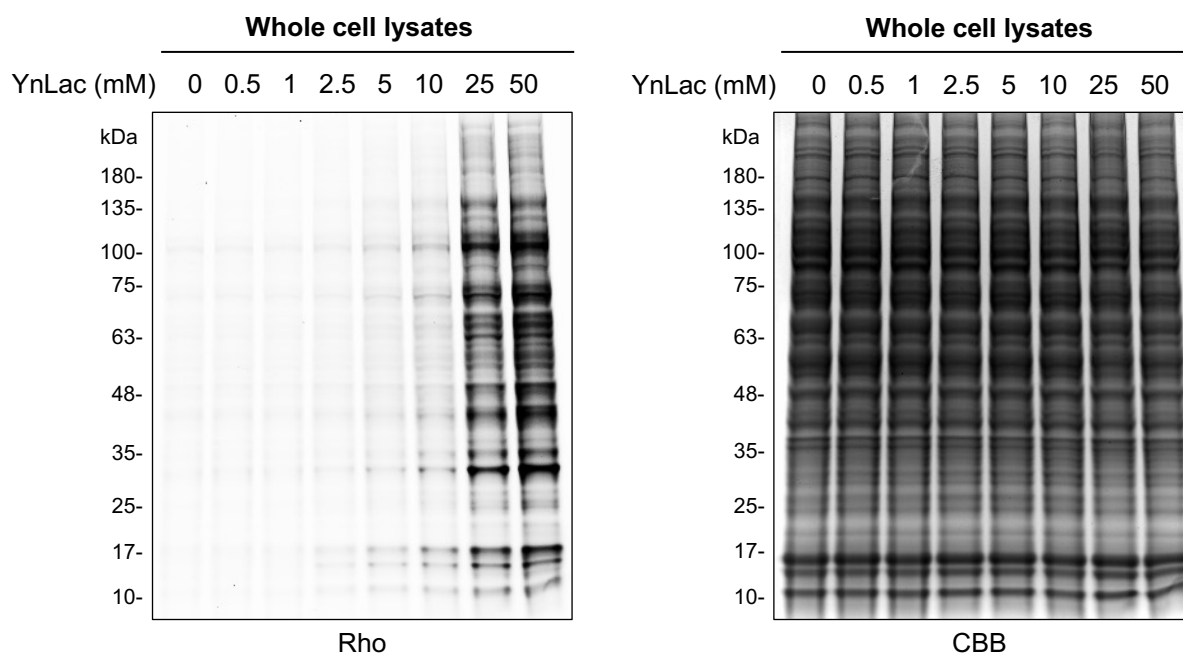

**Figure S1.** Concentration-dependent protein labeling by YnLac in live cells. HEK293T cells were incubated with YnLac at varying concentrations for 8 h and the whole cell lysates (lysed by SDS lysis buffer) were prepared for click reactions with az-rho and in-gel fluorescence analysis. “Rho” represents the rhodamine fluorescence channel. Coomassie brilliant blue (CBB) staining is included as protein loading control.

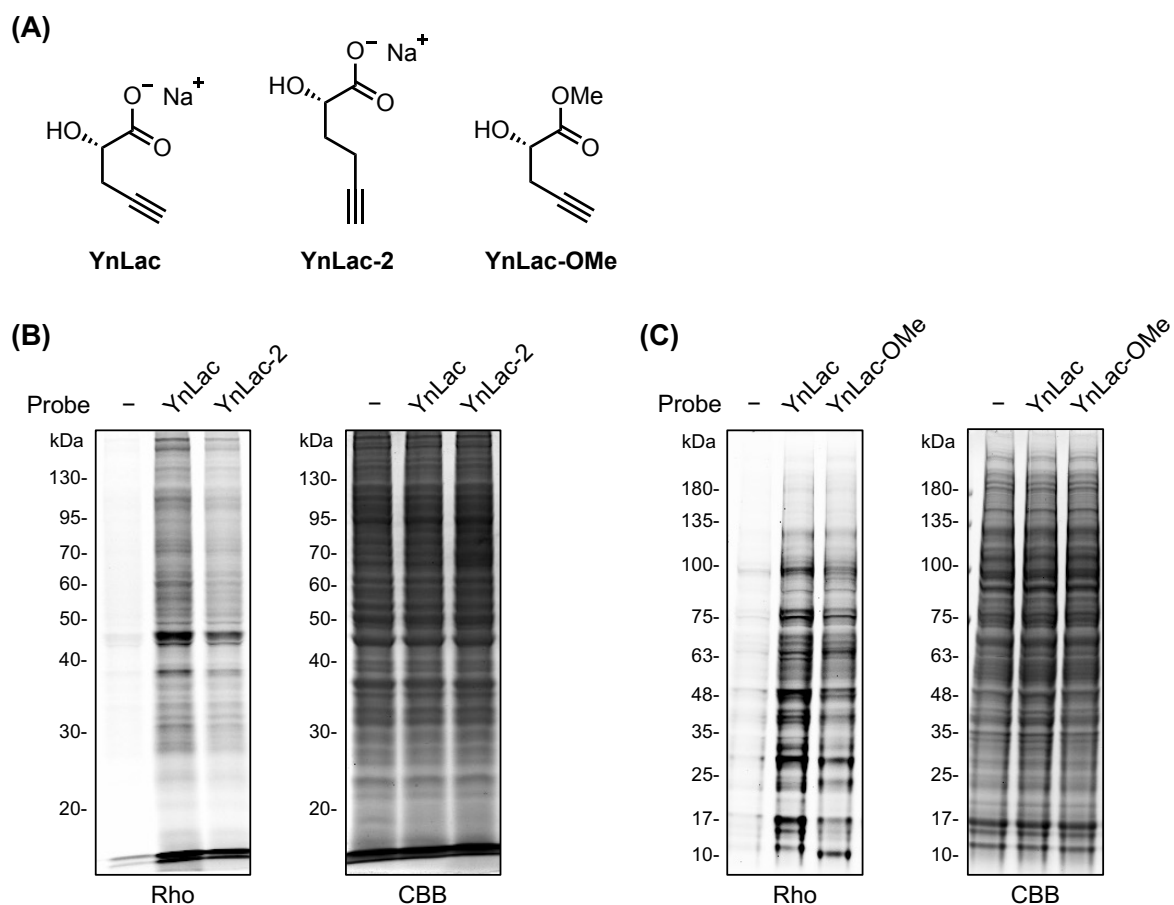

**Figure S2.** Investigation of L-lactate chemical reporters for metabolic labeling of proteins in live cells. (A) Structures of L-lactate chemical reporters. (B) Metabolic labeling of proteins with YnLac and YnLac-2. (C) Metabolic labeling of proteins with YnLac and YnLac-OMe. HEK293T cells were incubated with YnLac, YnLac-2, or YnLac-OMe at 10 mM concentrations for 8 h and lysed for click reactions with az-rho and in-gel fluorescence analysis. “Rho” represents the rhodamine fluorescence channel. Coomassie brilliant blue (CBB) staining is included as protein loading control. Note: A 10% acrylamide gel was used for (B), whereas a 4–20% gel was used for (C).

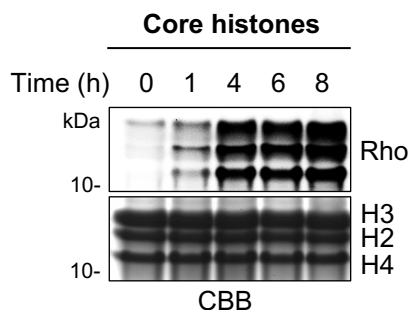

**Figure S3.** Time-dependent labeling of core histones by YnLac. HEK293T cells were incubated with YnLac at 20 mM for indicated time periods and the core histones were extracted for click reactions with az-rho and in-gel fluorescence analysis. “Rho” represents the rhodamine fluorescence channel. Coomassie brilliant blue (CBB) staining is included as protein loading control.

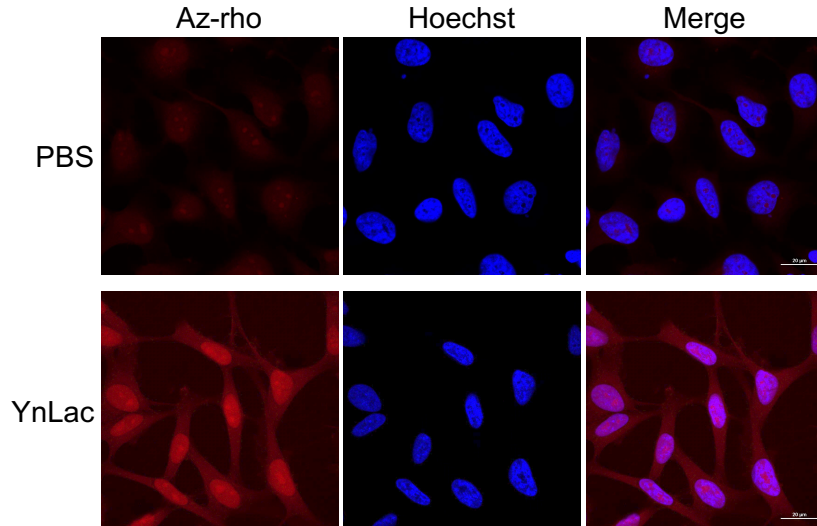

**Figure S4.** Fluorescence imaging of YnLac-labeled proteins in HeLa cells. Cells were incubated with YnLac (20 mM) for 12 h, fixed, and permeabilized for click reactions with az-rho and confocal fluorescence imaging. Hoechst 33342 was used for nuclear staining. Scale bars represent 20  $\mu$ m.

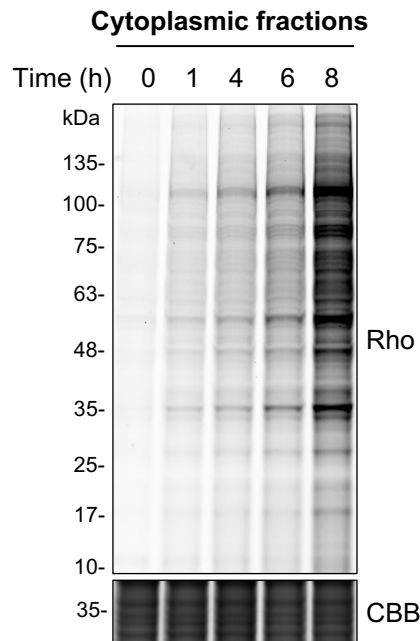

**Figure S5.** Time-dependent labeling of cytoplasmic proteins by YnLac. HEK293T cells were incubated with YnLac at 20 mM for indicated time periods and the cytoplasmic fractions were prepared for click reactions with az-rho and in-gel fluorescence analysis. “Rho” represents the rhodamine fluorescence channel. Coomassie brilliant blue (CBB) staining is included as protein loading control.

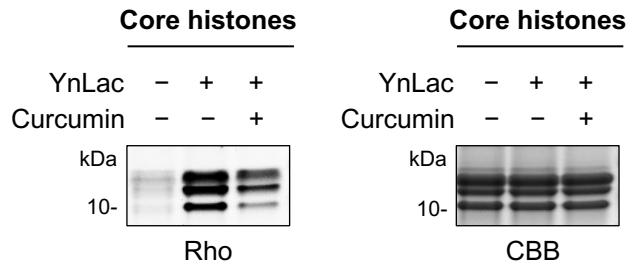

**Figure S6.** Metabolic labeling of core histones by YnLac in the presence of p300 inhibitor curcumin. HEK293T cells were pre-treated with 60  $\mu$ M curcumin for 6 h then labeled with 10 mM YnLac for additional 6 h. Cells were lysed to separate the core histones for click reactions with az-rho and in-gel fluorescence analysis. “Rho” represents the rhodamine fluorescence channel. Coomassie brilliant blue (CBB) staining is included as protein loading control.

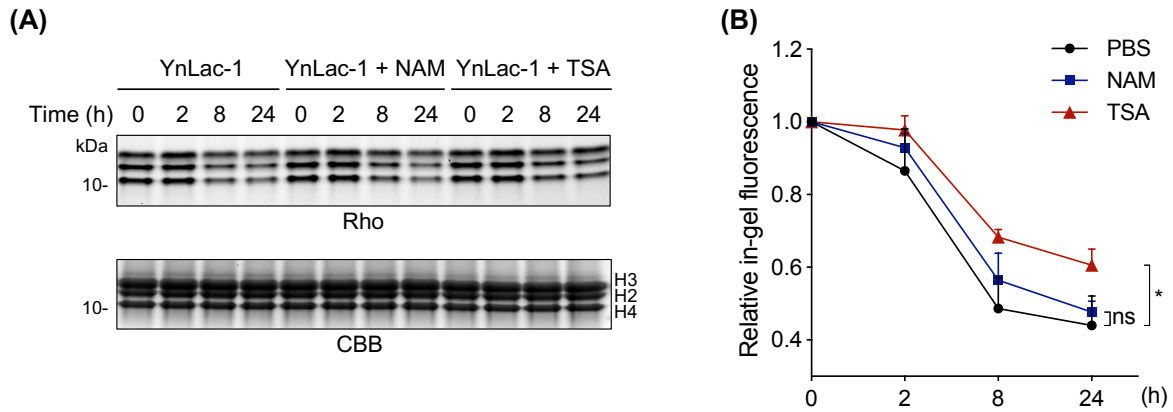

**Figure S7.** Analysis of the turn-over of YnLac protein labeling in the presence of deacetylase inhibitors. (A) In-gel fluorescence analysis of YnLac protein labeling in the presence of TSA or NAM. (B) Quantification of relative rhodamine fluorescence in (A). Fluorescence intensities of histone bands were quantified and normalized to the CBB intensities. Data are represented as mean  $\pm$  s.d.,  $n = 3$ , and \* indicates a p-value  $< 0.05$ , calculated by one-way ANOVA. HEK293T cells were labeled with 20 mM YnLac for 4 h and then treated with 0.4  $\mu$ M TSA or 10 mM NAM for indicated periods. Cells were lysed to separate the core histones for click reactions with az-rho and in-gel fluorescence analysis. “Rho” represents the rhodamine fluorescence channel. Coomassie brilliant blue (CBB) staining is included as protein loading control.

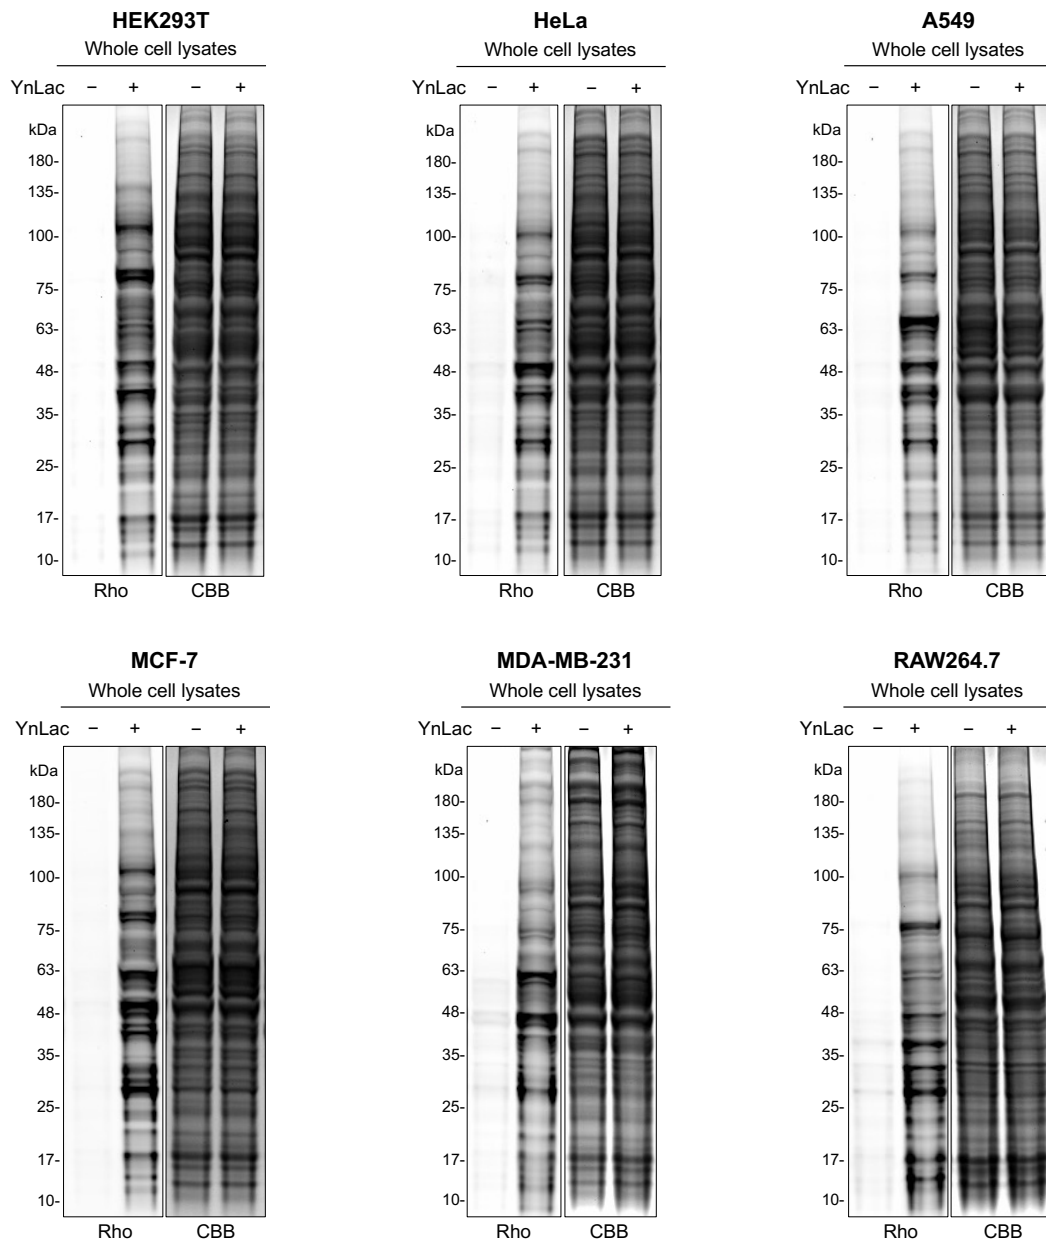

**Figure S8.** Metabolic labeling of proteins by YnLac in different cell types. Cells were incubated with YnLac (20 mM) for 8 h and the whole cell lysates were prepared for click reactions with az-rho and in-gel fluorescence analysis. “Rho” represents the rhodamine fluorescence channel. Coomassie brilliant blue (CBB) staining is included as protein loading control.

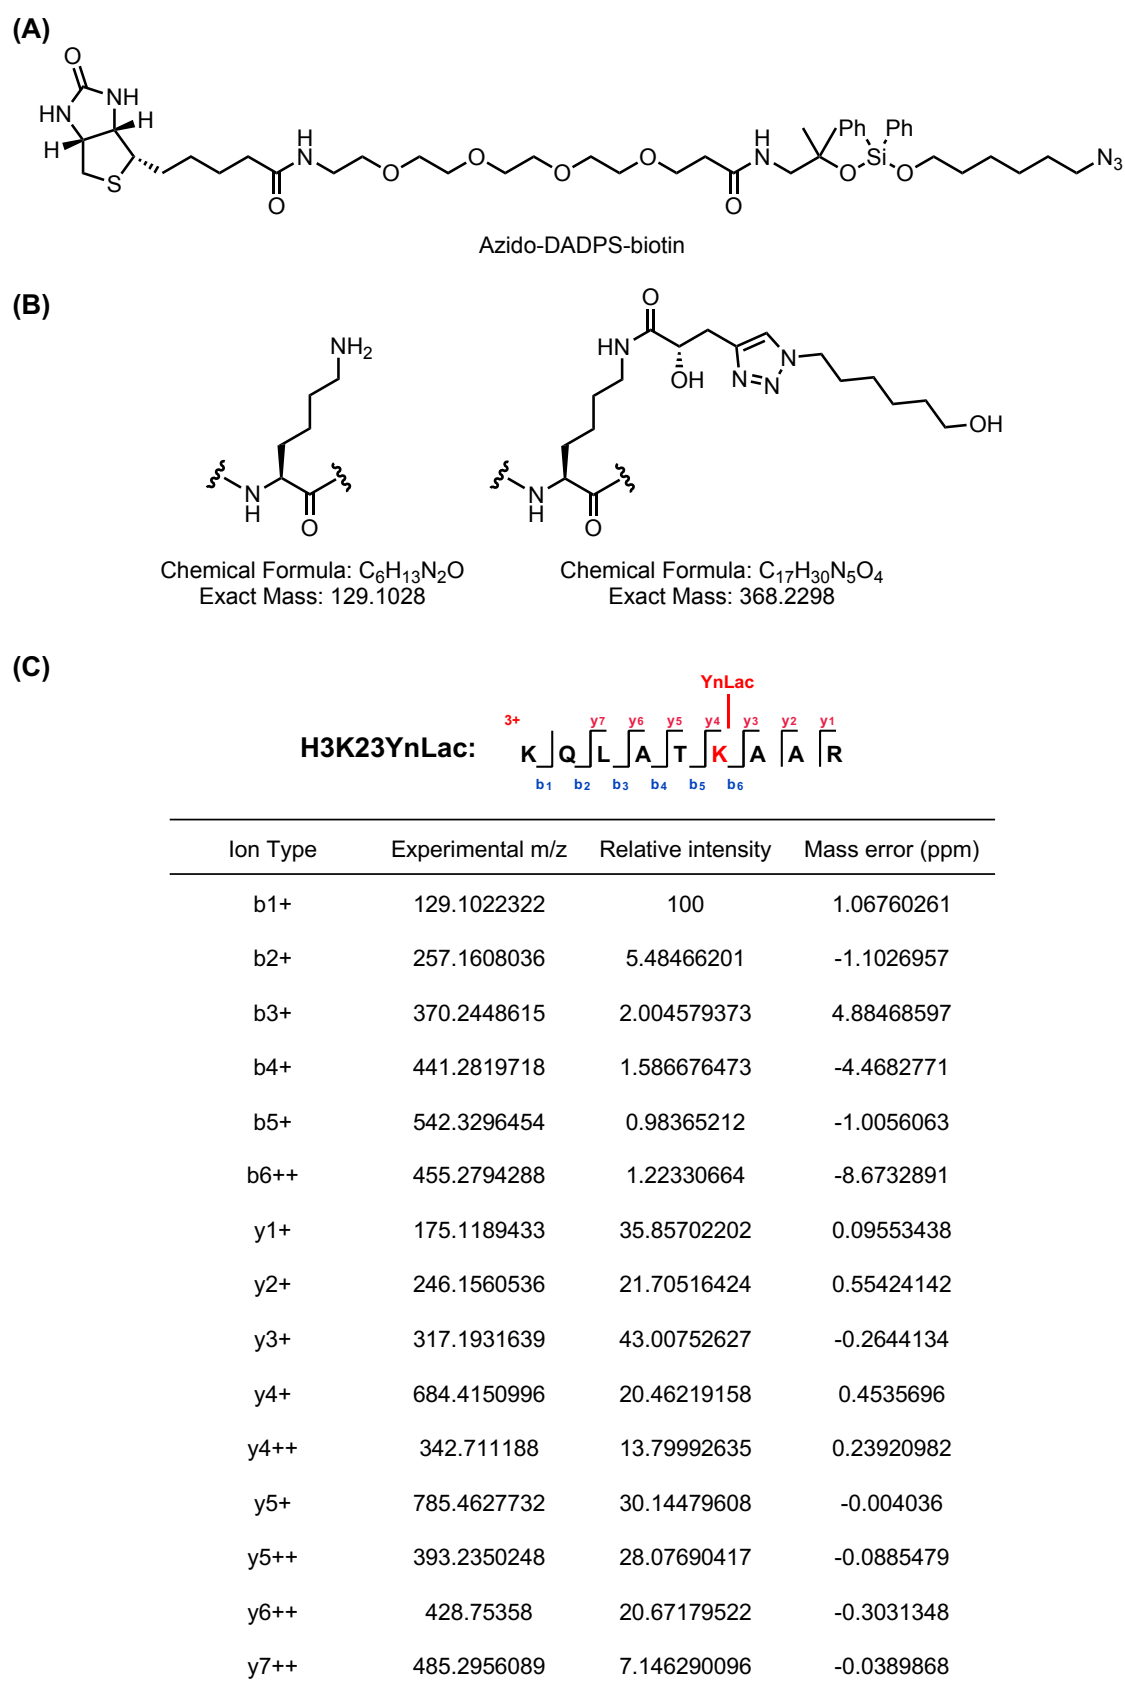

**Figure S9.** Proteomic analysis of lactylation sites. (A) Structure of the acid cleavable azido-DADPS-biotin.<sup>[12]</sup> (B) Structure and molecular mass of the fragment left on the YnLac-labeled lysine residue following click reaction and acid cleavage. (C) Summary of the assigned MS/MS fragment ion peaks of the H3K23YnLac peptide shown in Figure 3B.





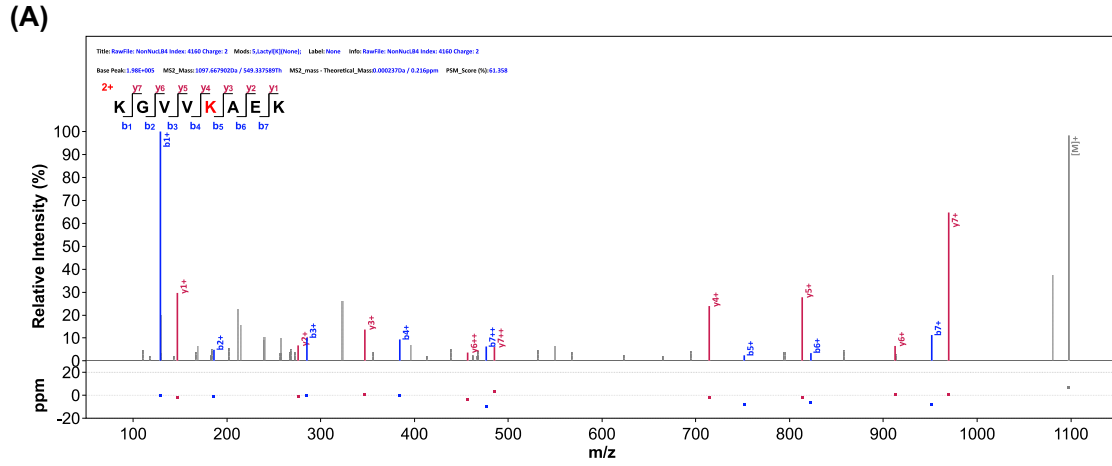

(B)

| Ion Type | Experimental m/z | Ion Type | Experimental m/z |
|----------|------------------|----------|------------------|
| b1+      | 129.1022         | y1+      | 147.1128         |
| b2+      | 186.1237         | y2+      | 276.1554         |
| b3+      | 285.1921         | y3+      | 347.1925         |
| b4+      | 384.2605         | y4+      | 714.4144         |
| b5+      | 751.4824         | y5+      | 813.4828         |
| b6+      | 822.5196         | y6+      | 912.5512         |
| b7+      | 951.5621         | y7+      | 969.5727         |
| b7++     | 476.2847         | y6++     | 456.7793         |
|          |                  | y7++     | 485.2900         |

**Figure S11.** MS/MS analysis of a representative YnLac-modified peptide from HMGB1. (A) The MS/MS peptide spectrum showing the identification of YnLac modification on the K177 residue (in red) of HMGB1. (B) Summary of the assigned MS/MS fragment ion peaks of the YnLac-modified HMGB1 peptide shown in (A).

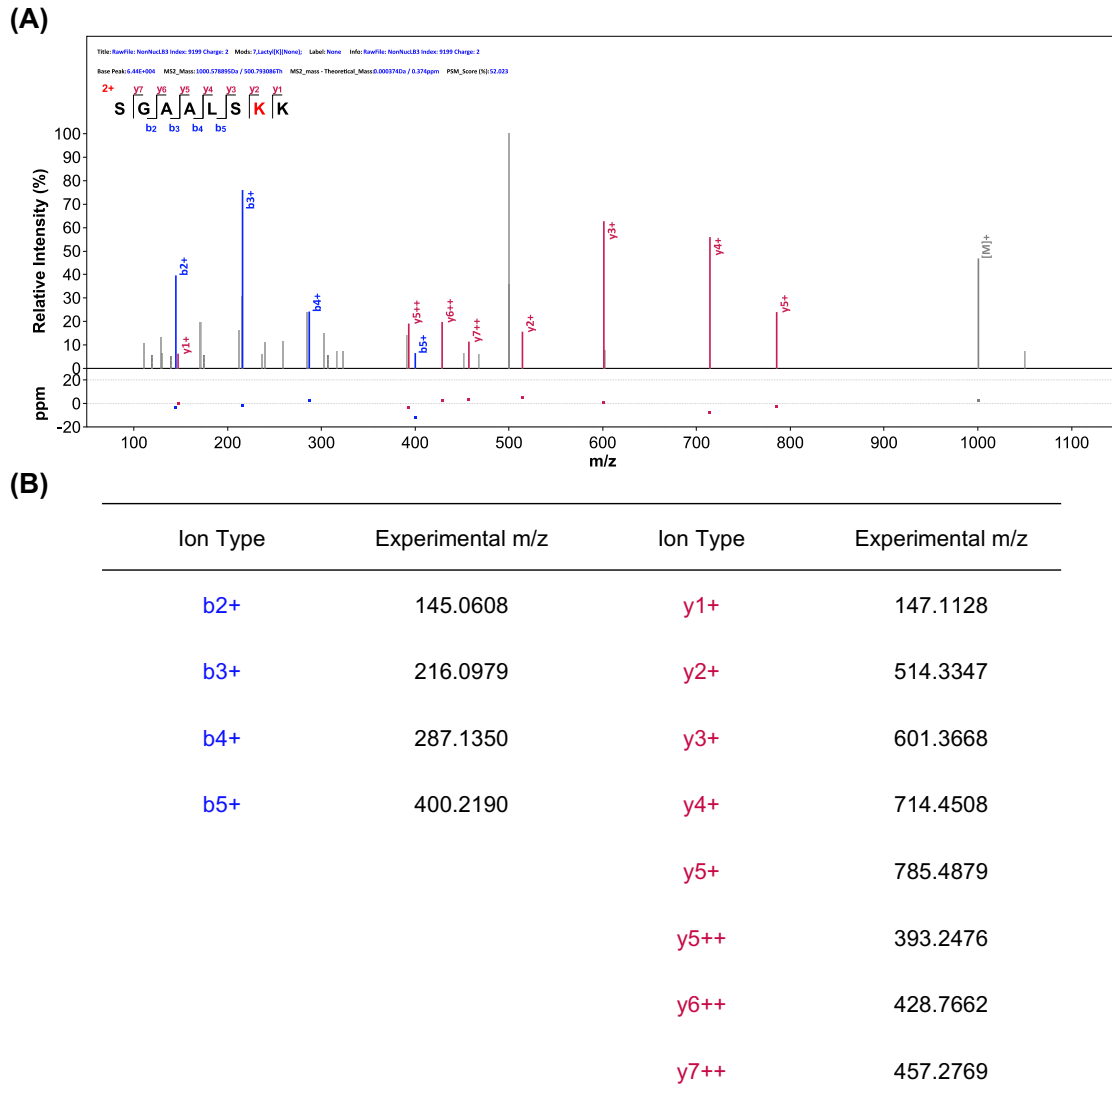

**Figure S12.** MS/MS analysis of a representative YnLac-modified peptide from PARP1. (A) The MS/MS peptide spectrum showing the identification of YnLac modification on the K505 residue (in red) of PARP1. (B) Summary of the assigned MS/MS fragment ion peaks of the YnLac-modified PARP1 peptide shown in (A).

**(A)**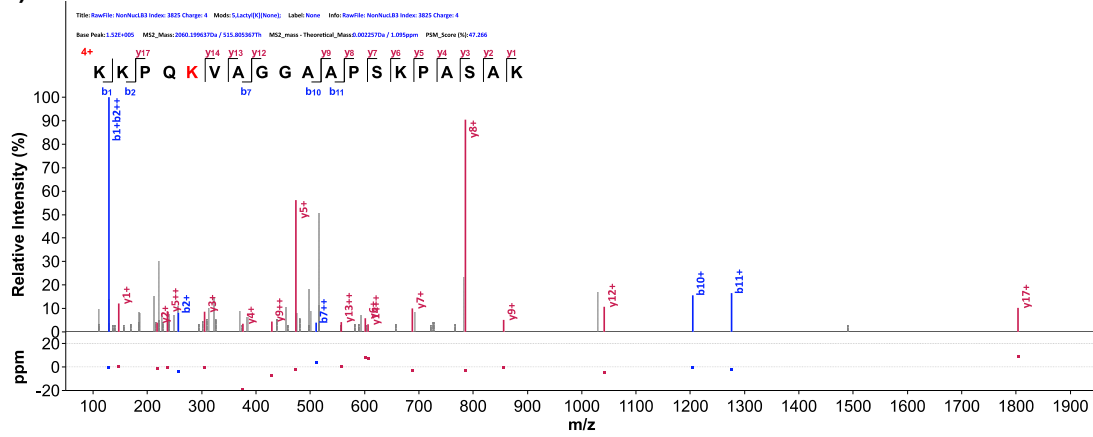**(B)**

| Ion Type | Experimental m/z | Ion Type | Experimental m/z |
|----------|------------------|----------|------------------|
| b1+      | 129.1022         | y1+      | 147.1128         |
| b2+      | 257.1972         | y2+      | 218.1499         |
| b10+     | 1204.7160        | y3+      | 305.1819         |
| b11+     | 1275.7531        | y4+      | 376.2190         |
| b2++     | 129.1022         | y5+      | 473.2718         |
| b7++     | 510.3216         | y6+      | 601.3668         |
|          |                  | y7+      | 688.3988         |
|          |                  | y8+      | 785.4515         |
|          |                  | y9+      | 856.4887         |
|          |                  | y12+     | 1041.5687        |
|          |                  | y17+     | 1804.0075        |
|          |                  | y5++     | 237.1395         |
|          |                  | y9++     | 428.7480         |
|          |                  | y13++    | 556.8065         |
|          |                  | y14++    | 606.3407         |

**Figure S13.** MS/MS analysis of a representative YnLac-modified peptide from NOLC1. (A) The MS/MS peptide spectrum showing the identification of YnLac modification on the K96 residue (in red) of NOLC1. (B) Summary of the assigned MS/MS fragment ion peaks of the YnLac-modified NOLC1 peptide shown in (A).

**(A)**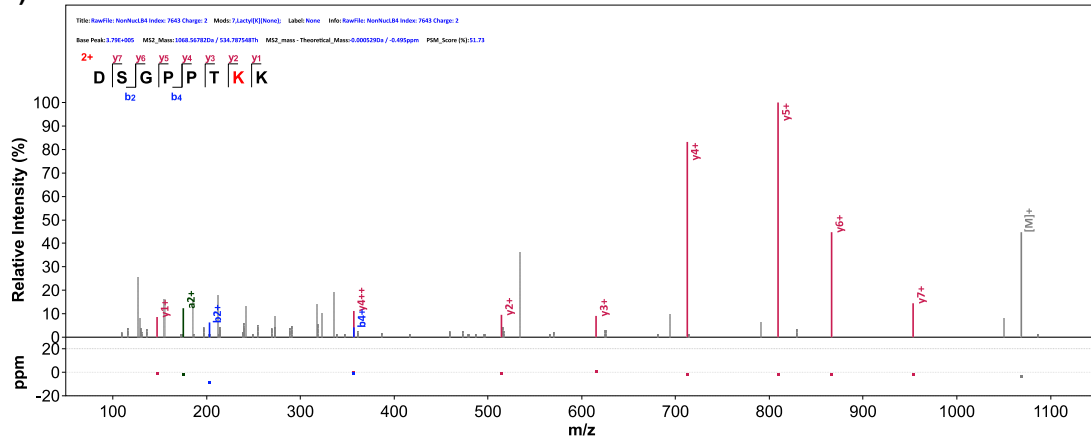**(B)**

| Ion Type | Experimental m/z | Ion Type | Experimental m/z |
|----------|------------------|----------|------------------|
| b2+      | 203.0662         | y1+      | 147.1128         |
| b4+      | 357.1405         | y2+      | 514.3347         |
|          |                  | y3+      | 615.3824         |
|          |                  | y4+      | 712.4352         |
|          |                  | y5+      | 809.4879         |
|          |                  | y6+      | 866.5094         |
|          |                  | y7+      | 953.5414         |
|          |                  | y4++     | 356.7212         |

**Figure S14.** MS/MS analysis of a representative YnLac-modified peptide from NUCKS1. (A) The MS/MS peptide spectrum showing the identification of YnLac modification on the K35 residue (in red) of NUCKS1. (B) Summary of the assigned MS/MS fragment ion peaks of the YnLac-modified NUCKS1 peptide shown in (A).

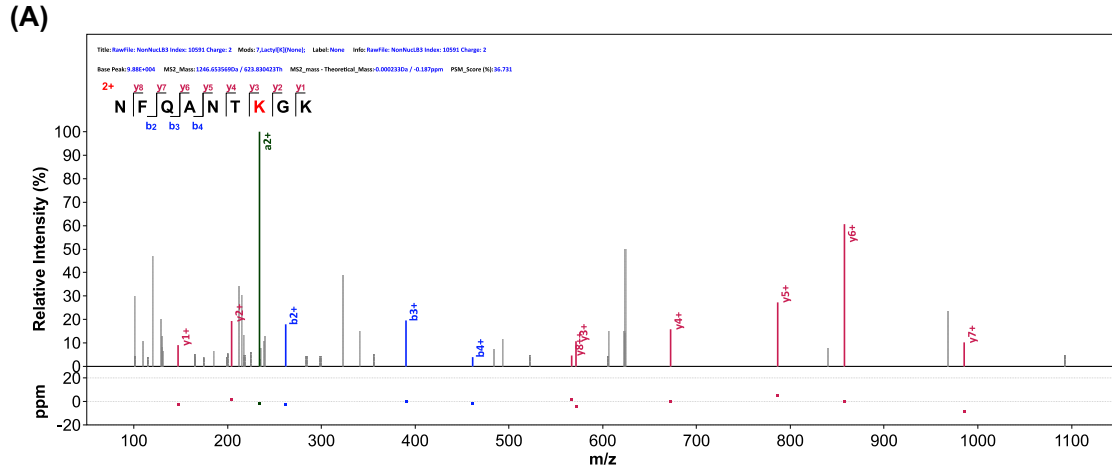

**(B)**

| Ion Type | Experimental m/z | Ion Type | Experimental m/z |
|----------|------------------|----------|------------------|
| b2+      | 262.1186         | y1+      | 147.1128         |
| b3+      | 390.1772         | y2+      | 204.1343         |
| b4+      | 461.2143         | y3+      | 571.3562         |
|          |                  | y4+      | 672.4039         |
|          |                  | y5+      | 786.4468         |
|          |                  | y6+      | 857.4839         |
|          |                  | y7+      | 985.5425         |
|          |                  | y8++     | 566.8091         |

**Figure S15.** MS/MS analysis of a representative YnLac-modified peptide from DNAJC8. (A) The MS/MS peptide spectrum showing the identification of YnLac modification on the K231 residue (in red) of DNAJC8. (B) Summary of the assigned MS/MS fragment ion peaks of the YnLac-modified DNAJC8 peptide shown in (A).

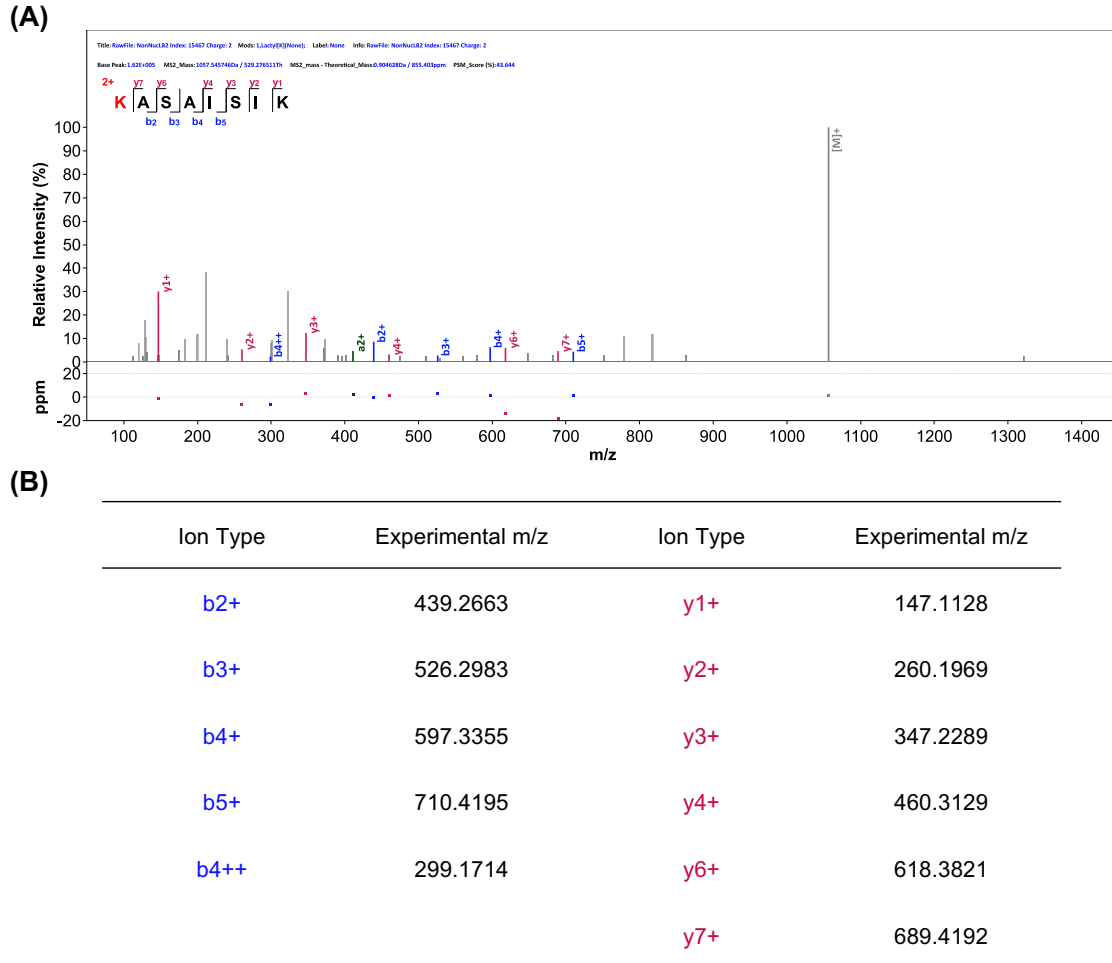

**Figure S16.** MS/MS analysis of a representative YnLac-modified peptide from PCNP. (A) The MS/MS peptide spectrum showing the identification of YnLac modification on the K82 residue (in red) of PCNP. (B) Summary of the assigned MS/MS fragment ion peaks of the YnLac-modified PCNP peptide shown in (A).

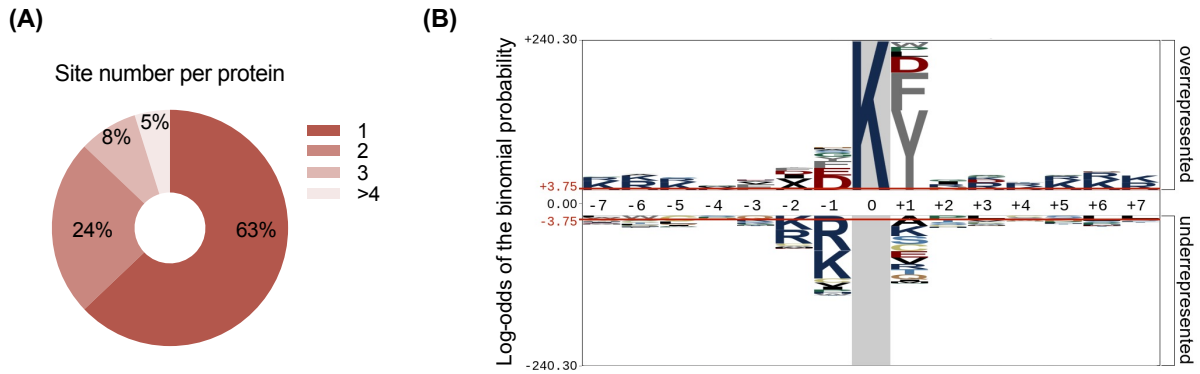

**Figure S17.** Analysis of lactylation sites. (A) Distribution of identified lactylation sites on proteins. (B) Sequence motif analysis of acetylated peptides. The red horizontal lines denote thresholds of  $p < 0.05$ . Acetylation sites were identified in a previous report.<sup>[13]</sup>

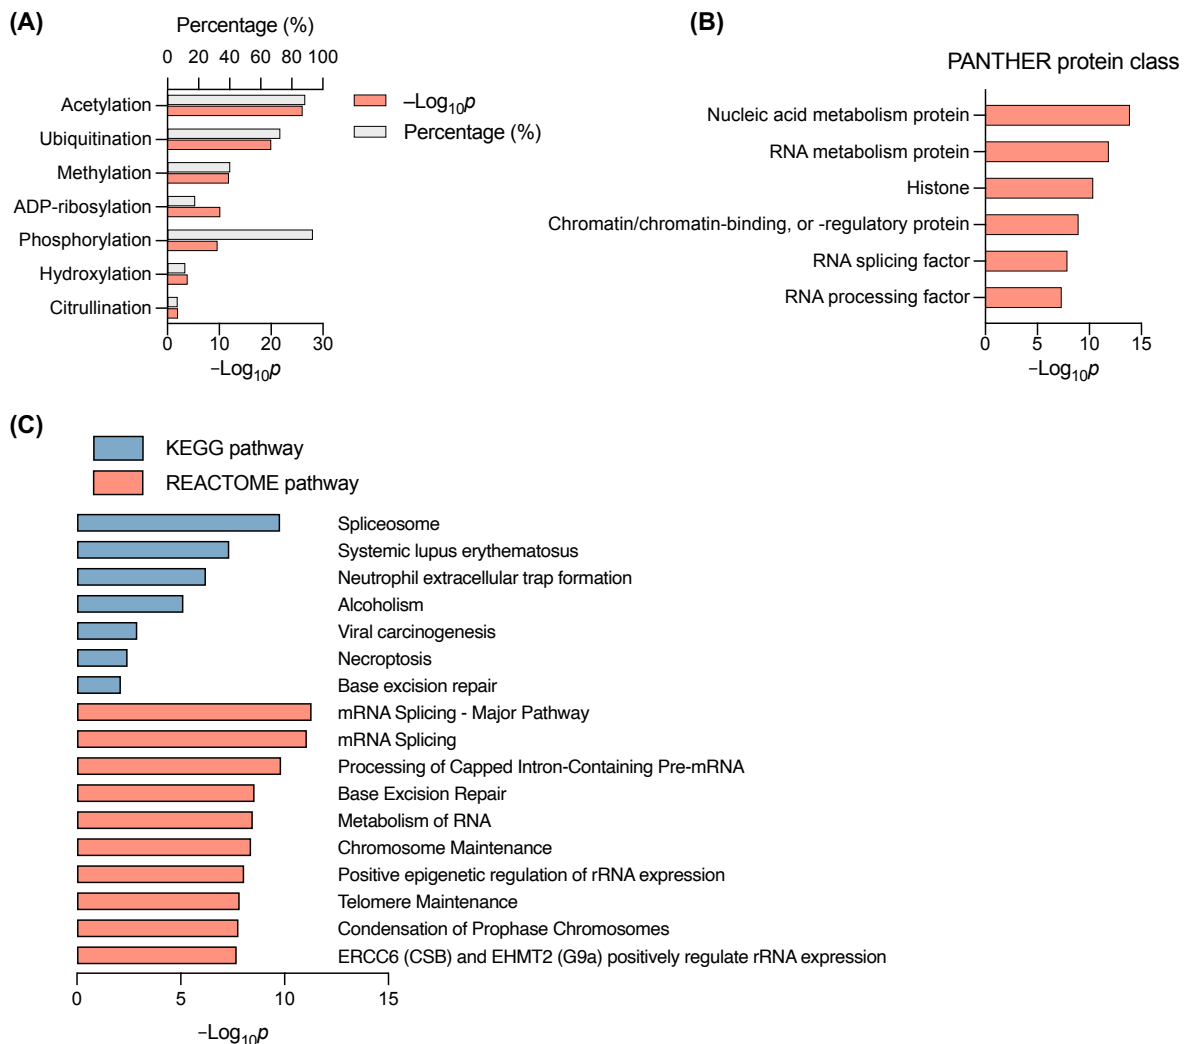

**Figure S18.** Bioinformatic analysis of lactylated proteins. (A) Post-translational modification (PTM) enrichment analysis of lactylated proteins. (B) PANTHER protein class enrichment analysis of lactylated proteins. (C) KEGG and REACTOME pathway enrichment analysis of lactylated proteins.

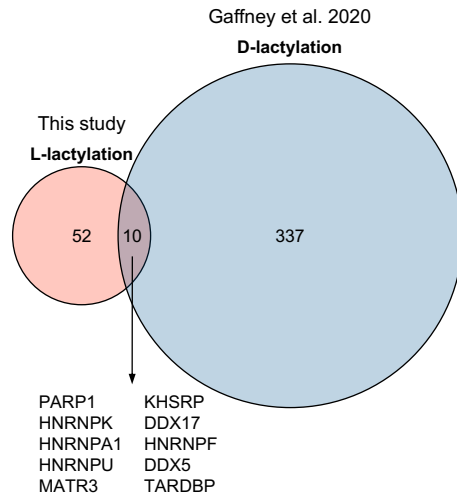

**Figure S19.** Cross-reference of L-lactylated and D-lactylated proteins. D-lactylated proteins were reported in a previous study.<sup>[14]</sup>

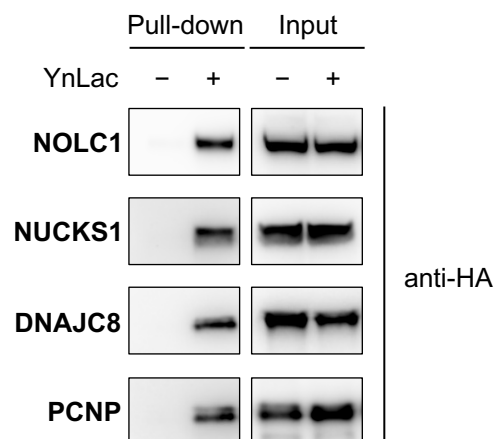

**Figure S20.** Validation of the enrichment of newly identified lactylated proteins. HEK293T cells expressing HA-tagged candidate lactylated proteins were labeled with YnLac (20 mM) for 8 h and lysed for click reactions with az-biotin. After pull-down with streptavidin beads, the enriched proteins were eluted for Western blotting analysis.



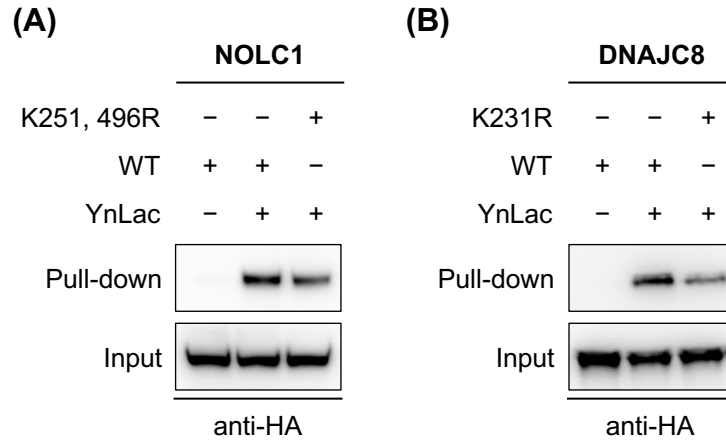

**Figure S21.** Validation of the identification of YnLac-modified sites on NOLC1 and DNAJC8. HEK293T cells expressing HA-tagged candidate lactylated proteins or KR mutants were labeled with YnLac (20 mM) for 8 h and lysed for click reactions with az-biotin. After pull-down with streptavidin beads, the enriched proteins were eluted for Western blotting analysis. (A) NOLC1 wild-type protein and its K251/496R mutant. (B) DNAJC8 wild-type protein and its K231R mutant.

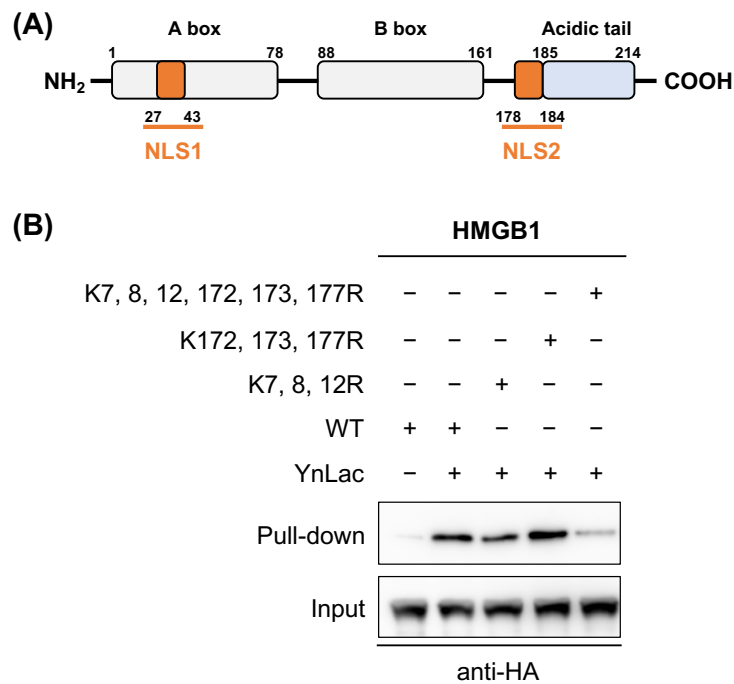

**Figure S22.** Investigation on YnLac-modified sites on HMGB1. (A) HMGB1 protein domains. NLS1: the first nuclear localization signal (residues 27–43); NLS2: the second nuclear localization signal (residues 178–184). (B) Pull-down of YnLac-labelled HMGB1 and mutants. HEK293T cells expressing HA-tagged HMGB1 or KR mutants (K7/8/12R, K172/173/177R, and K7/8/12/172/173/177R) were labeled with YnLac (20 mM) for 8 h and lysed for click reactions with az-biotin. After pull-down with streptavidin beads, the enriched proteins were eluted for Western blotting analysis.

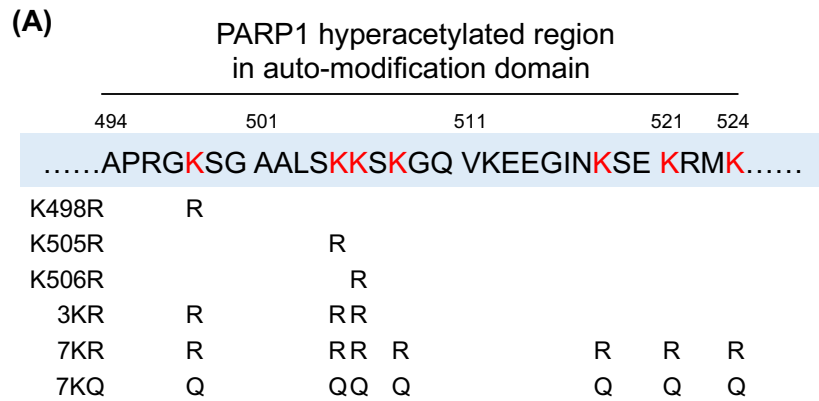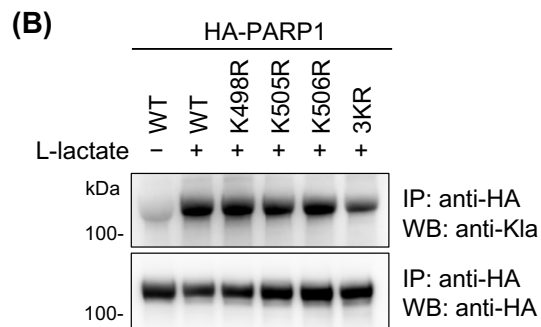

**Figure S23.** Analysis of PARP1 lactylation. (A) Schematic of the PARP1 disordered segment in auto-modification domain and its mutants. 7KQ is a hyperacetylated mimic.<sup>[15]</sup> (B) Western blotting analysis of lactylation of PARP1 and mutants. HEK293T cells expressing HA-tagged PARP1 or mutants were treated with or without sodium L-lactate (25 mM) and lysed for immunoprecipitation. The immunoprecipitates were analyzed by Western blotting using a pan anti-lactyllysine antibody (anti-KIa). Anti-HA blotting shows the protein loading for each lane.

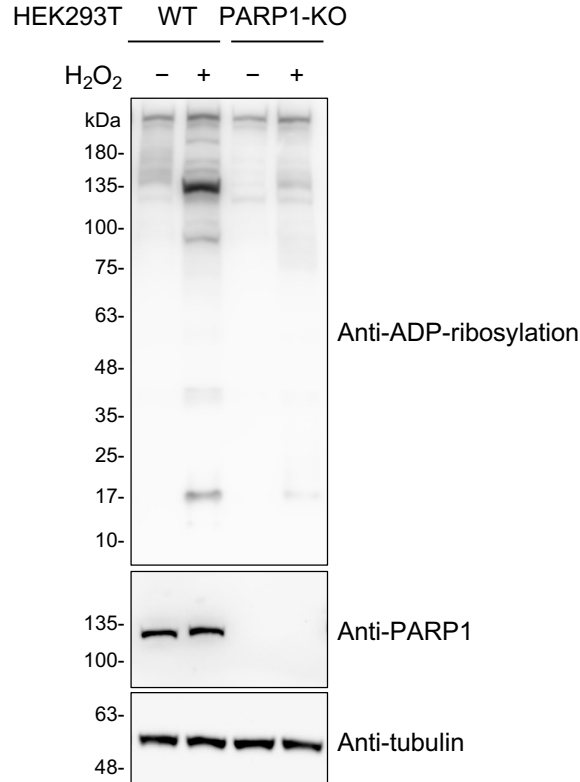

**Figure S24.** Characterization of PARP1 knockout HEK293T cells. Wild-type (WT) and PARP1 knockout cells were treated with or without 2 mM H<sub>2</sub>O<sub>2</sub> for 10 min and lysed for Western blot analysis.

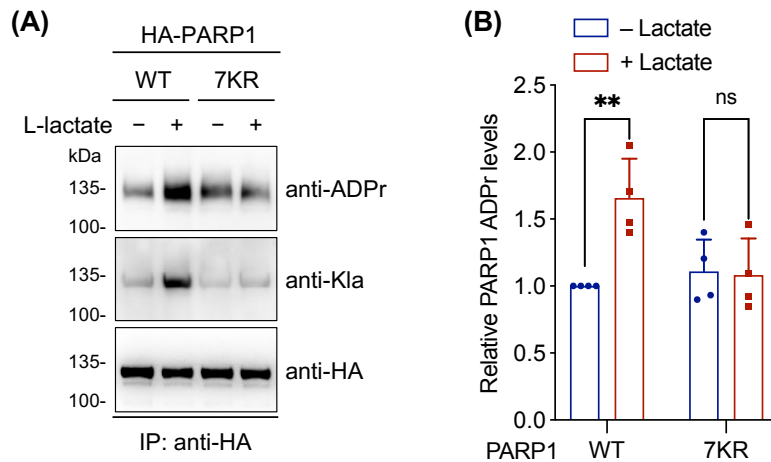

**Figure S25.** Investigation on PARP1 auto-ADP-ribosylation. (A) Analysis of auto-ADP-ribosylation of PARP1 and mutants. PARP1 knockout HEK293T cells were transfected with HA-tagged PARP1 or 7KR mutant (K498/505/506/508/518/521/524R), treated with or without sodium L-lactate (10 mM), and stimulated with 2 mM H<sub>2</sub>O<sub>2</sub> for 10 min. Cells were lysed for immunoprecipitation and Western blot analysis using an anti-ADP-ribosylation antibody (anti-ADPr). (B) Quantification of auto-ADP-ribosylation levels of PARP1 relative to anti-HA signals shown in (A). Data are represented as mean  $\pm$  s.d.,  $n = 4$ . \*\* indicates a  $p$ -value  $< 0.01$ , and ns indicates a  $p$ -value  $> 0.05$ , calculated by Two-way ANOVA test.

## Supplementary Tables

**Table S1.** Summary of the lactylation sites identified in the nuclear fraction. The complete list is shown in Table S2 in the associated excel file.  
<sup>a</sup> For the “Position within protein”, the *N*-terminal Met residue of each protein is counted as Met1.

| Protein | Protein name                            | Gene name | Position within protein <sup>a</sup> | Modified Sequence and Lactyl (K) Probabilities | PEP       | Score  | Delta score | Score for localization | Reported? [16] |
|---------|-----------------------------------------|-----------|--------------------------------------|------------------------------------------------|-----------|--------|-------------|------------------------|----------------|
| Q16778  | Histone H2B type 2-E                    | HIST2H2BE | 21                                   | KAVTK(1)AQK                                    | 0         | 168.26 | 71.191      | 168.26                 | Y              |
| Q16778  | Histone H2B type 2-E                    | HIST2H2BE | 6                                    | PEPAK(1)SAPAPK                                 | 0         | 136.7  | 117.04      | 136.7                  | Y              |
| Q16778  | Histone H2B type 2-E                    | HIST2H2BE | 12                                   | SAPAPK(0.998)K(0.002)GSK                       | 6.78E-141 | 84.244 | 51.773      | 82.417                 | Y              |
| Q99878  | Histone H2A type 1-J                    | HIST1H2AJ | 10                                   | GKQGGK(1)AR                                    | 3.50E-19  | 71.877 | 19.194      | 71.877                 | N              |
| P05114  | Non-histone chromosomal protein HMGN-14 | HMGN1     | 5                                    | K(1)VSSAEGAAKEEPK                              | 1.16E-22  | 69.92  | 50.605      | 69.92                  | N              |
| P06748  | Nucleophosmin                           | NPM1      | 202                                  | DTPAK(1)NAQK                                   | 8.18E-06  | 68.224 | 52.582      | 68.224                 | N              |
| Q71UI9  | Histone H2A.V                           | H2AFV     | 5                                    | AGGK(1)AGK                                     | 2.12E-37  | 88.029 | 55.136      | 88.029                 | N              |
| Q93079  | Histone H2B type 1-H                    | HIST1H2BH | 6                                    | PDPAK(1)SAPAPK                                 | 0         | 125.54 | 108.31      | 125.54                 | Y              |
| Q93079  | Histone H2B type 1-H                    | HIST1H2BH | 12                                   | SAPAPK(0.998)K(0.002)GSK                       | 6.78E-141 | 84.244 | 51.773      | 82.417                 | Y              |
| P58876  | Histone H2B type 1-D                    | HIST1H2BD | 6                                    | PEPTK(1)SAPAPK                                 | 0         | 95.094 | 81.285      | 91.961                 | Y              |
| P58876  | Histone H2B type 1-D                    | HIST1H2BD | 12                                   | SAPAPK(0.998)K(0.002)GSK                       | 6.78E-141 | 84.244 | 51.773      | 82.417                 | Y              |
| P62805  | Histone H4                              | HIST1H4A  | 9                                    | GGK(1)GLGK                                     | 0         | 94.262 | 27.269      | 80.462                 | Y              |
| P62805  | Histone H4                              | HIST1H4A  | 13                                   | GLGK(1)GGAK                                    | 0         | 98.458 | 45.521      | 98.458                 | Y              |
| P84243  | Histone H3.3                            | H3F3A     | 24                                   | KQLATK(1)AAR                                   | 3.16E-08  | 81.525 | 33.565      | 81.525                 | Y              |

|        |                                 |           |     |                          |            |        |        |        |   |
|--------|---------------------------------|-----------|-----|--------------------------|------------|--------|--------|--------|---|
| P84243 | Histone H3.3                    | H3F3A     | 28  | K(1)SAPSTGGVK            | 0.00191255 | 56.548 | 30.105 | 56.548 | Y |
| Q53EL6 | Programmed cell death protein 4 | PDCD4     | 115 | K(1)GGAGGK               | 8.61E-206  | 86.086 | 18.346 | 86.086 | N |
| Q92576 | PHD finger protein 3            | PHF3      | 957 | AAK(1)VATK               | 9.37E-263  | 88.029 | 18.715 | 88.029 | N |
| Q99880 | Histone H2B type 1-L            | HIST1H2BL | 6   | PELAK(1)SAPAPK           | 0.00136829 | 60.255 | 49.884 | 60.255 | Y |
| Q99880 | Histone H2B type 1-L            | HIST1H2BL | 12  | SAPAPK(0.998)K(0.002)GSK | 6.78E-141  | 84.244 | 51.773 | 82.417 | Y |

**Table S2.** Complete list of the lactylation sites identified in the nuclear fraction. All database search information is listed. See the associated excel file.

**Table S3.** Summary of the lactylation sites identified in the cytoplasmic fraction. The complete list is shown in Table S4 in the associated excel file.

<sup>a</sup> For the “Position within protein”, the *N*-terminal Met residue of each protein is counted as Met1.

| Protein    | Protein name                                      | Gene name   | Position within protein <sup>a</sup> | Modified Sequence and Lactyl (K) Probabilities | PEP        | Score  | Delta score | Score for localization |
|------------|---------------------------------------------------|-------------|--------------------------------------|------------------------------------------------|------------|--------|-------------|------------------------|
| A0A024R1R8 | Translation machinery-associated protein 7        | hCG_2014768 | 59                                   | GPLATGGIK(0.5)K(0.5)                           | 0.00042973 | 53.756 | 28.197      | 53.756                 |
| A0A024R1R8 | Translation machinery-associated protein 7        | hCG_2014768 | 60                                   | GPLATGGIK(0.5)K(0.5)                           | 0.00042973 | 53.756 | 28.197      | 53.756                 |
| O00193     | Small acidic protein                              | SMAP        | 174                                  | SNYK(1)MMFVK                                   | 0.00583565 | 56.916 | 46.911      | 56.916                 |
| O15042     | U2 snRNP-associated SURP motif-containing protein | U2SURP      | 88                                   | AFSIGK(0.952)MSTAK(0.048)                      | 5.58E-12   | 55.314 | 36.22       | 55.314                 |
| O43719     | HIV Tat-specific factor 1                         | HTATSF1     | 239                                  | K(1)LSMQQK                                     | 0.0156274  | 41.892 | 18.124      | 41.892                 |
| O43768     | Alpha-endosulfine                                 | ENSA        | 107                                  | K(1)SSLVTSK                                    | 0.0214605  | 44.753 | 11.861      | 44.753                 |
| O43768     | Alpha-endosulfine                                 | ENSA        | 80                                   | NK(1)QLPSAGPDK                                 | 0.0035582  | 49.934 | 36.897      | 49.934                 |
| O60869     | Endothelial differentiation-related factor 1      | EDF1        | 23                                   | KKGPTAAQAK(0.731)SK(0.269)                     | 1.58E-06   | 48.532 | 31.619      | 48.532                 |
| O60869     | Endothelial differentiation-related factor 1      | EDF1        | 25                                   | SK(1)QAILAAQR                                  | 3.41E-14   | 74.841 | 38.446      | 74.841                 |
| O75937     | DnaJ homolog subfamily C member 8                 | DNAJC8      | 231                                  | NFQANTK(0.898)GK(0.102)                        | 6.83E-28   | 80.688 | 55.794      | 74.173                 |
| P05455     | Lupus La protein                                  | SSB         | 354                                  | GK(1)VQFQGK                                    | 2.78E-155  | 98.458 | 74.503      | 98.458                 |
| P06748     | Nucleophosmin                                     | NPM1        | 202                                  | DTPAK(1)NAQK                                   | 1.53E-12   | 74.301 | 36.743      | 67.494                 |
| P06748     | Nucleophosmin                                     | NPM1        | 233                                  | KQEK(1)TPK                                     | 0          | 116.25 | 67.19       | 109.71                 |
| P06748     | Nucleophosmin                                     | NPM1        | 141                                  | LLSISGK(1)R                                    | 0.00798037 | 60.91  | 11.552      | 41.448                 |
| P06748     | Nucleophosmin                                     | NPM1        | 150                                  | SAPGGGSK(0.999)VPQK(0.001)                     | 3.23E-05   | 51.286 | 36.275      | 51.286                 |

|        |                                                |         |     |                        |            |        |        |        |
|--------|------------------------------------------------|---------|-----|------------------------|------------|--------|--------|--------|
| P06748 | Nucleophosmin                                  | NPM1    | 223 | SK(1)GQESFK            | 5.66E-88   | 91.867 | 35.745 | 91.867 |
| P06748 | Nucleophosmin                                  | NPM1    | 239 | TPK(1)GPSSVEDIK        | 1.66E-05   | 61.235 | 37.28  | 61.235 |
| P07910 | Heterogeneous nuclear ribonucleoproteins C1/C2 | HNRNPC  | 157 | AVVPSK(1)R             | 7.11E-79   | 86.866 | 29.764 | 86.866 |
| P07910 | Heterogeneous nuclear ribonucleoproteins C1/C2 | HNRNPC  | 94  | GK(1)AGVKR             | 0.0196069  | 64.757 | 26.624 | 64.757 |
| P07910 | Heterogeneous nuclear ribonucleoproteins C1/C2 | HNRNPC  | 176 | SGFNSK(1)SGQR          | 1.23E-133  | 93.839 | 83.12  | 93.839 |
| P09429 | High mobility group protein B1                 | HMGB1   | 177 | KGVVK(1)AEK            | 0          | 120.31 | 68.519 | 120.31 |
| P09651 | Heterogeneous nuclear ribonucleoprotein A1     | HNRNPA1 | 3   | SK(1)SESPKEPEQLR       | 7.82E-06   | 63.185 | 50.177 | 63.185 |
| P09661 | U2 small nuclear ribonucleoprotein A'          | SNRPA1  | 172 | GAQLAK(1)DIAR          | 0.0107642  | 57.785 | 42.525 | 57.785 |
| P09874 | Poly [ADP-ribose] polymerase 1                 | PARP1   | 498 | GK(1)SGAALSK           | 2.66E-48   | 82.008 | 50.073 | 82.008 |
| P09874 | Poly [ADP-ribose] polymerase 1                 | PARP1   | 505 | SGAALSK(0.692)K(0.308) | 0.0046151  | 64.42  | 37.283 | 64.42  |
| P09874 | Poly [ADP-ribose] polymerase 1                 | PARP1   | 506 | SGAALSK(0.429)K(0.571) | 0.00504922 | 57.59  | 32.752 | 50.04  |
| P17844 | Probable ATP-dependent RNA helicase DDX5       | DDX5    | 523 | GYSSLLK(1)R            | 0.00761281 | 61.962 | 32.813 | 52.716 |
| P17844 | Probable ATP-dependent RNA helicase DDX5       | DDX5    | 33  | K(1)FGNPGEK            | 0.00088372 | 62.546 | 30.076 | 62.546 |
| P19338 | Nucleolin                                      | NCL     | 95  | AAATPAK(0.5)K(0.5)     | 0.00565823 | 63.565 | 33.822 | 63.565 |
| P19338 | Nucleolin                                      | NCL     | 96  | K(1)TVTPAK             | 0.00248219 | 67.981 | 34.43  | 67.981 |
| P19338 | Nucleolin                                      | NCL     | 223 | AAK(1)VVPVK            | 1.10E-204  | 103.83 | 52.867 | 103.83 |
| P19338 | Nucleolin                                      | NCL     | 87  | AAVTPGK(0.819)K(0.181) | 0.0207502  | 46.813 | 25.131 | 46.813 |
| P19338 | Nucleolin                                      | NCL     | 88  | K(1)AAATPAKK           | 9.53E-27   | 78.113 | 48.775 | 78.113 |
| P19338 | Nucleolin                                      | NCL     | 9   | AGK(1)NQGDPK           | 3.28E-05   | 68.371 | 42.325 | 68.371 |

|        |                                                             |        |     |                                  |            |        |        |        |
|--------|-------------------------------------------------------------|--------|-----|----------------------------------|------------|--------|--------|--------|
| P19338 | Nucleolin                                                   | NCL    | 124 | ALVATPGK(0.5)K(0.5)              | 1.02E-75   | 89.698 | 66.679 | 89.698 |
| P19338 | Nucleolin                                                   | NCL    | 125 | K(1)GAAIPAK                      | 2.77E-228  | 109.11 | 79.961 | 64.265 |
| P19338 | Nucleolin                                                   | NCL    | 110 | K(1)GATPGK                       | 1.69E-12   | 73.26  | 25.411 | 73.26  |
| P19338 | Nucleolin                                                   | NCL    | 116 | GATPGK(1)ALVATPGK                | 9.89E-12   | 56.872 | 43.809 | 52.527 |
| P19338 | Nucleolin                                                   | NCL    | 55  | K(1)AAATSAK                      | 0          | 122.28 | 72.691 | 122.28 |
| P19338 | Nucleolin                                                   | NCL    | 63  | K(1)VVVSPK                       | 2.73E-77   | 86.136 | 30.766 | 86.136 |
| P19338 | Nucleolin                                                   | NCL    | 80  | K(1)AAVTPGKK                     | 1.64E-228  | 109.71 | 54.184 | 70.056 |
| P19338 | Nucleolin                                                   | NCL    | 102 | TVTPAK(1)AVTTPGK                 | 1.55E-87   | 90.412 | 62.129 | 90.412 |
| P19338 | Nucleolin                                                   | NCL    | 71  | K(1)VAVATPAK                     | 4.33E-06   | 68.557 | 52.018 | 68.557 |
| P19338 | Nucleolin                                                   | NCL    | 79  | VAVATPAK(0.909)K(0.091)          | 0          | 123.72 | 55.74  | 123.72 |
| P27694 | Replication protein A 70 kDa DNA-binding subunit            | RPA1   | 163 | AYGASK(0.995)TFGK(0.005)         | 1.72E-18   | 73.499 | 55.275 | 73.499 |
| P27694 | Replication protein A 70 kDa DNA-binding subunit            | RPA1   | 88  | FIVNTLK(1)DGR                    | 0.00233473 | 56.404 | 46.4   | 47.302 |
| P37108 | Signal recognition particle 14 kDa protein                  | SRP14  | 43  | K(1)GTVEGFEPADNK                 | 1.90E-05   | 44.511 | 34.711 | 44.511 |
| P39748 | Flap endonuclease 1                                         | FEN1   | 361 | RKEPEPK(0.998)GSTK(0.002)        | 0.00028173 | 50.354 | 26.677 | 50.354 |
| P43243 | Matrin-3                                                    | MATR3  | 702 | K(1)DGSASAAAK                    | 1.16E-15   | 57.532 | 28.383 | 57.532 |
| P51965 | Ubiquitin-conjugating enzyme E2 E1                          | UBE2E1 | 43  | NSK(1)LLSTSAK                    | 0.00044788 | 64.82  | 45.034 | 64.82  |
| P52597 | Heterogeneous nuclear ribonucleoprotein F                   | HNRNPF | 224 | YIGIVK(1)QAGLER                  | 6.92E-22   | 73.435 | 48.582 | 71.176 |
| P53999 | Activated RNA polymerase II transcriptional coactivator p15 | SUB1   | 53  | ALSSSK(1)QSSSSR                  | 2.47E-38   | 80.69  | 53.209 | 80.69  |
| P53999 | Activated RNA polymerase II transcriptional coactivator p15 | SUB1   | 29  | K(0.998)QVAPEK(0.001)PVK(0.001)K | 0.00245052 | 40.154 | 21.197 | 40.154 |



|        |                                                                             |          |     |                                              |            |        |        |        |
|--------|-----------------------------------------------------------------------------|----------|-----|----------------------------------------------|------------|--------|--------|--------|
| P61978 | Heterogeneous nuclear ribonucleoprotein K                                   | HNRNPK   | 405 | DLAGSIIGK(1)GGQR                             | 5.74E-06   | 55.261 | 41.861 | 49.448 |
| P62304 | Small nuclear ribonucleoprotein E                                           | SNRPE    | 12  | VQK(1)VMVQPINLIFR                            | 1.04E-05   | 59.227 | 51.66  | 59.227 |
| Q5VTE0 | Putative elongation factor 1-alpha-like 3                                   | EEF1A1P5 | 457 | SAQK(1)AQK                                   | 1.77E-169  | 104.37 | 45.016 | 104.21 |
| Q5VTE0 | Putative elongation factor 1-alpha-like 3                                   | EEF1A1P5 | 453 | VTK(1)SAQK                                   | 3.92E-15   | 77.282 | 39.637 | 72.789 |
| P78347 | General transcription factor II-I                                           | GTF2I    | 353 | EFNFEK(1)WNAR                                | 0.0118696  | 51.762 | 42.44  | 51.762 |
| Q00839 | Heterogeneous nuclear ribonucleoprotein U                                   | HNRNPU   | 215 | K(1)AEGGGGGGRPGAPAAGDGK                      | 9.49E-20   | 54.964 | 44.194 | 54.964 |
| Q01105 | Protein SET                                                                 | SET      | 189 | SSQTQNK(1)ASR                                | 5.13E-131  | 97.813 | 83.134 | 87.568 |
| Q07666 | KH domain-containing, RNA-binding, signal transduction-associated protein 1 | KHDRBS1  | 432 | APPARPVK(1)GAYR                              | 9.54E-05   | 47.302 | 25.752 | 47.302 |
| Q08945 | FACT complex subunit SSRP1                                                  | SSRP1    | 540 | K(0.5)GK(0.5)DPNAPK                          | 0.0130152  | 45.022 | 29.878 | 45.022 |
| Q08945 | FACT complex subunit SSRP1                                                  | SSRP1    | 542 | K(0.5)GK(0.5)DPNAPK                          | 0.0130152  | 45.022 | 29.878 | 45.022 |
| Q13148 | TAR DNA-binding protein 43                                                  | TARDBP   | 84  | K(1)MDETDASSAVK                              | 0.00049464 | 60.196 | 48.613 | 60.196 |
| Q13185 | Chromobox protein homolog 3                                                 | CBX3     | 92  | K(1)SLSDSESDSK                               | 7.68E-23   | 73.927 | 63.283 | 73.927 |
| Q13185 | Chromobox protein homolog 3                                                 | CBX3     | 20  | SK(0.955)K(0.045)VEEAEPEEFVVEK               | 6.83E-11   | 58.246 | 46.663 | 58.246 |
| Q13185 | Chromobox protein homolog 3                                                 | CBX3     | 10  | TTLQK(0.996)MGK(0.004)                       | 3.99E-33   | 82.671 | 53.522 | 82.671 |
| Q13435 | Splicing factor 3B subunit 2                                                | SF3B2    | 877 | K(1)AQPQDSR                                  | 0.0164184  | 48.794 | 31.282 | 48.794 |
| Q14978 | Nucleolar and coiled-body phosphoprotein 1                                  | NOLC1    | 496 | K(0.199)K(0.199)PQK(0.602)VAGGAA<br>PSKPASAK | 2.08E-15   | 47.088 | 29.972 | 43.696 |
| Q14978 | Nucleolar and coiled-body phosphoprotein 1                                  | NOLC1    | 251 | K(0.003)QVVAK(0.997)APVK                     | 0.00182515 | 49.06  | 16.59  | 49.06  |
| Q15233 | Non-POU domain-containing octamer-binding protein                           | NONO     | 467 | AAPGAEFAPNK(1)R                              | 0          | 119.39 | 105.21 | 119.39 |
| Q15691 | Microtubule-associated protein RP/EB family member 1                        | MAPRE1   | 174 | TAAAPK(1)AGPGVVR                             | 9.78E-06   | 47.062 | 35.015 | 41.242 |

|        |                                                                   |          |     |                           |            |        |        |        |
|--------|-------------------------------------------------------------------|----------|-----|---------------------------|------------|--------|--------|--------|
| Q4G0X9 | Coiled-coil domain-containing protein 40                          | CCDC40   | 881 | ETIK(0.89)MQDK(0.11)      | 0.018897   | 54.157 | 25.008 | 54.157 |
| Q8WW12 | PEST proteolytic signal-containing nuclear protein                | PCNP     | 82  | K(1)ASAIK                 | 3.96E-19   | 74.173 | 33.291 | 72.607 |
| Q8WXF1 | Paraspeckle component 1                                           | PSPC1    | 14  | IEK(1)NPAR                | 1.24E-41   | 68.312 | 40.138 | 40.268 |
| Q92841 | Probable ATP-dependent RNA helicase DDX17                         | DDX17    | 109 | K(1)FGNPGER               | 0.00761281 | 61.962 | 48.954 | 61.962 |
| Q92945 | Far upstream element-binding protein 2                            | KHSRP    | 71  | K(1)DAFADAVQR             | 0.00393654 | 44.543 | 30.385 | 44.543 |
| Q96AT1 | Uncharacterized protein KIAA1143                                  | KIAA1143 | 99  | K(0.814)PVK(0.186)HPSDEK  | 0.00146283 | 51.276 | 27.923 | 51.276 |
| Q96I25 | Splicing factor 45                                                | RBM17    | 41  | AALTQAK(1)SQR             | 0.0208151  | 42.21  | 31.98  | 40.496 |
| Q96I25 | Splicing factor 45                                                | RBM17    | 245 | IMQK(1)YGFR               | 6.95E-06   | 55.676 | 35.156 | 45.081 |
| Q96I25 | Splicing factor 45                                                | RBM17    | 24  | NFK(1)LLQSQLQVK           | 0.00156423 | 42.843 | 25.631 | 42.843 |
| Q9H1E3 | Nuclear ubiquitous casein and cyclin-dependent kinase substrate 1 | NUCKS1   | 186 | ATVTPSPVK(0.441)GK(0.559) | 0.00056024 | 54.259 | 34.473 | 54.259 |
| Q9H1E3 | Nuclear ubiquitous casein and cyclin-dependent kinase substrate 1 | NUCKS1   | 35  | DSGPPTK(0.507)K(0.493)    | 0.00058113 | 68.016 | 51.476 | 68.016 |
| Q9H1E3 | Nuclear ubiquitous casein and cyclin-dependent kinase substrate 1 | NUCKS1   | 36  | DSGPPTK(0.424)K(0.576)    | 0.0107158  | 57.59  | 47.511 | 57.59  |
| Q9H1E3 | Nuclear ubiquitous casein and cyclin-dependent kinase substrate 1 | NUCKS1   | 188 | GK(1)VGRPTASK             | 0.00016745 | 55.353 | 31.323 | 55.353 |
| Q9H1E3 | Nuclear ubiquitous casein and cyclin-dependent kinase substrate 1 | NUCKS1   | 196 | VGRPTASK(1)ASK            | 2.95E-37   | 78.705 | 51     | 78.705 |
| Q9H1E3 | Nuclear ubiquitous casein and cyclin-dependent kinase substrate 1 | NUCKS1   | 9   | K(1)VVDYSQFQESDDAEDYGR    | 1.28E-75   | 83.423 | 82.459 | 83.423 |
| Q9H1E3 | Nuclear ubiquitous casein and cyclin-dependent kinase substrate 1 | NUCKS1   | 175 | LK(1)ATVTPSPVK            | 3.81E-12   | 71.176 | 52.081 | 71.176 |
| Q9H1E3 | Nuclear ubiquitous casein and cyclin-dependent kinase substrate 1 | NUCKS1   | 98  | QAASK(1)AASK              | 2.23E-05   | 68.847 | 38.235 | 68.847 |
| Q9H444 | Charged multivesicular body protein 4b                            | CHMP4B   | 6   | SVFGK(1)LFGAGGGK          | 1.09E-07   | 54.343 | 47.656 | 54.343 |
| Q9HB71 | Calcyclin-binding protein                                         | CACYBP   | 212 | TINK(1)AWVESR             | 0.00974291 | 47.302 | 33.493 | 47.302 |

|        |                                               |         |      |                               |            |        |        |        |
|--------|-----------------------------------------------|---------|------|-------------------------------|------------|--------|--------|--------|
| Q9NR30 | Nucleolar RNA helicase 2                      | DDX21   | 97   | K(0.492)K(0.492)K(0.016)EPIEK | 0.0133739  | 45.368 | 22.727 | 45.368 |
| Q9NR30 | Nucleolar RNA helicase 2                      | DDX21   | 98   | K(0.492)K(0.492)K(0.016)EPIEK | 0.0133739  | 45.368 | 22.727 | 45.368 |
| Q9UHX1 | Poly(U)-binding-splicing factor PUF60         | PUF60   | 454  | HMVMQK(1)LLR                  | 0.0134816  | 41.448 | 34.994 | 41.448 |
| Q9Y2W1 | Thyroid hormone receptor-associated protein 3 | THRAP3  | 527  | VTAYK(1)AVQEK                 | 0.00044788 | 64.82  | 41.144 | 64.82  |
| Q9Y5B9 | FACT complex subunit SPT16                    | SUPT16H | 1021 | K(1)ASVHSSGR                  | 0.00197861 | 47.187 | 39.62  | 47.187 |

**Table S4.** Complete list of the lactylation sites identified in the cytoplasmic fraction. All database search information is listed. See the associated excel file.

**Table S5.** PTM enrichment analysis of lactylated proteins. See the associated excel file.

**Table S6.** PANTHER protein class enrichment analysis of lactylated proteins. See the associated excel file.

**Table S7.** GO enrichment analysis of lactylated proteins. See the associated excel file.

**Table S8.** KEGG and REACTOME pathway enrichment analysis of lactylated proteins. See the associated excel file.

## References

- [1] G. Charron, M. M. Zhang, J. S. Yount, J. Wilson, A. S. Raghavan, E. Shamir, H. C. Hang, *J. Am. Chem. Soc.* **2009**, *131*, 4967-4975.
- [2] K. Suzuki, P. Bose, R. Y. Y. Leong-Quong, D. J. Fujita, K. Riabowol, *BMC Res. Notes* **2010**, *3*, 294.
- [3] D. Shechter, H. L. Dormann, C. D. Allis, S. B. Hake, *Nat. Protoc.* **2007**, *2*, 1445-1457.
- [4] J. Cox, M. Mann, *Nat. Biotechnol.* **2008**, *26*, 1367-1372.
- [5] S. Tyanova, T. Temu, P. Sinitcyn, A. Carlson, M. Y. Hein, T. Geiger, M. Mann, J. Cox, *Nat. Methods* **2016**, *13*, 731-740.
- [6] H. Chi, C. Liu, H. Yang, W.-F. Zeng, L. Wu, W.-J. Zhou, R.-M. Wang, X.-N. Niu, Y.-H. Ding, Y. Zhang, Z.-W. Wang, Z.-L. Chen, R.-X. Sun, T. Liu, G.-M. Tan, M.-Q. Dong, P. Xu, P.-H. Zhang, S.-M. He, *Nat. Biotechnol.* **2018**, *36*, 1059-1061.
- [7] D. W. Huang, B. T. Sherman, R. A. Lempicki, *Nat. Protoc.* **2009**, *4*, 44-57.
- [8] H. Mi, D. Ebert, A. Muruganujan, C. Mills, L.-P. Albou, T. Mushayamaha, P. D. Thomas, *Nucleic Acids Res.* **2020**, *49*, D394-D403.
- [9] J. P. O'Shea, M. F. Chou, S. A. Quader, J. K. Ryan, G. M. Church, D. Schwartz, *Nat. Methods* **2013**, *10*, 1211-1212.
- [10] H. Huang, C. N. Arighi, K. E. Ross, J. Ren, G. Li, S.-C. Chen, Q. Wang, J. Cowart, K. Vijay-Shanker, C. H. Wu, *Nucleic Acids Res.* **2018**, *46*, D542-D550.
- [11] P. V. Hornbeck, B. Zhang, B. Murray, J. M. Kornhauser, V. Latham, E. Skrzypek, *Nucleic Acids Res.* **2014**, *43*, D512-D520.
- [12] J. Szychowski, A. Mahdavi, J. J. L. Hodas, J. D. Bagert, J. T. Ngo, P. Landgraf, D. C. Dieterich, E. M. Schuman, D. A. Tirrell, *J. Am. Chem. Soc.* **2010**, *132*, 18351-18360.
- [13] H. Huang, S. Tang, M. Ji, Z. Tang, M. Shimada, X. Liu, S. Qi, J. W. Locasale, R. G. Roeder, Y. Zhao, X. Li, *Mol. Cell* **2018**, *70*, 663-678.e666.
- [14] D. O. Gaffney, E. Q. Jennings, C. C. Anderson, J. O. Marentette, T. Shi, A.-M. Schou Oxvig, M. D. Streeter, M. Johannsen, D. A. Spiegel, E. Chapman, J. R. Roede, J. J. Galligan, *Cell Chem. Biol.* **2020**, *27*, 206-213.e206.
- [15] G. Liszczak, K. L. Diehl, G. P. Dann, T. W. Muir, *Nat. Chem. Biol.* **2018**, *14*, 837-840.
- [16] D. Zhang, Z. Tang, H. Huang, G. Zhou, C. Cui, Y. Weng, W. Liu, S. Kim, S. Lee, M. Perez-Neut, J. Ding, D. Czyz, R. Hu, Z. Ye, M. He, Y. G. Zheng, H. A. Shuman, L. Dai, B. Ren, R. G. Roeder, L. Becker, Y. Zhao, *Nature* **2019**, *574*, 575-580.

# NMR spectra

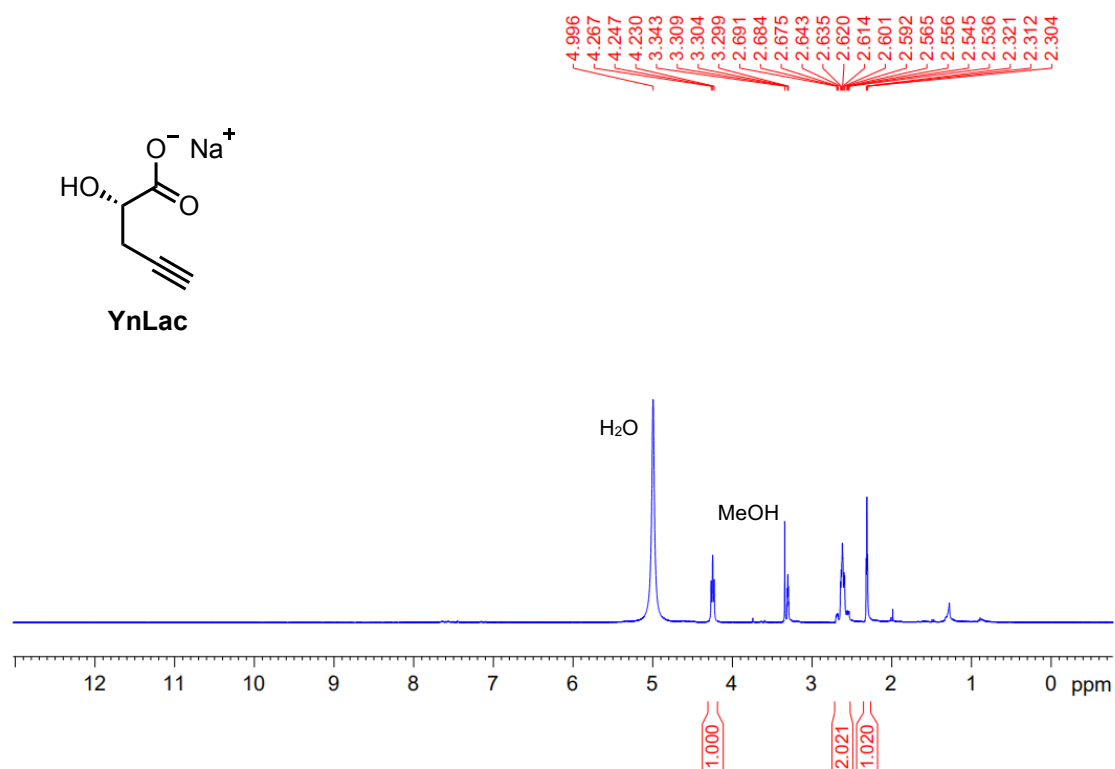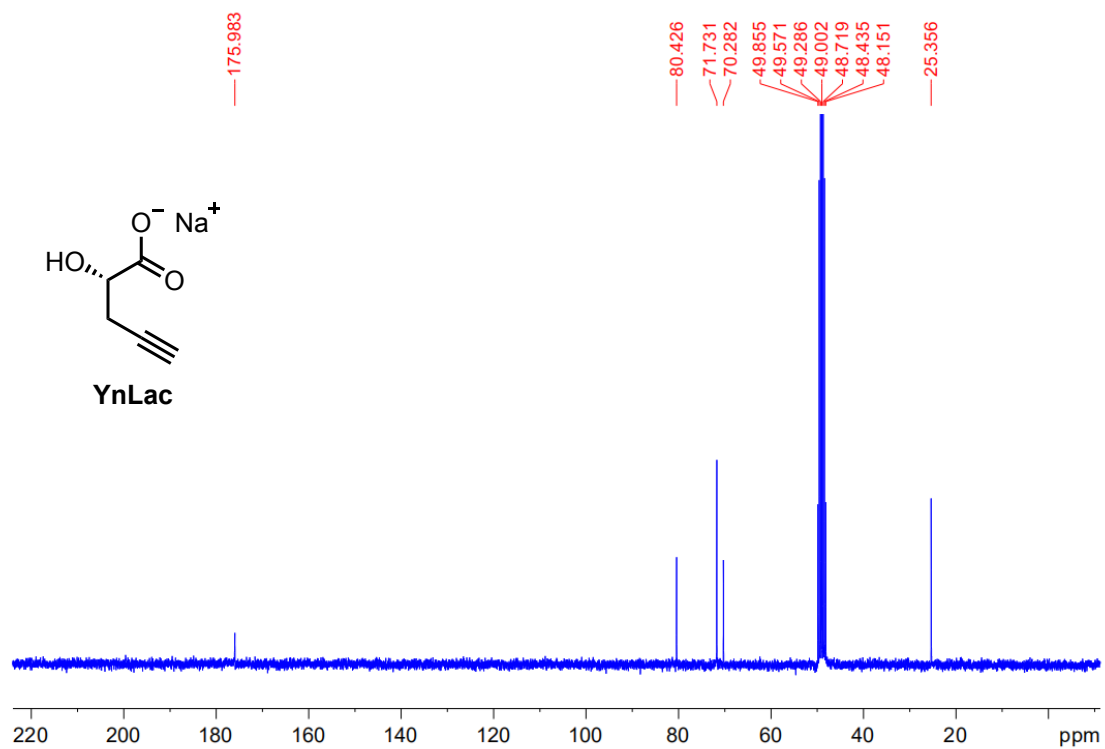

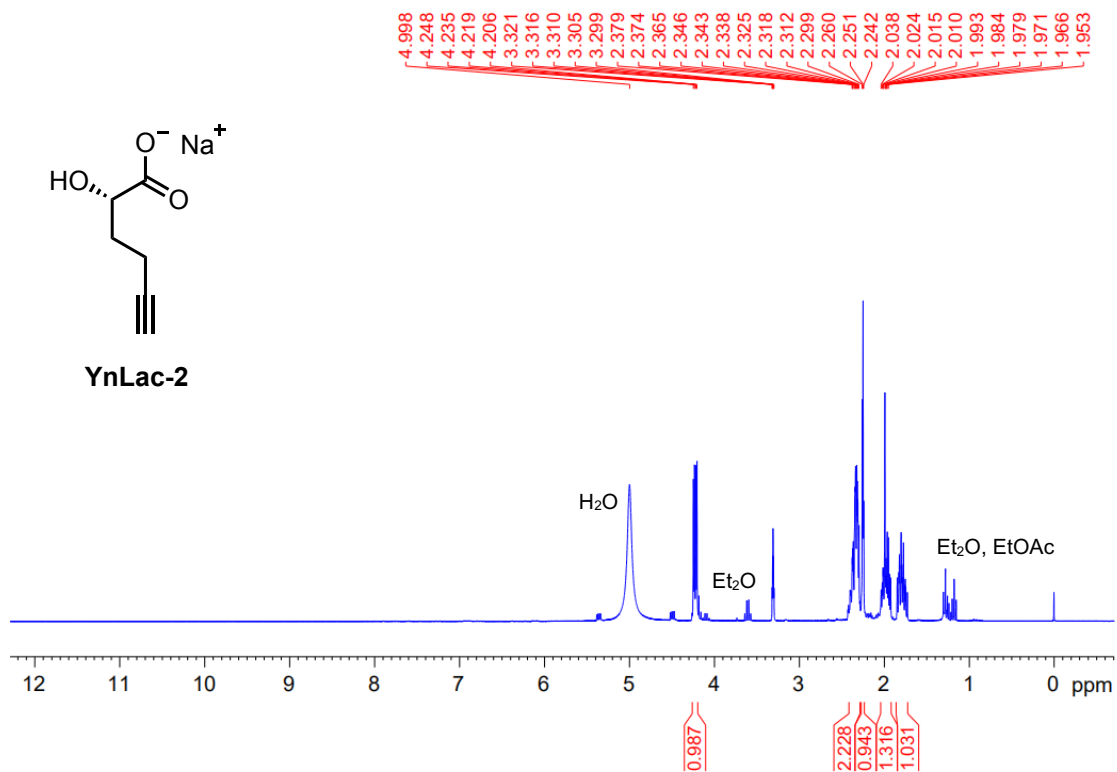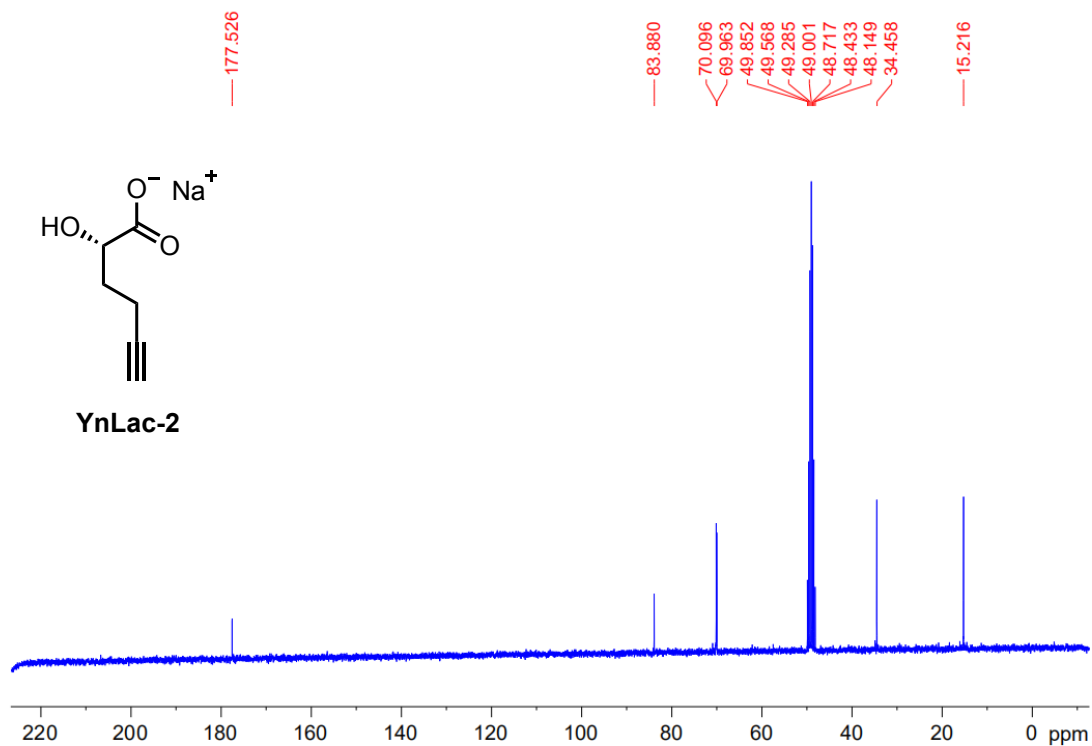

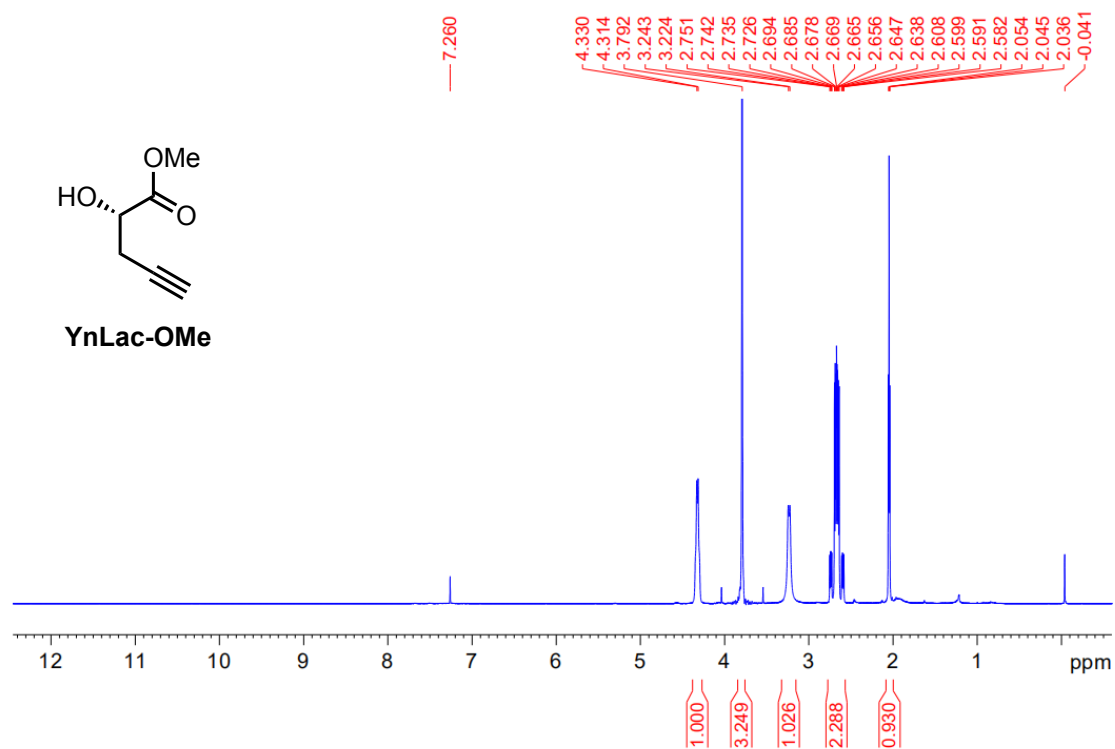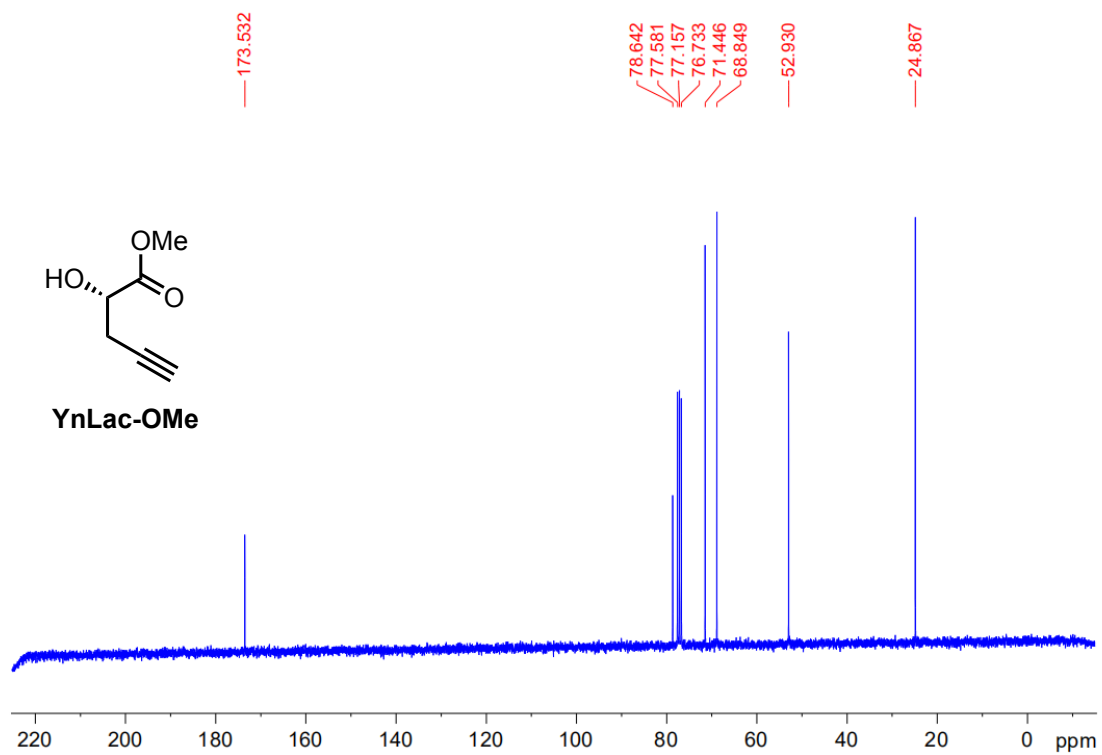

Supplement: SC-013-D2SC00918H-s001.pdf [file SC-013-D2SC00918H-s001.pdf]
