# Supplementary material for: A bioorthogonal chemical reporter for the detection and identification of protein lactylation
Source: Royal Society of Chemistry journal article supplement (doi:10.1039/d2sc00918h), 2022-01-01
Supplement: d2sc00918h2.xlsx [file d2sc00918h2.xlsx]

## Sheet: Table S2
Table S2. Complete list of the lactylation sites identified in the nuclear fraction.
Descriptions of Column Names:
Proteins	Identifiers of proteins this site is associated with
Positions within proteins	For each protein identifier in the 'Proteins' column you find here the psoition of the site in the respective protein sequence
Leading proteins	Top protein identifiers in protein groups
Protein	Identifier of protein this peptide is associated with
Protein names	Names of proteins this peptide is associated with
Gene Names	Names of genes this peptide is associated with
Localization prob	Probability of modification site localization
PEP	The posterior error probability (PEP) of the best identified modified peptide containing this site
Score	The Andromeda score of the best identified modified peptide containing this site
Delta score	The Andromeda delta score of the best identified modified peptide containing this site
Score for localization	The Andromeda score of the MS/MS spectrum used for calculating the localization score for this site
Position in peptide	The position of the modification in the peptide sequence
Charge	Charge state of the precursor ion
m/z	Recalibrated m/z of the precursor ion
Mass error [ppm]	Mass error of the recalibrated mass-over-charge value of the precursor ion in comparison to the predicted monoisotopic mass of the identified peptide sequence
NucLB1, NucLB2, NucLB3, NucLB4	Four replicate samples labeled with YnLac
NucPB1, NucPB2, NucPB3, NucPB4	Four replicate samples treated with L-lactate
Note: Hits in grey background are identified in L-lactate-treated samples and excluded for analysis.
Proteins	Positions within proteins	Leading proteins	Protein	Protein names	Gene names	Fasta headers	Localization prob	Score diff	PEP	Score	Delta score	Score for localization	Localization prob NucLB1	Score diff NucLB1	PEP NucLB1	Score NucLB1	Localization prob NucLB2	Score diff NucLB2	PEP NucLB2	Score NucLB2	Localization prob NucLB3	Score diff NucLB3	PEP NucLB3	Score NucLB3	Localization prob NucLB4	Score diff NucLB4	PEP NucLB4	Score NucLB4	Localization prob NucPB1	Score diff NucPB1	PEP NucPB1	Score NucPB1	Localization prob NucPB2	Score diff NucPB2	PEP NucPB2	Score NucPB2	Localization prob NucPB3	Score diff NucPB3	PEP NucPB3	Score NucPB3	Localization prob NucPB4	Score diff NucPB4	PEP NucPB4	Score NucPB4	Diagnostic peak	Number of Lactyl (K)	Amino acid	Sequence window	Modification window
Q16778;P62807;P57053;P06899;O60814;Q99877;Q8N257;Q6DRA6;Q6DN03;Q93079;P23527;P58876;Q99880	21;21;21;21;21;21;21;21;21;21;21;21;21	Q16778;Q93079;P58876;Q99880	Q16778	Histone H2B type 2-E;Histone H2B type 1-C/E/F/G/I;Histone H2B type F-S;Histone H2B type 1-J;Histone H2B type 1-K;Histone H2B type 1-N;Histone H2B type 3-B;Putative histone H2B type 2-D;Putative histone H2B type 2-C;Histone H2B type 1-H;Histone H2B type 1-O;Histone H2B type 1-D;Histone H2B type 1-L	HIST2H2BE;HIST1H2BC;H2BFS;HIST1H2BJ;HIST1H2BK;HIST1H2BN;HIST3H2BB;HIST2H2BD;HIST2H2BC;HIST1H2BH;HIST1H2BO;HIST1H2BD;HIST1H2BL	>sp|Q16778|H2B2E_HUMAN Histone H2B type 2-E OS=Homo sapiens (Human) OX=9606 GN=H2BC21 PE=1 SV=3;>sp|P62807|H2B1C_HUMAN Histone H2B type 1-C/E/F/G/I OS=Homo sapiens (Human) OX=9606 GN=H2BC7 PE=1 SV=4;>sp|P57053|H2BFS_HUMAN Histone H2B type F-S OS=Homo sapie	1	80.562	0	168.26	71.191	168.26	1	65.918	0	155.58	1	80.562	0	168.26	0.999996	54.0019	8.89337e-213	86.472	1	98.5896	0	156.4																		1	K	KSAPAPKKGSKKAVTKAQKKDGKKRKRSRKE	Lactyl (K);X;X;X;X;X;Lactyl (K);X;X;X;X;X;X;X;X;Lactyl (K);X;X;X;X;X;X;X;X;X;X;X;X;X;X;X
Q16778;P62807;P57053;P06899;O60814	6;6;6;6;6	Q16778	Q16778	Histone H2B type 2-E;Histone H2B type 1-C/E/F/G/I;Histone H2B type F-S;Histone H2B type 1-J;Histone H2B type 1-K	HIST2H2BE;HIST1H2BC;H2BFS;HIST1H2BJ;HIST1H2BK	>sp|Q16778|H2B2E_HUMAN Histone H2B type 2-E OS=Homo sapiens (Human) OX=9606 GN=H2BC21 PE=1 SV=3;>sp|P62807|H2B1C_HUMAN Histone H2B type 1-C/E/F/G/I OS=Homo sapiens (Human) OX=9606 GN=H2BC7 PE=1 SV=4;>sp|P57053|H2BFS_HUMAN Histone H2B type F-S OS=Homo sapie	1	76.4432	0	136.7	117.04	136.7	1	76.4432	0	136.7	0.999999	60.5102	0	122.33	1	70.2212	0	114.76	1	70.0417	0	100.93																		1	K	__________MPEPAKSAPAPKKGSKKAVTK	X;X;X;X;X;X;X;X;X;X;X;X;X;X;X;Lactyl (K);X;X;X;X;X;Lactyl (K);X;X;X;X;X;X;X;X;Lactyl (K)
Q16778;P62807;P57053;P06899;O60814;Q99877;Q8N257;P33778	12;12;12;12;12;12;12;12	Q16778	Q16778	Histone H2B type 2-E;Histone H2B type 1-C/E/F/G/I;Histone H2B type F-S;Histone H2B type 1-J;Histone H2B type 1-K;Histone H2B type 1-N;Histone H2B type 3-B;Histone H2B type 1-B	HIST2H2BE;HIST1H2BC;H2BFS;HIST1H2BJ;HIST1H2BK;HIST1H2BN;HIST3H2BB;HIST1H2BB	>sp|Q16778|H2B2E_HUMAN Histone H2B type 2-E OS=Homo sapiens (Human) OX=9606 GN=H2BC21 PE=1 SV=3;>sp|P62807|H2B1C_HUMAN Histone H2B type 1-C/E/F/G/I OS=Homo sapiens (Human) OX=9606 GN=H2BC7 PE=1 SV=4;>sp|P57053|H2BFS_HUMAN Histone H2B type F-S OS=Homo sapie	0.997569	27.1024	6.77644e-141	84.244	51.773	82.417	0.997569	27.1024	6.77644e-141	82.417	0.963834	15.036	4.0043e-62	83.883	0.977151	16.536	0.00225301	64.82	0.905773	9.82845	1.68638e-12	84.244																		1	K	____MPEPAKSAPAPKKGSKKAVTKAQKKDG	X;X;X;X;X;X;X;X;X;X;X;X;X;X;X;Lactyl (K);X;X;X;X;X;X;X;X;Lactyl (K);X;X;X;X;X;X
Q99878;Q96KK5;Q16777;Q93077;Q8IUE6;Q7L7L0;Q6FI13;P20671;P0C0S8;P04908;Q96QV6	10;10;10;10;10;10;10;10;10;10;10	Q99878	Q99878	Histone H2A type 1-J;Histone H2A type 1-H;Histone H2A type 2-C;Histone H2A type 1-C;Histone H2A type 2-B;Histone H2A type 3;Histone H2A type 2-A;Histone H2A type 1-D;Histone H2A type 1;Histone H2A type 1-B/E;Histone H2A type 1-A	HIST1H2AJ;HIST1H2AH;HIST2H2AC;HIST1H2AC;HIST2H2AB;HIST3H2A;HIST2H2AA3;HIST1H2AD;HIST1H2AG;HIST1H2AB;HIST1H2AA	>sp|Q99878|H2A1J_HUMAN Histone H2A type 1-J OS=Homo sapiens (Human) OX=9606 GN=H2AC14 PE=1 SV=3;>sp|Q96KK5|H2A1H_HUMAN Histone H2A type 1-H OS=Homo sapiens (Human) OX=9606 GN=H2AC12 PE=1 SV=3;>sp|Q16777|H2A2C_HUMAN Histone H2A type 2-C OS=Homo sapiens (Hum	0.999999	59.8107	3.50323e-19	71.877	19.194	71.877	0	0		NaN	0.999999	59.8107	3.50323e-19	71.877	0	0		NaN	0	0		NaN																		1	K	______MSGRGKQGGKARAKAKTRSSRAGLQ	X;X;X;X;X;X;X;X;X;X;X;X;X;X;X;Lactyl (K);X;X;X;X;X;X;X;X;X;X;X;X;X;X;X
P05114	5	P05114	P05114	Non-histone chromosomal protein HMG-14	HMGN1	>sp|P05114|HMGN1_HUMAN Non-histone chromosomal protein HMG-14 OS=Homo sapiens (Human) OX=9606 GN=HMGN1 PE=1 SV=3	0.999999	62.8625	1.1593e-22	69.92	50.605	69.92					0.999999	62.8625	1.1593e-22	69.92																										1	K	___________MPKRKVSSAEGAAKEEPKRR	X;X;X;X;X;X;X;X;X;X;X;X;X;X;X;Lactyl (K);X;X;X;X;X;X;X;X;X;X;X;X;X;X;X
P06748	202	P06748	P06748	Nucleophosmin	NPM1	>sp|P06748|NPM_HUMAN Nucleophosmin OS=Homo sapiens (Human) OX=9606 GN=NPM1 PE=1 SV=2	0.999992	50.711	8.182e-06	68.224	52.582	68.224	0.999992	50.711	8.182e-06	68.224	0.999156	30.7348	0.000456786	52.79	0	0		NaN	0	0		NaN																		1	K	EEKAPVKKSIRDTPAKNAQKSNQNGKDSKPS	X;X;X;X;X;X;X;X;X;X;X;X;X;X;X;Lactyl (K);X;X;X;X;X;X;X;X;X;X;X;X;X;X;X
Q71UI9;P0C0S5	5;5	Q71UI9	Q71UI9	Histone H2A.V;Histone H2A.Z	H2AFV;H2AFZ	>sp|Q71UI9|H2AV_HUMAN Histone H2A.V OS=Homo sapiens (Human) OX=9606 GN=H2AZ2 PE=1 SV=3;>sp|P0C0S5|H2AZ_HUMAN Histone H2A.Z OS=Homo sapiens (Human) OX=9606 GN=H2AZ1 PE=1 SV=2	0.999996	54.2905	2.12087e-37	88.029	55.136	88.029	0.999996	54.2905	2.12087e-37	88.029	0	0		NaN	0	0		NaN	0	0		NaN																			K	___________MAGGKAGKDSGKAKAKAVSR	X;X;X;X;X;X;X;X;X;X;X;X;X;X;X;Lactyl (K);X;X;X;X;X;X;X;X;X;X;X;X;X;X;X
Q93079;P23527;Q5QNW6	6;6;6	Q93079	Q93079	Histone H2B type 1-H;Histone H2B type 1-O;Histone H2B type 2-F	HIST1H2BH;HIST1H2BO;HIST2H2BF	>sp|Q93079|H2B1H_HUMAN Histone H2B type 1-H OS=Homo sapiens (Human) OX=9606 GN=H2BC9 PE=1 SV=3;>sp|P23527|H2B1O_HUMAN Histone H2B type 1-O OS=Homo sapiens (Human) OX=9606 GN=H2BC17 PE=1 SV=3;>sp|Q5QNW6|H2B2F_HUMAN Histone H2B type 2-F OS=Homo sapiens (Huma	1	73.5632	0	125.54	108.31	125.54	1	63.725	0	110.08	0.999999	62.1486	0	100.93	1	73.5632	0	125.54	0.999959	43.9174	0.00190734	64.121																		1	K	__________MPDPAKSAPAPKKGSKKAVTK	X;X;X;X;X;X;X;X;X;X;X;X;X;X;X;Lactyl (K);X;X;X;X;X;Lactyl (K);X;X;X;X;X;X;X;X;Lactyl (K)
Q93079;P23527;Q5QNW6	12;12;12	Q93079	Q93079	Histone H2B type 1-H;Histone H2B type 1-O;Histone H2B type 2-F	HIST1H2BH;HIST1H2BO;HIST2H2BF	>sp|Q93079|H2B1H_HUMAN Histone H2B type 1-H OS=Homo sapiens (Human) OX=9606 GN=H2BC9 PE=1 SV=3;>sp|P23527|H2B1O_HUMAN Histone H2B type 1-O OS=Homo sapiens (Human) OX=9606 GN=H2BC17 PE=1 SV=3;>sp|Q5QNW6|H2B2F_HUMAN Histone H2B type 2-F OS=Homo sapiens (Huma	0.997569	27.1024	6.77644e-141	84.244	51.773	82.417	0.997569	27.1024	6.77644e-141	82.417	0.963834	15.036	4.0043e-62	83.883	0.977151	16.536	0.00225301	64.82	0.905773	9.82845	1.68638e-12	84.244																		1	K	____MPDPAKSAPAPKKGSKKAVTKAQKKDG	X;X;X;X;X;X;X;X;X;X;X;X;X;X;X;Lactyl (K);X;X;X;X;X;X;X;X;Lactyl (K);X;X;X;X;X;X
P58876	6	P58876	P58876	Histone H2B type 1-D	HIST1H2BD	>sp|P58876|H2B1D_HUMAN Histone H2B type 1-D OS=Homo sapiens (Human) OX=9606 GN=H2BC5 PE=1 SV=2	1	65.9494	0	95.094	81.285	91.961	1	65.9494	0	91.961	0	0		NaN	1	63.6157	0	95.094																						1	K	__________MPEPTKSAPAPKKGSKKAVTK	X;X;X;X;X;X;X;X;X;X;X;X;X;X;X;Lactyl (K);X;X;X;X;X;Lactyl (K);X;X;X;X;X;X;X;X;Lactyl (K)
P58876	12	P58876	P58876	Histone H2B type 1-D	HIST1H2BD	>sp|P58876|H2B1D_HUMAN Histone H2B type 1-D OS=Homo sapiens (Human) OX=9606 GN=H2BC5 PE=1 SV=2	0.997569	27.1024	6.77644e-141	84.244	51.773	82.417	0.997569	27.1024	6.77644e-141	82.417	0.963834	15.036	4.0043e-62	83.883	0.977151	16.536	0.00225301	64.82	0.905773	9.82845	1.68638e-12	84.244																		1	K	____MPEPTKSAPAPKKGSKKAVTKAQKKDG	X;X;X;X;X;X;X;X;X;X;X;X;X;X;X;Lactyl (K);X;X;X;X;X;X;X;X;Lactyl (K);X;X;X;X;X;X
P62805	9	P62805	P62805	Histone H4	HIST1H4A	>sp|P62805|H4_HUMAN Histone H4 OS=Homo sapiens (Human) OX=9606 GN=H4C2 PE=1 SV=2	1	76.1461	0	94.262	27.269	80.462	1	79.5991	5.1565e-271	88.177	1	74.9018	0	94.262	1	64.7196	9.37161e-263	88.029	1	76.1461	1.34585e-185	84.083																		1	K	_______MSGRGKGGKGLGKGGAKRHRKVLR	X;X;X;X;X;X;X;X;X;X;X;X;X;X;X;Lactyl (K);X;X;X;Lactyl (K);X;X;X;X;X;X;X;X;X;X;X
P62805;Q99525	13;13	P62805	P62805	Histone H4;Histone H4-like protein type G	HIST1H4A;HIST1H4G	>sp|P62805|H4_HUMAN Histone H4 OS=Homo sapiens (Human) OX=9606 GN=H4C2 PE=1 SV=2;>sp|Q99525|H4G_HUMAN Histone H4-like protein type G OS=Homo sapiens (Human) OX=9606 GN=H4C7 PE=1 SV=1	1	72.519	0	98.458	45.521	98.458	0.999996	54.5712	1.19095e-236	87.181	1	67.3273	1.57936e-298	90.37	1	65.4757	1.57936e-298	90.37	1	72.519	0	98.458																		1	K	___MSGRGKGGKGLGKGGAKRHRKVLRDNIQ	X;X;X;X;X;X;X;X;X;X;X;X;X;X;X;Lactyl (K);X;X;X;X;X;X;X;X;X;X;X;X;X;X;X
P84243;Q5TEC6;Q6NXT2;Q71DI3;P68431	24;24;24;24;24	P84243	P84243	Histone H3.3;Histone H3;Histone H3.3C;Histone H3.2;Histone H3.1	H3F3A;HIST2H3PS2;H3F3C;HIST2H3A;HIST1H3A	>sp|P84243|H33_HUMAN Histone H3.3 OS=Homo sapiens (Human) OX=9606 GN=H3-3A PE=1 SV=2;>sp|Q5TEC6|H3PS2_HUMAN Histone HIST2H3PS2 OS=Homo sapiens (Human) OX=9606 GN=H3-2 PE=1 SV=1;>sp|Q6NXT2|H3C_HUMAN Histone H3.3C OS=Homo sapiens (Human) OX=9606 GN=H3-5 PE=1	0.999993	51.7578	3.1568e-08	81.525	33.565	81.525	0	0		NaN	0.999993	51.7578	3.1568e-08	81.525	0	0		NaN	0	0		NaN																			K	RKSTGGKAPRKQLATKAARKSAPSTGGVKKP	X;X;X;X;X;X;X;X;X;X;X;X;X;X;X;Lactyl (K);X;X;X;Lactyl (K);X;X;X;X;X;X;X;X;X;X;X
P84243	28	P84243	P84243	Histone H3.3	H3F3A	>sp|P84243|H33_HUMAN Histone H3.3 OS=Homo sapiens (Human) OX=9606 GN=H3-3A PE=1 SV=2	0.999998	56.5476	0.00191255	56.548	30.105	56.548	0.999998	56.5476	0.00191255	56.548	0	0		NaN																										1	K	GGKAPRKQLATKAARKSAPSTGGVKKPHRYR	X;X;X;X;X;X;X;X;X;X;X;Lactyl (K);X;X;X;Lactyl (K);X;X;X;X;X;X;X;X;X;X;X;X;X;X;X
Q53EL6	115	Q53EL6	Q53EL6	Programmed cell death protein 4	PDCD4	>sp|Q53EL6|PDCD4_HUMAN Programmed cell death protein 4 OS=Homo sapiens (Human) OX=9606 GN=PDCD4 PE=1 SV=2	1	78.8566	8.60611e-206	86.086	18.346	86.086	0	0		NaN	0	0		NaN	1	77.8234	1.00636e-07	82.913	1	78.8566	8.60611e-206	86.086																		1	K	LDRRSRSGKGRGLPKKGGAGGKGVWGTPGQV	X;X;X;X;X;X;X;X;X;X;X;X;X;X;X;Lactyl (K);X;X;X;X;X;X;X;X;X;X;X;X;X;X;X
Q92576	957	Q92576	Q92576	PHD finger protein 3	PHF3	>sp|Q92576|PHF3_HUMAN PHD finger protein 3 OS=Homo sapiens (Human) OX=9606 GN=PHF3 PE=1 SV=3	1	84.0435	9.37161e-263	88.029	18.715	88.029					1	84.0435	9.37161e-263	88.029					1	68.77	8.09452e-21	72.138																		1	K	RLTDSNLKVPEEKAAKVATKIEKELFSFFRD	X;X;X;X;X;X;X;X;X;X;X;X;X;X;X;Lactyl (K);X;X;X;X;X;X;X;X;X;X;X;X;X;X;X
Q99880	6	Q99880	Q99880	Histone H2B type 1-L	HIST1H2BL	>sp|Q99880|H2B1L_HUMAN Histone H2B type 1-L OS=Homo sapiens (Human) OX=9606 GN=H2BC13 PE=1 SV=3	0.999923	41.1234	0.00136829	60.255	49.884	60.255	0.999923	41.1234	0.00136829	60.255					0	0		NaN	0	0		NaN																		1	K	__________MPELAKSAPAPKKGSKKAVTK	X;X;X;X;X;X;X;X;X;X;X;X;X;X;X;Lactyl (K);X;X;X;X;X;Lactyl (K);X;X;X;X;X;X;X;X;Lactyl (K)
Q99880	12	Q99880	Q99880	Histone H2B type 1-L	HIST1H2BL	>sp|Q99880|H2B1L_HUMAN Histone H2B type 1-L OS=Homo sapiens (Human) OX=9606 GN=H2BC13 PE=1 SV=3	0.997569	27.1024	6.77644e-141	84.244	51.773	82.417	0.997569	27.1024	6.77644e-141	82.417	0.963834	15.036	4.0043e-62	83.883	0.977151	16.536	0.00225301	64.82	0.905773	9.82845	1.68638e-12	84.244																		1	K	____MPELAKSAPAPKKGSKKAVTKAQKKDG	X;X;X;X;X;X;X;X;X;X;X;X;X;X;X;Lactyl (K);X;X;X;X;X;X;X;X;Lactyl (K);X;X;X;X;X;X
Q5JVF3	140	Q5JVF3	Q5JVF3	PCI domain-containing protein 2	PCID2	>sp|Q5JVF3|PCID2_HUMAN PCI domain-containing protein 2 OS=Homo sapiens (Human) OX=9606 GN=PCID2 PE=1 SV=2	1	43.1235	4.96074e-23	43.124	27.494	43.124																									1	43.1235	4.96074e-23	43.124						1	K	QLVKKGKSKVGDMLEKAAELLMSCFRVCASD	X;X;X;X;X;X;X;X;X;X;X;X;Oxidation (M);X;X;Lactyl (K);X;X;X;X;X;X;X;X;X;X;X;X;X;X;X
Q8NFY4	523	Q8NFY4	Q8NFY4	Semaphorin-6D	SEMA6D	>sp|Q8NFY4|SEM6D_HUMAN Semaphorin-6D OS=Homo sapiens (Human) OX=9606 GN=SEMA6D PE=1 SV=1	1	46.3705	4.06644e-43	46.37	10.926	46.37					1	46.3705	4.06644e-43	46.37													1	46.3705	4.06644e-43	46.37										1	K	IRIPLSRCERYGSCKKSCIASRDPYCGWLSQ	X;X;X;X;X;X;X;X;X;X;X;X;X;X;X;Lactyl (K);X;X;X;X;X;X;X;X;X;X;X;X;X;X;X
[truncated: 81 more columns]

## Sheet: Table S4
Table S4. Complete list of the lactylation sites identified in the cytoplasmic fraction.
Descriptions of Column Names:
Proteins	Identifiers of proteins this site is associated with
Positions within proteins	For each protein identifier in the 'Proteins' column you find here the psoition of the site in the respective protein sequence
Leading proteins	Top protein identifiers in protein groups
Protein	Identifier of protein this peptide is associated with
Protein names	Names of proteins this peptide is associated with
Gene Names	Names of genes this peptide is associated with
Localization prob	Probability of modification site localization
PEP	The posterior error probability (PEP) of the best identified modified peptide containing this site
Score	The Andromeda score of the best identified modified peptide containing this site
Delta score	The Andromeda delta score of the best identified modified peptide containing this site
Score for localization	The Andromeda score of the MS/MS spectrum used for calculating the localization score for this site
Position in peptide	The position of the modification in the peptide sequence
Charge	Charge state of the precursor ion
m/z	Recalibrated m/z of the precursor ion
Mass error [ppm]	Mass error of the recalibrated mass-over-charge value of the precursor ion in comparison to the predicted monoisotopic mass of the identified peptide sequence
NonNucLB1, NonNucLB2, NonNucLB3, NonNucLB4	Four replicate samples labeled with YnLac
NonNucPB1, NonNucPB2, NonNucPB3, NonNucPB4	Four replicate samples treated with L-lactate
Proteins	Positions within proteins	Leading proteins	Protein	Protein names	Gene names	Fasta headers	Localization prob	Score diff	PEP	Score	Delta score	Score for localization	Localization prob NonNucLB1	Score diff NonNucLB1	PEP NonNucLB1	Score NonNucLB1	Localization prob NonNucLB2	Score diff NonNucLB2	PEP NonNucLB2	Score NonNucLB2	Localization prob NonNucLB3	Score diff NonNucLB3	PEP NonNucLB3	Score NonNucLB3	Localization prob NonNucLB4	Score diff NonNucLB4	PEP NonNucLB4	Score NonNucLB4	Localization prob NonNucPB1	Score diff NonNucPB1	PEP NonNucPB1	Score NonNucPB1	Localization prob NonNucPB2	Score diff NonNucPB2	PEP NonNucPB2	Score NonNucPB2	Localization prob NonNucPB3	Score diff NonNucPB3	PEP NonNucPB3	Score NonNucPB3	Localization prob NonNucPB4	Score diff NonNucPB4	PEP NonNucPB4	Score NonNucPB4	Diagnostic peak	Number of Lactyl (K)	Amino acid	Sequence window	Modification window
A0A024R1R8;Q9Y2S6	59;59	A0A024R1R8	A0A024R1R8	Translation machinery-associated protein 7	hCG_2014768;TMA7	>tr|A0A024R1R8|A0A024R1R8_HUMAN Coiled-coil domain-containing protein 72 OS=Homo sapiens (Human) OX=9606 GN=ENSG00000225528 PE=3 SV=1;>sp|Q9Y2S6|TMA7_HUMAN Translation machinery-associated protein 7 OS=Homo sapiens (Human) OX=9606 GN=TMA7 PE=1 SV=1	0.5	0	0.000429728	53.756	28.197	53.756	0	0		NaN									0.5	0	0.000429728	53.756																		1	K	KAKVVGKGPLATGGIKKSGKK__________	X;X;X;X;X;X;X;X;X;X;X;X;X;X;X;Lactyl (K);X;X;X;X;X;X;X;X;X;X;X;X;X;X;X
A0A024R1R8;Q9Y2S6	60;60	A0A024R1R8	A0A024R1R8	Translation machinery-associated protein 7	hCG_2014768;TMA7	>tr|A0A024R1R8|A0A024R1R8_HUMAN Coiled-coil domain-containing protein 72 OS=Homo sapiens (Human) OX=9606 GN=ENSG00000225528 PE=3 SV=1;>sp|Q9Y2S6|TMA7_HUMAN Translation machinery-associated protein 7 OS=Homo sapiens (Human) OX=9606 GN=TMA7 PE=1 SV=1	0.5	0	0.000429728	53.756	28.197	53.756	0	0		NaN									0.5	0	0.000429728	53.756																		1	K	AKVVGKGPLATGGIKKSGKK___________	X;X;X;X;X;X;X;X;X;X;X;X;X;X;X;X;X;X;X;X;X;X;X;X;X;X;X;X;X;X;X
O00193	174	O00193	O00193	Small acidic protein	SMAP	>sp|O00193|SMAP_HUMAN Small acidic protein OS=Homo sapiens (Human) OX=9606 GN=SMAP PE=1 SV=1	0.99999	49.9847	0.00583565	56.916	46.911	56.916	0	0		NaN	0.99999	49.9847	0.00583565	56.916	0	0		NaN	0	0		NaN																		1	K	EVEDPKNKKDAKSNYKMMFVKSSGS______	X;X;X;X;X;X;X;X;X;X;X;X;X;X;X;Lactyl (K);X;X;X;X;X;X;X;X;X;X;X;X;X;X;X
O15042	88	O15042	O15042	U2 snRNP-associated SURP motif-containing protein	U2SURP	>sp|O15042|SR140_HUMAN U2 snRNP-associated SURP motif-containing protein OS=Homo sapiens (Human) OX=9606 GN=U2SURP PE=1 SV=2	0.952047	12.9784	5.57707e-12	55.314	36.22	55.314													0.952047	12.9784	5.57707e-12	55.314																		1	K	SRPLLENKLKAFSIGKMSTAKRTLSKKEQEE	X;X;X;X;X;X;X;X;X;X;X;X;X;X;X;Lactyl (K);X;X;X;X;X;X;X;X;X;X;X;X;X;X;X
O43719	239	O43719	O43719	HIV Tat-specific factor 1	HTATSF1	>sp|O43719|HTSF1_HUMAN HIV Tat-specific factor 1 OS=Homo sapiens (Human) OX=9606 GN=HTATSF1 PE=1 SV=1	0.999935	41.892	0.0156274	41.892	18.124	41.892	0	0		NaN	0	0		NaN					0.999935	41.892	0.0156274	41.892																			K	YDASKKKKKCKDYKKKLSMQQKQLDWRPERR	X;X;X;X;X;X;X;X;X;X;X;X;X;X;X;Lactyl (K);X;X;X;X;X;X;X;X;X;X;X;X;X;X;X
O43768	107	O43768	O43768	Alpha-endosulfine	ENSA	>sp|O43768|ENSA_HUMAN Alpha-endosulfine OS=Homo sapiens (Human) OX=9606 GN=ENSA PE=1 SV=1	0.999953	43.265	0.0214605	44.753	11.861	44.753									0	0		NaN	0.999953	43.265	0.0214605	44.753																			K	VTGDHIPTPQDLPQRKSSLVTSKLAGGQVE_	X;X;X;X;X;X;X;X;X;X;X;X;X;X;X;Lactyl (K);X;X;X;X;X;X;X;X;X;X;X;X;X;X;X
O43768	80	O43768	O43768	Alpha-endosulfine	ENSA	>sp|O43768|ENSA_HUMAN Alpha-endosulfine OS=Homo sapiens (Human) OX=9606 GN=ENSA PE=1 SV=1	0.99999	49.9341	0.0035582	49.934	36.897	49.934					0	0		NaN	0.99999	49.9341	0.0035582	49.934	0	0		NaN																		1	K	FDSGDYNMAKAKMKNKQLPSAGPDKNLVTGD	X;X;X;X;X;X;X;X;X;X;X;X;X;X;X;Lactyl (K);X;X;X;X;X;X;X;X;X;X;X;X;X;X;X
O60869	23	O60869	O60869	Endothelial differentiation-related factor 1	EDF1	>sp|O60869|EDF1_HUMAN Endothelial differentiation-related factor 1 OS=Homo sapiens (Human) OX=9606 GN=EDF1 PE=1 SV=1	0.73086	4.33915	1.5804e-06	48.532	31.619	48.532	0	0		NaN	0	0		NaN	0	0		NaN	0.73086	4.33915	1.5804e-06	48.532																		1	K	TVTVLRKKGPTAAQAKSKQAILAAQRRGEDV	X;X;X;X;X;X;X;X;X;X;X;X;X;X;X;Lactyl (K);X;Lactyl (K);X;X;X;X;X;X;X;X;X;X;X;X;X
O60869	25	O60869	O60869	Endothelial differentiation-related factor 1	EDF1	>sp|O60869|EDF1_HUMAN Endothelial differentiation-related factor 1 OS=Homo sapiens (Human) OX=9606 GN=EDF1 PE=1 SV=1	1	74.8411	3.40517e-14	74.841	38.446	74.841	0	0		NaN	1	48.998	0.00968361	48.998	1	66.0557	0.00021165	66.056	1	74.8411	3.40517e-14	74.841																		1	K	TVLRKKGPTAAQAKSKQAILAAQRRGEDVET	X;X;X;X;X;X;X;X;X;X;X;X;X;X;X;Lactyl (K);X;X;X;X;X;X;X;X;X;X;X;X;X;X;X
O75937	231	O75937	O75937	DnaJ homolog subfamily C member 8	DNAJC8	>sp|O75937|DNJC8_HUMAN DnaJ homolog subfamily C member 8 OS=Homo sapiens (Human) OX=9606 GN=DNAJC8 PE=1 SV=2	0.898304	9.46121	6.83139e-28	80.688	55.794	74.173	0.898304	9.46121	4.08168e-19	74.173	0.863822	8.02316	0.0118075	61.78	0.847693	7.45518	6.83139e-28	80.688	0	0		NaN																		1	K	RDGRVDSWRNFQANTKGKKEKKNRTFLRPPK	X;X;X;X;X;X;X;X;X;X;X;X;X;X;X;Lactyl (K);X;X;X;X;X;X;X;X;X;X;X;X;X;X;X
P05455	354	P05455	P05455	Lupus La protein	SSB	>sp|P05455|LA_HUMAN Lupus La protein OS=Homo sapiens (Human) OX=9606 GN=SSB PE=1 SV=2	1	94.3457	2.7841e-155	98.458	74.503	98.458	1	94.3457	2.7841e-155	98.458	0	0		NaN	0	0		NaN	1	73.6344	2.69316e-27	75.692																		1	K	KGKGNKAAQPGSGKGKVQFQGKKTKFASDDE	X;X;X;X;X;X;X;X;X;X;X;X;X;X;X;Lactyl (K);X;X;X;X;X;X;X;X;X;X;X;X;X;X;X
P06748	202	P06748	P06748	Nucleophosmin	NPM1	>sp|P06748|NPM_HUMAN Nucleophosmin OS=Homo sapiens (Human) OX=9606 GN=NPM1 PE=1 SV=2	0.999623	34.2312	1.52605e-12	74.301	36.743	67.494	0.996343	24.3532	0.000610937	64.42	0.999623	34.2312	5.19609e-05	67.494	0.999325	31.7023	1.52605e-12	74.301	0	0		NaN																		1	K	EEKAPVKKSIRDTPAKNAQKSNQNGKDSKPS	X;X;X;X;X;X;X;X;X;X;X;X;X;X;X;Lactyl (K);X;X;X;X;X;X;X;X;X;X;X;X;X;X;X
P06748;Q9NYF8	233;725	P06748;Q9NYF8	P06748	Nucleophosmin;Bcl-2-associated transcription factor 1	NPM1;BCLAF1	>sp|P06748|NPM_HUMAN Nucleophosmin OS=Homo sapiens (Human) OX=9606 GN=NPM1 PE=1 SV=2;>sp|Q9NYF8|BCLF1_HUMAN Bcl-2-associated transcription factor 1 OS=Homo sapiens (Human) OX=9606 GN=BCLAF1 PE=1 SV=2	0.999996	54.0381	0	116.25	67.19	109.71	0.999996	54.0381	9.10256e-222	109.71	0.999992	52.1834	1.76841e-146	101.54	0.999988	49.451	0	116.25	0.999976	46.3379	3.00258e-250	112.41																		1	K	DSKGSRESSGSRKQEKTPKDYKEYKSYKDDS;STPRSKGQESFKKQEKTPKTPKGPSSVEDIK	X;X;X;X;X;Lactyl (K);X;X;X;X;X;X;X;X;X;Lactyl (K);X;X;X;X;X;Lactyl (K);X;X;X;X;X;X;X;X;X
P06748	141	P06748	P06748	Nucleophosmin	NPM1	>sp|P06748|NPM_HUMAN Nucleophosmin OS=Homo sapiens (Human) OX=9606 GN=NPM1 PE=1 SV=2	1	41.4482	0.00798037	60.91	11.552	41.448	1	60.9103	0.00798037	60.91	0	0		NaN	1	47.5743	0.0165744	47.574	1	41.4482	0.00823942	41.448																		1	K	EDEEEEDVKLLSISGKRSAPGGGSKVPQKKV	X;X;X;X;X;X;X;X;X;X;X;X;X;X;X;Lactyl (K);X;X;X;X;X;X;X;X;Lactyl (K);X;X;X;X;X;X
P06748	150	P06748	P06748	Nucleophosmin	NPM1	>sp|P06748|NPM_HUMAN Nucleophosmin OS=Homo sapiens (Human) OX=9606 GN=NPM1 PE=1 SV=2	0.998655	28.7084	3.23307e-05	51.286	36.275	51.286									0.997304	25.6808	0.00168473	42.031	0.998655	28.7084	3.23307e-05	51.286									0	0		NaN						1	K	LLSISGKRSAPGGGSKVPQKKVKLAADEDDD	X;X;X;X;X;X;Lactyl (K);X;X;X;X;X;X;X;X;Lactyl (K);X;X;X;X;X;X;X;X;X;X;X;X;X;X;X
P06748	223	P06748	P06748	Nucleophosmin	NPM1	>sp|P06748|NPM_HUMAN Nucleophosmin OS=Homo sapiens (Human) OX=9606 GN=NPM1 PE=1 SV=2	1	89.0301	5.66181e-88	91.867	35.745	91.867	0	0		NaN	1	89.0301	5.66181e-88	91.867	0	0		NaN	1	66.7615	0.000566061	69.598																		1	K	NQNGKDSKPSSTPRSKGQESFKKQEKTPKTP	X;X;X;X;X;X;X;X;X;X;X;X;X;X;X;Lactyl (K);X;X;X;X;X;X;X;X;X;Lactyl (K);X;X;X;X;X
P06748	239	P06748	P06748	Nucleophosmin	NPM1	>sp|P06748|NPM_HUMAN Nucleophosmin OS=Homo sapiens (Human) OX=9606 GN=NPM1 PE=1 SV=2	0.999998	56.8913	1.66485e-05	61.235	37.28	61.235	0	0		NaN	0.999986	48.6063	1.66485e-05	52.576	0.999998	56.8913	0.00325198	61.235	0.999995	53.2486	5.9563e-05	55.261																		1	K	GQESFKKQEKTPKTPKGPSSVEDIKAKMQAS	X;X;X;X;X;X;X;X;X;Lactyl (K);X;X;X;X;X;Lactyl (K);X;X;X;X;X;X;X;X;X;X;X;X;X;X;X
P07910;A0A0G2JPF8;P0DMR1;O60812;B7ZW38;B2RXH8	157;144;144;144;144;144	P07910	P07910	Heterogeneous nuclear ribonucleoproteins C1/C2;Heterogeneous nuclear ribonucleoprotein C-like 4;Heterogeneous nuclear ribonucleoprotein C-like 1;Heterogeneous nuclear ribonucleoprotein C-like 3;Heterogeneous nuclear ribonucleoprotein C-like 2	HNRNPC;HNRNPCL4;HNRNPCL1;HNRNPCL3;HNRNPCL2	>sp|P07910|HNRPC_HUMAN Heterogeneous nuclear ribonucleoproteins C1/C2 OS=Homo sapiens (Human) OX=9606 GN=HNRNPC PE=1 SV=4;>tr|A0A0G2JPF8|A0A0G2JPF8_HUMAN RRM domain-containing protein OS=Homo sapiens (Human) OX=9606 GN=HNRNPCL4 PE=3 SV=1;>sp|P0DMR1|HNRC4_H	1	86.8662	7.10685e-79	86.866	29.764	86.866	0	0		NaN	1	83.6143	1.2136e-63	83.614	1	74.4152	3.72906e-23	74.415	1	86.8662	7.10685e-79	86.866																			K	RVPPPPPIARAVVPSKRQRVSGNTSRRGKSG	X;X;X;X;X;X;X;X;X;X;X;X;X;X;X;Lactyl (K);X;X;X;X;X;X;X;X;X;X;X;X;X;X;X
P07910	94	P07910	P07910	Heterogeneous nuclear ribonucleoproteins C1/C2	HNRNPC	>sp|P07910|HNRPC_HUMAN Heterogeneous nuclear ribonucleoproteins C1/C2 OS=Homo sapiens (Human) OX=9606 GN=HNRNPC PE=1 SV=4	0.999997	55.9849	0.0196069	64.757	26.624	64.757	0	0		NaN	0	0		NaN	0	0		NaN	0.999997	55.9849	0.0196069	64.757																		1	K	VLDINLAAEPKVNRGKAGVKRSAAEMYGSVT	X;X;X;X;X;X;X;X;X;X;X;X;X;X;X;Lactyl (K);X;X;X;X;X;X;X;X;X;X;X;X;X;X;X
P07910	176	P07910	P07910	Heterogeneous nuclear ribonucleoproteins C1/C2	HNRNPC	>sp|P07910|HNRPC_HUMAN Heterogeneous nuclear ribonucleoproteins C1/C2 OS=Homo sapiens (Human) OX=9606 GN=HNRNPC PE=1 SV=4	1	93.8392	1.23414e-133	93.839	83.12	93.839	0	0		NaN	1	72.2004	4.0805e-18	72.2	1	93.8392	1.23414e-133	93.839	0	0		NaN																			K	VSGNTSRRGKSGFNSKSGQRGSSKSGKLKGD	X;X;X;X;X;X;X;X;X;X;X;X;X;X;X;Lactyl (K);X;X;X;X;X;X;X;X;X;X;X;X;X;X;X
P09429;B2RPK0	177;177	P09429	P09429	High mobility group protein B1;Putative high mobility group protein B1-like 1	HMGB1;HMGB1P1	>sp|P09429|HMGB1_HUMAN High mobility group protein B1 OS=Homo sapiens (Human) OX=9606 GN=HMGB1 PE=1 SV=3;>sp|B2RPK0|HGB1A_HUMAN Putative high mobility group protein B1-like 1 OS=Homo sapiens (Human) OX=9606 GN=HMGB1P1 PE=5 SV=1	0.999999	60.1877	0	120.31	68.519	120.31	0.992402	22.0437	0.017585	47.603	0	0		NaN	0	0		NaN	0.999999	60.1877	0	120.31																		1	K	YRAKGKPDAAKKGVVKAEKSKKKKEEEEDEE	X;X;X;X;X;X;X;X;X;X;X;X;X;X;X;Lactyl (K);X;X;X;X;X;X;X;X;X;X;X;X;X;X;X
P09651	3	P09651	P09651	Heterogeneous nuclear ribonucleoprotein A1;Heterogeneous nuclear ribonucleoprotein A1, N-terminally processed	HNRNPA1	>sp|P09651|ROA1_HUMAN Heterogeneous nuclear ribonucleoprotein A1 OS=Homo sapiens (Human) OX=9606 GN=HNRNPA1 PE=1 SV=5	0.999995	53.3856	7.82103e-06	63.185	50.177	63.185	0	0		NaN	0	0		NaN	0.999995	53.3856	7.82103e-06	63.185																						1	K	_____________MSKSESPKEPEQLRKLFI	X;X;X;X;X;X;X;X;X;X;X;X;X;X;X;Lactyl (K);X;X;X;X;X;X;X;X;X;X;X;X;X;X;X
P09661	172	P09661	P09661	U2 small nuclear ribonucleoprotein A'	SNRPA1	>sp|P09661|RU2A_HUMAN U2 small nuclear ribonucleoprotein A' OS=Homo sapiens (Human) OX=9606 GN=SNRPA1 PE=1 SV=2	1	57.785	0.0107642	57.785	42.525	57.785	1	49.3004	0.0107642	49.3	1	57.785	0.0188211	57.785					1	57.785	0.0188211	57.785																		1	K	EAEKMFKGKRGAQLAKDIARRSKTFNPGAGL	X;X;X;X;X;X;X;X;X;X;X;X;X;X;X;Lactyl (K);X;X;X;X;X;X;X;X;X;X;X;X;X;X;X
P09874	498	P09874	P09874	Poly [ADP-ribose] polymerase 1	PARP1	>sp|P09874|PARP1_HUMAN Poly [ADP-ribose] polymerase 1 OS=Homo sapiens (Human) OX=9606 GN=PARP1 PE=1 SV=4	1	81.4254	2.65826e-48	82.008	50.073	82.008													1	81.4254	2.65826e-48	82.008																			K	AEVKAEPVEVVAPRGKSGAALSKKSKGQVKE	X;X;X;X;X;X;X;X;X;X;X;X;X;X;X;Lactyl (K);X;X;X;X;X;X;Lactyl (K);Lactyl (K);X;X;X;X;X;X;X
P09874	505	P09874	P09874	Poly [ADP-ribose] polymerase 1	PARP1	>sp|P09874|PARP1_HUMAN Poly [ADP-ribose] polymerase 1 OS=Homo sapiens (Human) OX=9606 GN=PARP1 PE=1 SV=4	0.691735	3.51016	0.0046151	64.42	37.283	64.42	0.5	0	0.00504922	57.59					0.691735	3.51016	0.0046151	64.42																						1	K	VEVVAPRGKSGAALSKKSKGQVKEEGINKSE	X;X;X;X;X;X;X;X;X;X;X;X;X;X;X;Lactyl (K);X;X;X;X;X;X;X;X;X;X;X;X;X;X;X
P09874	506	P09874	P09874	Poly [ADP-ribose] polymerase 1	PARP1	>sp|P09874|PARP1_HUMAN Poly [ADP-ribose] polymerase 1 OS=Homo sapiens (Human) OX=9606 GN=PARP1 PE=1 SV=4	0.571244	1.24612	0.00504922	57.59	32.752	50.04	0.5	0	0.00504922	57.59	0.546199	0.804856	0.0203303	40.352					0.571244	1.24612	0.0251497	50.04																		1	K	EVVAPRGKSGAALSKKSKGQVKEEGINKSEK	X;X;X;X;X;X;X;Lactyl (K);X;X;X;X;X;X;X;Lactyl (K);X;X;X;X;X;X;X;X;X;X;X;X;X;X;X
P17844	523	P17844	P17844	Probable ATP-dependent RNA helicase DDX5	DDX5	>sp|P17844|DDX5_HUMAN Probable ATP-dependent RNA helicase DDX5 OS=Homo sapiens (Human) OX=9606 GN=DDX5 PE=1 SV=1	1	52.7161	0.00761281	61.962	32.813	52.716	1	55.5305	0.0135634	55.531	1	61.9623	0.00761281	61.962	1	53.9678	0.014535	53.968	1	52.7161	0.0196239	52.716																		1	K	FRDRENYDRGYSSLLKRDFGAKTQNGVYSAA	X;X;X;X;X;X;X;X;X;X;X;X;X;X;X;Lactyl (K);X;X;X;X;X;X;X;X;X;X;X;X;X;X;X
P17844	33	P17844	P17844	Probable ATP-dependent RNA helicase DDX5	DDX5	>sp|P17844|DDX5_HUMAN Probable ATP-dependent RNA helicase DDX5 OS=Homo sapiens (Human) OX=9606 GN=DDX5 PE=1 SV=1	0.999999	62.5462	0.000883723	62.546	30.076	62.546	0.999963	44.3492	0.0203455	44.349	0	0		NaN	0.999999	62.5462	0.000883723	62.546	0.999997	55.37	0.0136632	55.37																		1	K	APRFGGSRAGPLSGKKFGNPGEKLVKKKWNL	X;X;X;X;X;X;X;X;X;X;X;X;X;X;X;Lactyl (K);X;X;X;X;X;X;X;X;X;X;X;X;X;X;X
P19338	95	P19338	P19338	Nucleolin	NCL	>sp|P19338|NUCL_HUMAN Nucleolin OS=Homo sapiens (Human) OX=9606 GN=NCL PE=1 SV=3	0.5	0	0.00565823	63.565	33.822	63.565	0.5	0	0.0134729	55.676	0.5	0	0.0160563	48.561	0.5	0	0.0134729	55.676	0.5	0	0.00565823	63.565																		1	K	KAAVTPGKKAAATPAKKTVTPAKAVTTPGKK	Lactyl (K);X;X;X;X;X;X;Lactyl (K);X;X;X;X;X;X;X;Lactyl (K);Lactyl (K);X;X;X;X;X;Lactyl (K);X;X;X;X;X;X;X;Lactyl (K)
P19338	96	P19338	P19338	Nucleolin	NCL	>sp|P19338|NUCL_HUMAN Nucleolin OS=Homo sapiens (Human) OX=9606 GN=NCL PE=1 SV=3	1	67.9808	0.00248219	67.981	34.43	67.981	0.5	0	0.0134729	55.676	0.5	0	0.0160563	48.561	1	65.2521	0.0134729	65.252	1	67.9808	0.00248219	67.981																		1	K	AAVTPGKKAAATPAKKTVTPAKAVTTPGKKG	X;X;X;X;X;X;Lactyl (K);Lactyl (K);X;X;X;X;X;X;X;Lactyl (K);X;X;X;X;X;Lactyl (K);X;X;X;X;X;X;X;Lactyl (K);X
P19338	223	P19338	P19338	Nucleolin	NCL	>sp|P19338|NUCL_HUMAN Nucleolin OS=Homo sapiens (Human) OX=9606 GN=NCL PE=1 SV=3	1	93.8039	1.09679e-204	103.83	52.867	103.83	1	85.4421	5.65181e-113	93.374	1	93.8039	1.09679e-204	103.83	0	0		NaN	0	0		NaN																			K	EEAMETTPAKGKKAAKVVPVKAKNVAEDEDE	X;X;X;X;X;X;X;X;X;X;X;X;X;X;X;Lactyl (K);X;X;X;X;X;X;X;X;X;X;X;X;X;X;X
P19338	87	P19338	P19338	Nucleolin	NCL	>sp|P19338|NUCL_HUMAN Nucleolin OS=Homo sapiens (Human) OX=9606 GN=NCL PE=1 SV=3	0.81861	6.54465	0.0207502	46.813	25.131	46.813									0.81861	6.54465	0.0207502	46.813	0	0		NaN																		1	K	VAVATPAKKAAVTPGKKAAATPAKKTVTPAK	X;X;X;X;X;X;X;Lactyl (K);Lactyl (K);X;X;X;X;X;X;Lactyl (K);Lactyl (K);X;X;X;X;X;X;Lactyl (K);Lactyl (K);X;X;X;X;X;Lactyl (K)
P19338	88	P19338	P19338	Nucleolin	NCL	>sp|P19338|NUCL_HUMAN Nucleolin OS=Homo sapiens (Human) OX=9606 GN=NCL PE=1 SV=3	1	71.8097	9.53281e-27	78.113	48.775	78.113	0.999999	62.5462	0.00211562	62.546	0.999879	40.6858	0.00427547	45.022	1	71.3794	2.36848e-13	71.379	1	71.8097	9.53281e-27	78.113																		1	K	AVATPAKKAAVTPGKKAAATPAKKTVTPAKA	X;X;X;X;X;X;Lactyl (K);Lactyl (K);X;X;X;X;X;X;X;Lactyl (K);X;X;X;X;X;X;Lactyl (K);Lactyl (K);X;X;X;X;X;Lactyl (K);X
P19338	9	P19338	P19338	Nucleolin	NCL	>sp|P19338|NUCL_HUMAN Nucleolin OS=Homo sapiens (Human) OX=9606 GN=NCL PE=1 SV=3	0.999999	62.3357	3.27658e-05	68.371	42.325	68.371	0	0		NaN	0	0		NaN	0	0		NaN	0.999999	62.3357	3.27658e-05	68.371																		1	K	_______MVKLAKAGKNQGDPKKMAPPPKEV	X;X;X;X;X;X;X;X;X;X;X;X;X;X;X;Lactyl (K);X;X;X;X;X;X;X;X;X;X;X;X;X;X;X
P19338	124	P19338	P19338	Nucleolin	NCL	>sp|P19338|NUCL_HUMAN Nucleolin OS=Homo sapiens (Human) OX=9606 GN=NCL PE=1 SV=3	0.5	0	1.01664e-75	89.698	66.679	89.698	0.5	0	0.00126375	57.859	0	0		NaN	0.5	0	6.60219e-27	78.516	0.5	0	1.01664e-75	89.698																		1	K	KKGATPGKALVATPGKKGAAIPAKGAKNGKN	X;Lactyl (K);X;X;X;X;X;X;X;X;X;X;X;X;X;Lactyl (K);Lactyl (K);X;X;X;X;X;X;X;X;X;X;X;X;X;X
P19338	125	P19338	P19338	Nucleolin	NCL	>sp|P19338|NUCL_HUMAN Nucleolin OS=Homo sapiens (Human) OX=9606 GN=NCL PE=1 SV=3	1	63.0043	2.77178e-228	109.11	79.961	64.265	0.999983	47.5743	0.00126375	57.859	0.999958	43.8078	2.77178e-228	109.11	1	63.0043	6.60219e-27	78.516	0.999964	44.4023	1.01664e-75	89.698																		1	K	KGATPGKALVATPGKKGAAIPAKGAKNGKNA	Lactyl (K);X;X;X;X;X;Lactyl (K);X;X;X;X;X;X;X;X;Lactyl (K);X;X;X;X;X;X;X;X;X;X;X;X;X;X;X
P19338	110	P19338	P19338	Nucleolin	NCL	>sp|P19338|NUCL_HUMAN Nucleolin OS=Homo sapiens (Human) OX=9606 GN=NCL PE=1 SV=3	0.999999	60.2717	1.6911e-12	73.26	25.411	73.26									0	0		NaN	0.999999	60.2717	1.6911e-12	73.26																		1	K	KKTVTPAKAVTTPGKKGATPGKALVATPGKK	Lactyl (K);Lactyl (K);X;X;X;X;X;Lactyl (K);X;X;X;X;X;X;X;Lactyl (K);X;X;X;X;X;Lactyl (K);X;X;X;X;X;X;X;Lactyl (K);Lactyl (K)
P19338	116	P19338	P19338	Nucleolin	NCL	>sp|P19338|NUCL_HUMAN Nucleolin OS=Homo sapiens (Human) OX=9606 GN=NCL PE=1 SV=3	0.999967	44.8119	9.88975e-12	56.872	43.809	52.527					0	0		NaN	0.999967	44.8119	5.47e-06	52.527	0.981933	17.3549	9.88975e-12	56.872																		1	K	AKAVTTPGKKGATPGKALVATPGKKGAAIPA	X;Lactyl (K);X;X;X;X;X;X;X;Lactyl (K);X;X;X;X;X;Lactyl (K);X;X;X;X;X;X;X;Lactyl (K);Lactyl (K);X;X;X;X;X;X
P19338	55	P19338	P19338	Nucleolin	NCL	>sp|P19338|NUCL_HUMAN Nucleolin OS=Homo sapiens (Human) OX=9606 GN=NCL PE=1 SV=3	1	118.359	0	122.28	72.691	122.28	0.999996	54.4105	0.0132632	56.013	1	73.6597	1.91106e-11	74.92	1	81.3414	1.15321e-33	81.972	1	118.359	0	122.28																		1	K	DSSGEEVVIPQKKGKKAAATSAKKVVVSPTK	X;X;X;X;X;X;X;X;X;X;X;X;X;X;X;Lactyl (K);X;X;X;X;X;X;X;Lactyl (K);X;X;X;X;X;X;X
P19338	63	P19338	P19338	Nucleolin	NCL	>sp|P19338|NUCL_HUMAN Nucleolin OS=Homo sapiens (Human) OX=9606 GN=NCL PE=1 SV=3	1	86.1356	2.72861e-77	86.136	30.766	86.136	1	86.1356	2.72861e-77	86.136	0.999998	57.5896	0.00504922	57.59	1	64.6536	6.23273e-05	64.654	0	0		NaN																		1	K	IPQKKGKKAAATSAKKVVVSPTKKVAVATPA	X;X;X;X;X;X;X;Lactyl (K);X;X;X;X;X;X;X;Lactyl (K);X;X;X;X;X;X;X;Lactyl (K);X;X;X;X;X;X;X
P19338	80	P19338	P19338	Nucleolin	NCL	>sp|P19338|NUCL_HUMAN Nucleolin OS=Homo sapiens (Human) OX=9606 GN=NCL PE=1 SV=3	1	67.5321	1.64005e-228	109.71	54.184	70.056	1	64.4204	2.17321e-05	66.692	1	67.5321	1.64005e-228	109.71	0.999977	46.3899	0.01272	51.066	0	0		NaN																		1	K	VVSPTKKVAVATPAKKAAVTPGKKAAATPAK	X;X;X;X;X;X;Lactyl (K);X;X;X;X;X;X;X;X;Lactyl (K);X;X;X;X;X;X;Lactyl (K);Lactyl (K);X;X;X;X;X;X;Lactyl (K)
P19338	102	P19338	P19338	Nucleolin	NCL	>sp|P19338|NUCL_HUMAN Nucleolin OS=Homo sapiens (Human) OX=9606 GN=NCL PE=1 SV=3	1	63.88	1.55126e-87	90.412	62.129	90.412	1	63.88	1.55126e-87	90.412	0	0		NaN	0.999693	35.1228	1.51147e-05	46.069																						1	K	KKAAATPAKKTVTPAKAVTTPGKKGATPGKA	Lactyl (K);Lactyl (K);X;X;X;X;X;X;Lactyl (K);X;X;X;X;X;X;Lactyl (K);X;X;X;X;X;X;X;Lactyl (K);X;X;X;X;X;Lactyl (K);X
P19338	71	P19338	P19338	Nucleolin	NCL	>sp|P19338|NUCL_HUMAN Nucleolin OS=Homo sapiens (Human) OX=9606 GN=NCL PE=1 SV=3	1	68.5575	4.32874e-06	68.557	52.018	68.557	0	0		NaN					1	68.5575	4.32874e-06	68.557	0.999989	49.7151	0.0101062	49.715																		1	K	AAATSAKKVVVSPTKKVAVATPAKKAAVTPG	X;X;X;X;X;X;X;Lactyl (K);X;X;X;X;X;X;X;Lactyl (K);X;X;X;X;X;X;X;Lactyl (K);Lactyl (K);X;X;X;X;X;X
P19338	79	P19338	P19338	Nucleolin	NCL	>sp|P19338|NUCL_HUMAN Nucleolin OS=Homo sapiens (Human) OX=9606 GN=NCL PE=1 SV=3	0.909356	10.014	0	123.72	55.74	123.72													0.909356	10.014	0	123.72																		1	K	VVVSPTKKVAVATPAKKAAVTPGKKAAATPA	X;X;X;X;X;X;X;X;X;X;X;X;X;X;X;Lactyl (K);Lactyl (K);X;X;X;X;X;X;Lactyl (K);Lactyl (K);X;X;X;X;X;X
P27694	163	P27694	P27694	Replication protein A 70 kDa DNA-binding subunit;Replication protein A 70 kDa DNA-binding subunit, N-terminally processed	RPA1	>sp|P27694|RFA1_HUMAN Replication protein A 70 kDa DNA-binding subunit OS=Homo sapiens (Human) OX=9606 GN=RPA1 PE=1 SV=2	0.995177	23.1461	1.72407e-18	73.499	55.275	73.499	0.995177	23.1461	1.72407e-18	73.499					0	0		NaN	0.995177	23.1461	1.72407e-18	73.499																			K	SSGMGSTVSKAYGASKTFGKAAGPSLSHTSG	X;X;X;X;X;X;X;X;X;X;X;X;X;X;X;Lactyl (K);X;X;X;X;X;X;X;X;X;X;X;X;X;X;X
P27694	88	P27694	P27694	Replication protein A 70 kDa DNA-binding subunit;Replication protein A 70 kDa DNA-binding subunit, N-terminally processed	RPA1	>sp|P27694|RFA1_HUMAN Replication protein A 70 kDa DNA-binding subunit OS=Homo sapiens (Human) OX=9606 GN=RPA1 PE=1 SV=2	1	47.3018	0.00233473	56.404	46.4	47.302	1	56.4044	0.00233473	56.404	1	47.3018	0.00974291	47.302																										1	K	SNCVCQIHRFIVNTLKDGRRVVILMELEVLK	X;X;X;X;X;X;X;X;X;X;X;X;X;X;X;Lactyl (K);X;X;X;X;X;X;X;X;X;X;X;X;X;X;X
P37108	43	P37108	P37108	Signal recognition particle 14 kDa protein	SRP14	>sp|P37108|SRP14_HUMAN Signal recognition particle 14 kDa protein OS=Homo sapiens (Human) OX=9606 GN=SRP14 PE=1 SV=2	0.999965	44.5108	1.89752e-05	44.511	34.711	44.511	0	0		NaN	0.999965	44.5108	1.89752e-05	44.511	0	0		NaN	0	0		NaN																		1	K	ITLKKYDGRTKPIPKKGTVEGFEPADNKCLL	X;X;X;X;X;X;X;X;X;X;X;X;X;X;X;Lactyl (K);X;X;X;X;X;X;X;X;X;X;X;X;X;X;X
P39748	361	P39748	P39748	Flap endonuclease 1	FEN1	>sp|P39748|FEN1_HUMAN Flap endonuclease 1 OS=Homo sapiens (Human) OX=9606 GN=FEN1 PE=1 SV=1	0.99793	27.236	0.000281728	50.354	26.677	50.354	0	0		NaN					0.99793	27.236	0.000281728	50.354																						1	K	VTGSLSSAKRKEPEPKGSTKKKAKTGAAGKF	X;X;X;X;X;X;X;X;X;X;X;X;X;X;X;Lactyl (K);X;X;X;X;X;X;X;X;X;X;X;X;X;X;X
P43243	702	P43243	P43243	Matrin-3	MATR3	>sp|P43243|MATR3_HUMAN Matrin-3 OS=Homo sapiens (Human) OX=9606 GN=MATR3 PE=1 SV=2	0.999998	57.5318	1.16292e-15	57.532	28.383	57.532													0.999998	57.5318	1.16292e-15	57.532																		1	K	VASDGKKEPSDKAVKKDGSASAAAKKKLKKV	X;X;X;X;X;X;X;X;X;X;X;X;X;X;X;Lactyl (K);X;X;X;X;X;X;X;X;X;X;X;X;X;X;X
P51965	43	P51965	P51965	Ubiquitin-conjugating enzyme E2 E1	UBE2E1	>sp|P51965|UB2E1_HUMAN Ubiquitin-conjugating enzyme E2 E1 OS=Homo sapiens (Human) OX=9606 GN=UBE2E1 PE=1 SV=1	1	62.9759	0.00044788	64.82	45.034	64.82	0	0		NaN	1	62.9759	0.00044788	64.82	0.999996	53.4718	0.0234437	58.172	0	0		NaN																		1	K	TPKKKESKVSMSKNSKLLSTSAKRIQKELAD	X;X;X;X;X;X;X;X;X;X;X;X;X;X;X;Lactyl (K);X;X;X;X;X;X;X;X;X;X;X;X;X;X;X
P52597	224	P52597	P52597	Heterogeneous nuclear ribonucleoprotein F;Heterogeneous nuclear ribonucleoprotein F, N-terminally processed	HNRNPF	>sp|P52597|HNRPF_HUMAN Heterogeneous nuclear ribonucleoprotein F OS=Homo sapiens (Human) OX=9606 GN=HNRNPF PE=1 SV=3	1	71.1757	6.9241e-22	73.435	48.582	71.176	1	51.2862	3.23307e-05	51.286	1	73.4351	6.9241e-22	73.435	1	48.5679	2.24921e-05	48.568	1	71.1757	4.62257e-15	71.176																		1	K	PYDRPGTARRYIGIVKQAGLERMRPGAYSTG	X;X;X;X;X;X;X;X;X;X;X;X;X;X;X;Lactyl (K);X;X;X;X;X;X;X;X;X;X;X;X;X;X;X
P53999	53	P53999	P53999	Activated RNA polymerase II transcriptional coactivator p15	SUB1	>sp|P53999|TCP4_HUMAN Activated RNA polymerase II transcriptional coactivator p15 OS=Homo sapiens (Human) OX=9606 GN=SUB1 PE=1 SV=3	1	80.6901	2.47145e-38	80.69	53.209	80.69	0	0		NaN	0	0		NaN	0	0		NaN	1	80.6901	2.47145e-38	80.69																		1	K	KKQKTGETSRALSSSKQSSSSRDDNMFQIGK	X;X;X;X;X;X;X;X;X;X;X;X;X;X;X;Lactyl (K);X;X;X;X;X;X;X;X;X;X;X;X;X;X;X
P53999	29	P53999	P53999	Activated RNA polymerase II transcriptional coactivator p15	SUB1	>sp|P53999|TCP4_HUMAN Activated RNA polymerase II transcriptional coactivator p15 OS=Homo sapiens (Human) OX=9606 GN=SUB1 PE=1 SV=3	0.997823	29.9655	0.00245052	40.154	21.197	40.154	0	0		NaN	0	0		NaN	0	0		NaN	0.997823	29.9655	0.00245052	40.154																		1	K	GSDSDSEVDKKLKRKKQVAPEKPVKKQKTGE	X;X;X;X;X;X;X;X;X;X;X;X;X;X;X;Lactyl (K);X;X;X;X;X;X;X;X;X;X;X;X;X;X;X
P61978	405	P61978	P61978	Heterogeneous nuclear ribonucleoprotein K	HNRNPK	>sp|P61978|HNRPK_HUMAN Heterogeneous nuclear ribonucleoprotein K OS=Homo sapiens (Human) OX=9606 GN=HNRNPK PE=1 SV=1	1	49.4481	5.74067e-06	55.261	41.861	49.448	1	41.2419	0.00115663	41.242	1	55.2612	1.23843e-05	55.261	1	49.4481	5.74067e-06	49.448	0	0		NaN																		1	K	TQVTIPKDLAGSIIGKGGQRIKQIRHESGAS	X;X;X;X;X;X;X;X;X;X;X;X;X;X;X;Lactyl (K);X;X;X;X;X;X;X;X;X;X;X;X;X;X;X
P62304	12	P62304	P62304	Small nuclear ribonucleoprotein E	SNRPE	>sp|P62304|RUXE_HUMAN Small nuclear ribonucleoprotein E OS=Homo sapiens (Human) OX=9606 GN=SNRPE PE=1 SV=1	1	59.2273	1.03706e-05	59.227	51.66	59.227					1	59.2273	1.03706e-05	59.227					0	0		NaN																		1	K	____MAYRGQGQKVQKVMVQPINLIFRYLQN	X;X;X;X;X;X;X;X;X;X;X;X;X;X;X;Lactyl (K);X;X;X;X;X;X;X;X;X;X;X;X;X;X;X
Q5VTE0;P68104;Q05639	457;457;457	Q5VTE0	Q5VTE0	Putative elongation factor 1-alpha-like 3;Elongation factor 1-alpha 1;Elongation factor 1-alpha 2	EEF1A1P5;EEF1A1;EEF1A2	>sp|Q5VTE0|EF1A3_HUMAN Putative elongation factor 1-alpha-like 3 OS=Homo sapiens (Human) OX=9606 GN=EEF1A1P5 PE=5 SV=1;>sp|P68104|EF1A1_HUMAN Elongation factor 1-alpha 1 OS=Homo sapiens (Human) OX=9606 GN=EEF1A1 PE=1 SV=1;>sp|Q05639|EF1A2_HUMAN Elongation	1	69.3165	1.76659e-169	104.37	45.016	104.21	0	0		NaN	0	0		NaN	1	69.3165	2.11543e-169	104.21	0.999998	57.9951	1.76659e-169	104.37																		1	K	DKKAAGAGKVTKSAQKAQKAK__________	X;X;X;X;X;X;X;X;X;X;X;X;X;X;X;Lactyl (K);X;X;X;X;X;X;X;X;X;X;X;X;X;X;X
Q5VTE0;P68104;Q05639	453;453;453	Q5VTE0	Q5VTE0	Putative elongation factor 1-alpha-like 3;Elongation factor 1-alpha 1;Elongation factor 1-alpha 2	EEF1A1P5;EEF1A1;EEF1A2	>sp|Q5VTE0|EF1A3_HUMAN Putative elongation factor 1-alpha-like 3 OS=Homo sapiens (Human) OX=9606 GN=EEF1A1P5 PE=5 SV=1;>sp|P68104|EF1A1_HUMAN Elongation factor 1-alpha 1 OS=Homo sapiens (Human) OX=9606 GN=EEF1A1 PE=1 SV=1;>sp|Q05639|EF1A2_HUMAN Elongation	0.999999	58.632	3.92229e-15	77.282	39.637	72.789	0	0		NaN	0	0		NaN	0.999999	58.632	1.22453e-08	72.789	0.999999	58.5	3.92229e-15	77.282																		1	K	IKAVDKKAAGAGKVTKSAQKAQKAK______	X;X;X;X;X;X;X;X;X;X;X;X;X;X;X;Lactyl (K);X;X;X;Lactyl (K);X;X;X;X;X;X;X;X;X;X;X
P78347	353	P78347	P78347	General transcription factor II-I	GTF2I	>sp|P78347|GTF2I_HUMAN General transcription factor II-I OS=Homo sapiens (Human) OX=9606 GN=GTF2I PE=1 SV=2	1	51.7622	0.0118696	51.762	42.44	51.762					1	51.7622	0.0118696	51.762	0	0		NaN	0	0		NaN																		1	K	PANAGKRKVREFNFEKWNARITDLRKQVEEL	X;X;X;X;X;X;X;X;X;X;X;X;X;X;X;Lactyl (K);X;X;X;X;X;X;X;X;X;X;X;X;X;X;X
Q00839	215	Q00839	Q00839	Heterogeneous nuclear ribonucleoprotein U	HNRNPU	>sp|Q00839|HNRPU_HUMAN Heterogeneous nuclear ribonucleoprotein U OS=Homo sapiens (Human) OX=9606 GN=HNRNPU PE=1 SV=6	0.999997	54.685	9.48823e-20	54.964	44.194	54.964					0.999997	54.685	9.48823e-20	54.964					0.999939	42.1517	7.93787e-08	42.529																		1	K	PPGARQGQQQAGGKKKAEGGGGGGRPGAPAA	X;X;X;X;X;X;X;X;X;X;X;X;X;X;X;Lactyl (K);X;X;X;X;X;X;X;X;X;X;X;X;X;X;X
Q01105;P0DME0	189;199	Q01105	Q01105	Protein SET;Protein SETSIP	SET;SETSIP	>sp|Q01105|SET_HUMAN Protein SET OS=Homo sapiens (Human) OX=9606 GN=SET PE=1 SV=3;>sp|P0DME0|SETLP_HUMAN Protein SETSIP OS=Homo sapiens (Human) OX=9606 GN=SETSIP PE=1 SV=1	1	87.5679	5.13026e-131	97.813	83.134	87.568	1	53.5672	0.000609457	53.567	1	54.2593	0.00246412	54.259	1	97.8134	5.13026e-131	97.813	1	87.5679	1.80132e-61	87.568																		1	K	KSGKDLTKRSSQTQNKASRKRQHEEPESFFT	X;X;X;X;X;X;X;X;X;X;X;X;X;X;X;Lactyl (K);X;X;X;X;X;X;X;X;X;X;X;X;X;X;X
Q07666	432	Q07666	Q07666	KH domain-containing, RNA-binding, signal transduction-associated protein 1	KHDRBS1	>sp|Q07666|KHDR1_HUMAN KH domain-containing, RNA-binding, signal transduction-associated protein 1 OS=Homo sapiens (Human) OX=9606 GN=KHDRBS1 PE=1 SV=1	1	47.3018	9.53666e-05	47.302	25.752	47.302	0	0		NaN									1	47.3018	9.53666e-05	47.302																			K	NGTRPSLKAPPARPVKGAYREHPYGRY____	X;X;X;X;X;X;X;X;X;X;X;X;X;X;X;Lactyl (K);X;X;X;X;X;X;X;X;X;X;X;X;X;X;X
Q08945	540	Q08945	Q08945	FACT complex subunit SSRP1	SSRP1	>sp|Q08945|SSRP1_HUMAN FACT complex subunit SSRP1 OS=Homo sapiens (Human) OX=9606 GN=SSRP1 PE=1 SV=1	0.499885	0	0.0130152	45.022	29.878	45.022	0	0		NaN					0.499885	0	0.0130152	45.022																							K	MAKDRKSRKKPVEVKKGKDPNAPKRPMSAYM	X;X;X;X;X;X;X;X;X;X;X;X;X;X;X;Lactyl (K);X;X;X;X;X;X;X;X;X;X;X;X;X;X;X
Q08945	542	Q08945	Q08945	FACT complex subunit SSRP1	SSRP1	>sp|Q08945|SSRP1_HUMAN FACT complex subunit SSRP1 OS=Homo sapiens (Human) OX=9606 GN=SSRP1 PE=1 SV=1	0.499885	0	0.0130152	45.022	29.878	45.022	0	0		NaN					0.499885	0	0.0130152	45.022																							K	KDRKSRKKPVEVKKGKDPNAPKRPMSAYMLW	X;X;X;X;X;X;X;X;X;X;X;X;X;X;X;X;X;X;X;X;X;X;X;X;X;X;X;X;X;X;X
Q13148	84	Q13148	Q13148	TAR DNA-binding protein 43	TARDBP	>sp|Q13148|TADBP_HUMAN TAR DNA-binding protein 43 OS=Homo sapiens (Human) OX=9606 GN=TARDBP PE=1 SV=1	0.999999	60.1963	0.000494641	60.196	48.613	60.196	0	0		NaN	0	0		NaN	0	0		NaN	0.999999	60.1963	0.000494641	60.196																		1	K	GNLVYVVNYPKDNKRKMDETDASSAVKVKRA	X;X;X;X;X;X;X;X;X;X;X;X;X;X;X;Lactyl (K);X;X;X;X;X;X;X;X;X;X;X;X;X;X;X
Q13185	92	Q13185	Q13185	Chromobox protein homolog 3	CBX3	>sp|Q13185|CBX3_HUMAN Chromobox protein homolog 3 OS=Homo sapiens (Human) OX=9606 GN=CBX3 PE=1 SV=4	1	73.9271	7.68279e-23	73.927	63.283	73.927	0	0		NaN	0	0		NaN					1	73.9271	7.68279e-23	73.927																		1	K	LNSQKAGKEKDGTKRKSLSDSESDDSKSKKK	X;X;X;X;X;X;X;X;X;X;X;X;X;X;X;Lactyl (K);X;X;X;X;X;X;X;X;X;X;X;X;X;X;X
Q13185	20	Q13185	Q13185	Chromobox protein homolog 3	CBX3	>sp|Q13185|CBX3_HUMAN Chromobox protein homolog 3 OS=Homo sapiens (Human) OX=9606 GN=CBX3 PE=1 SV=4	0.954799	13.2478	6.83187e-11	58.246	46.663	58.246	0	0		NaN					0.954799	13.2478	6.83187e-11	58.246																						1	K	KTTLQKMGKKQNGKSKKVEEAEPEEFVVEKV	X;X;X;X;X;Lactyl (K);X;X;X;X;X;X;X;X;X;Lactyl (K);X;X;X;X;X;X;X;X;X;X;X;X;X;X;X
Q13185	10	Q13185	Q13185	Chromobox protein homolog 3	CBX3	>sp|Q13185|CBX3_HUMAN Chromobox protein homolog 3 OS=Homo sapiens (Human) OX=9606 GN=CBX3 PE=1 SV=4	0.995743	23.6902	3.99474e-33	82.671	53.522	82.671	0	0		NaN	0	0		NaN	0.995743	23.6902	3.99474e-33	82.671	0	0		NaN																		1	K	______MASNKTTLQKMGKKQNGKSKKVEEA	X;X;X;X;X;X;X;X;X;X;X;X;X;X;X;Lactyl (K);X;X;X;X;X;X;X;X;X;Lactyl (K);X;X;X;X;X
Q13435	877	Q13435	Q13435	Splicing factor 3B subunit 2	SF3B2	>sp|Q13435|SF3B2_HUMAN Splicing factor 3B subunit 2 OS=Homo sapiens (Human) OX=9606 GN=SF3B2 PE=1 SV=2	1	48.7942	0.0164184	48.794	31.282	48.794	1	47.6028	0.0164184	47.603	1	48.7942	0.0174885	48.794	0	0		NaN	1	48.7942	0.0174885	48.794																		1	K	DMVAEHAAKQKQKKRKAQPQDSRGGSKKYKE	X;X;X;X;X;X;X;X;X;X;X;X;X;X;X;Lactyl (K);X;X;X;X;X;X;X;X;X;X;X;X;X;X;X
Q14978	496	Q14978	Q14978	Nucleolar and coiled-body phosphoprotein 1	NOLC1	>sp|Q14978|NOLC1_HUMAN Nucleolar and coiled-body phosphoprotein 1 OS=Homo sapiens (Human) OX=9606 GN=NOLC1 PE=1 SV=2	0.602401	4.81891	2.08468e-15	47.088	29.972	43.696									0.577685	4.37188	2.08468e-15	47.088	0.602401	4.81891	7.31199e-10	43.696																		1	K	EEEKTSKSAVKKKPQKVAGGAAPSKPASAKK	X;X;X;X;X;X;X;X;X;X;X;X;X;X;X;Lactyl (K);X;X;X;X;X;X;X;X;X;X;X;X;X;X;X
Q14978	251	Q14978	Q14978	Nucleolar and coiled-body phosphoprotein 1	NOLC1	>sp|Q14978|NOLC1_HUMAN Nucleolar and coiled-body phosphoprotein 1 OS=Homo sapiens (Human) OX=9606 GN=NOLC1 PE=1 SV=2	0.99722	25.9156	0.00182515	49.06	16.59	49.06													0.99722	25.9156	0.00182515	49.06																		1	K	AATPKKTVPKKQVVAKAPVKAATTPTRKSSS	X;X;X;X;X;X;X;X;X;X;X;X;X;X;X;Lactyl (K);X;X;X;X;X;X;X;X;X;X;X;X;X;X;X
Q15233	467	Q15233	Q15233	Non-POU domain-containing octamer-binding protein	NONO	>sp|Q15233|NONO_HUMAN Non-POU domain-containing octamer-binding protein OS=Homo sapiens (Human) OX=9606 GN=NONO PE=1 SV=4	1	119.386	0	119.39	105.21	119.39									1	119.386	0	119.39	0	0		NaN																		1	K	PAFNRAAPGAEFAPNKRRRY___________	X;X;X;X;X;X;X;X;X;X;X;X;X;X;X;Lactyl (K);X;X;X;X;X;X;X;X;X;X;X;X;X;X;X
Q15691	174	Q15691	Q15691	Microtubule-associated protein RP/EB family member 1	MAPRE1	>sp|Q15691|MARE1_HUMAN Microtubule-associated protein RP/EB family member 1 OS=Homo sapiens (Human) OX=9606 GN=MAPRE1 PE=1 SV=3	1	41.2419	9.78365e-06	47.062	35.015	41.242	1	47.0619	9.78365e-06	47.062	0	0		NaN	1	41.2419	0.000460222	41.242	0	0		NaN																		1	K	APQRPISTQRTAAAPKAGPGVVRKNPGVGNG	X;X;X;X;X;X;X;X;X;X;X;X;X;X;X;Lactyl (K);X;X;X;X;X;X;X;X;X;X;X;X;X;X;X
Q4G0X9	881	Q4G0X9	Q4G0X9	Coiled-coil domain-containing protein 40	CCDC40	>sp|Q4G0X9|CCD40_HUMAN Coiled-coil domain-containing protein 40 OS=Homo sapiens (Human) OX=9606 GN=CCDC40 PE=1 SV=2	0.889906	9.0758	0.018897	54.157	25.008	54.157									0	0		NaN	0.889906	9.0758	0.018897	54.157	0	0		NaN	0	0		NaN					0	0		NaN		1	K	NEFVRSLKASERETIKMQDKLNQLSEEKATL	X;X;X;X;X;X;X;X;X;X;X;X;X;X;X;Lactyl (K);Oxidation (M);X;X;X;X;X;X;X;X;X;X;X;X;X;X
Q8WW12	82	Q8WW12	Q8WW12	PEST proteolytic signal-containing nuclear protein	PCNP	>sp|Q8WW12|PCNP_HUMAN PEST proteolytic signal-containing nuclear protein OS=Homo sapiens (Human) OX=9606 GN=PCNP PE=1 SV=2	1	72.607	3.96457e-19	74.173	33.291	72.607	1	74.1727	5.74403e-11	74.173	1	72.607	3.96457e-19	72.607	0.999975	46.0014	0.0252008	46.001	1	66.2987	2.78475e-07	66.299																		1	K	KISKFGFAIGSQTTKKASAISIKLGSSKPKE	X;X;X;X;X;X;X;X;X;X;X;X;X;X;X;Lactyl (K);X;X;X;X;X;X;X;X;X;X;X;X;X;X;X
Q8WXF1	14	Q8WXF1	Q8WXF1	Paraspeckle component 1	PSPC1	>sp|Q8WXF1|PSPC1_HUMAN Paraspeckle component 1 OS=Homo sapiens (Human) OX=9606 GN=PSPC1 PE=1 SV=1	1	40.2683	1.23738e-41	68.312	40.138	40.268									1	68.3122	1.23738e-41	68.312	1	40.2683	0.00110745	40.268																		1	K	__MMLRGNLKQVRIEKNPARLRALESAVGES	X;X;X;X;X;X;X;X;X;X;X;X;X;X;X;Lactyl (K);X;X;X;X;X;X;X;X;X;X;X;X;X;X;X
Q92841	109	Q92841	Q92841	Probable ATP-dependent RNA helicase DDX17	DDX17	>sp|Q92841|DDX17_HUMAN Probable ATP-dependent RNA helicase DDX17 OS=Homo sapiens (Human) OX=9606 GN=DDX17 PE=1 SV=2	1	61.9623	0.00761281	61.962	48.954	61.962	1	61.9623	0.00761281	61.962	1	61.9623	0.00761281	61.962					0	0		NaN																		1	K	RGGFGARGGGGLPPKKFGNPGERLRKKKWDL	X;X;X;X;X;X;X;X;X;X;X;X;X;X;X;Lactyl (K);X;X;X;X;X;X;X;X;X;X;X;X;X;X;X
Q92945	71	Q92945	Q92945	Far upstream element-binding protein 2	KHSRP	>sp|Q92945|FUBP2_HUMAN Far upstream element-binding protein 2 OS=Homo sapiens (Human) OX=9606 GN=KHSRP PE=1 SV=4	1	44.5427	0.00393654	44.543	30.385	44.543													1	44.5427	0.00393654	44.543																		1	K	GGPSQPPGGGGPGIRKDAFADAVQRARQIAA	X;X;X;X;X;X;X;X;X;X;X;X;X;X;X;Lactyl (K);X;X;X;X;X;X;X;X;X;X;X;X;X;X;X
Q96AT1	99	Q96AT1	Q96AT1	Uncharacterized protein KIAA1143	KIAA1143	>sp|Q96AT1|K1143_HUMAN Uncharacterized protein KIAA1143 OS=Homo sapiens (Human) OX=9606 GN=KIAA1143 PE=1 SV=2	0.814052	6.41276	0.00146283	51.276	27.923	51.276	0	0		NaN									0.814052	6.41276	0.00146283	51.276																		1	K	ADEEPTPADGRIIYRKPVKHPSDEKYSGLTA	X;X;X;X;X;X;X;X;X;X;X;X;X;X;X;Lactyl (K);X;X;X;X;X;X;X;X;X;X;X;X;X;X;X
Q96I25	41	Q96I25	Q96I25	Splicing factor 45	RBM17	>sp|Q96I25|SPF45_HUMAN Splicing factor 45 OS=Homo sapiens (Human) OX=9606 GN=RBM17 PE=1 SV=1	1	40.4964	0.0208151	42.21	31.98	40.496					1	42.2105	0.0224895	42.21	0	0		NaN	1	40.4964	0.0208151	40.496																			K	LQSQLQVKKAALTQAKSQRTKQSTVLAPVID	X;X;X;X;X;X;X;X;X;X;X;X;X;X;X;Lactyl (K);X;X;X;X;X;X;X;X;X;X;X;X;X;X;X
Q96I25	245	Q96I25	Q96I25	Splicing factor 45	RBM17	>sp|Q96I25|SPF45_HUMAN Splicing factor 45 OS=Homo sapiens (Human) OX=9606 GN=RBM17 PE=1 SV=1	1	45.0814	6.94609e-06	55.676	35.156	45.081					1	55.6761	6.94609e-06	55.676					1	45.0814	0.00278667	45.081																		1	K	FLANMGGTVAHKIMQKYGFREGQGLGKHEQG	X;X;X;X;X;X;X;X;X;X;X;X;X;X;X;Lactyl (K);X;X;X;X;X;X;X;X;X;X;X;X;X;X;X
Q96I25	24	Q96I25	Q96I25	Splicing factor 45	RBM17	>sp|Q96I25|SPF45_HUMAN Splicing factor 45 OS=Homo sapiens (Human) OX=9606 GN=RBM17 PE=1 SV=1	0.999931	41.5959	0.00156423	42.843	25.631	42.843	0.999931	41.5959	0.00156423	42.843	0	0		NaN	0	0		NaN	0	0		NaN																		1	K	VETSDSKTEGWSKNFKLLQSQLQVKKAALTQ	X;X;X;X;X;X;X;X;X;X;X;X;X;X;X;Lactyl (K);X;X;X;X;X;X;X;X;X;X;X;X;X;X;X
Q9H1E3	186	Q9H1E3	Q9H1E3	Nuclear ubiquitous casein and cyclin-dependent kinase substrate 1	NUCKS1	>sp|Q9H1E3|NUCKS_HUMAN Nuclear ubiquitous casein and cyclin-dependent kinase substrate 1 OS=Homo sapiens (Human) OX=9606 GN=NUCKS1 PE=1 SV=1	0.558553	1.02185	0.000560242	54.259	34.473	54.259	0	0		NaN	0	0		NaN	0.558553	1.02185	0.000560242	54.259	0	0		NaN																		1	K	KPRLKATVTPSPVKGKGKVGRPTASKASKEK	X;X;X;X;Lactyl (K);X;X;X;X;X;X;X;X;X;X;Lactyl (K);X;Lactyl (K);X;X;X;X;X;X;X;Lactyl (K);X;X;X;X;X
Q9H1E3	35	Q9H1E3	Q9H1E3	Nuclear ubiquitous casein and cyclin-dependent kinase substrate 1	NUCKS1	>sp|Q9H1E3|NUCKS_HUMAN Nuclear ubiquitous casein and cyclin-dependent kinase substrate 1 OS=Homo sapiens (Human) OX=9606 GN=NUCKS1 PE=1 SV=1	0.506844	0.118901	0.000581131	68.016	51.476	68.016													0.506844	0.118901	0.000581131	68.016																		1	K	DDADEDYGRDSGPPTKKIRSSPREAKNKRRS	X;X;X;X;X;X;X;X;X;X;X;X;X;X;X;Lactyl (K);X;X;X;X;X;X;X;X;X;X;X;X;X;X;X
Q9H1E3	36	Q9H1E3	Q9H1E3	Nuclear ubiquitous casein and cyclin-dependent kinase substrate 1	NUCKS1	>sp|Q9H1E3|NUCKS_HUMAN Nuclear ubiquitous casein and cyclin-dependent kinase substrate 1 OS=Homo sapiens (Human) OX=9606 GN=NUCKS1 PE=1 SV=1	0.576054	1.33152	0.0107158	57.59	47.511	57.59									0.576054	1.33152	0.0107158	57.59																						1	K	DADEDYGRDSGPPTKKIRSSPREAKNKRRSG	X;X;X;X;X;X;X;X;X;X;X;X;X;X;X;Lactyl (K);X;X;X;X;X;X;X;X;X;X;X;X;X;X;X
Q9H1E3	188	Q9H1E3	Q9H1E3	Nuclear ubiquitous casein and cyclin-dependent kinase substrate 1	NUCKS1	>sp|Q9H1E3|NUCKS_HUMAN Nuclear ubiquitous casein and cyclin-dependent kinase substrate 1 OS=Homo sapiens (Human) OX=9606 GN=NUCKS1 PE=1 SV=1	0.999997	55.3526	0.000167454	55.353	31.323	55.353									0	0		NaN	0.999997	55.3526	0.000167454	55.353																		1	K	RLKATVTPSPVKGKGKVGRPTASKASKEKTP	X;X;Lactyl (K);X;X;X;X;X;X;X;X;X;X;Lactyl (K);X;Lactyl (K);X;X;X;X;X;X;X;Lactyl (K);X;X;X;X;X;X;X
Q9H1E3	196	Q9H1E3	Q9H1E3	Nuclear ubiquitous casein and cyclin-dependent kinase substrate 1	NUCKS1	>sp|Q9H1E3|NUCKS_HUMAN Nuclear ubiquitous casein and cyclin-dependent kinase substrate 1 OS=Homo sapiens (Human) OX=9606 GN=NUCKS1 PE=1 SV=1	0.999971	45.4316	2.95382e-37	78.705	51	78.705	0.999971	45.4316	2.95382e-37	78.705	0.999687	35.0368	0.000299646	49.28	0.994528	22.5944	0.00043902	46.063	0.99989	39.5883	0.00138302	49.777																		1	K	SPVKGKGKVGRPTASKASKEKTPSPKEEDEE	X;X;X;X;X;Lactyl (K);X;X;X;X;X;X;X;X;X;Lactyl (K);X;X;X;X;X;X;X;X;X;X;X;X;X;X;X
Q9H1E3	9	Q9H1E3	Q9H1E3	Nuclear ubiquitous casein and cyclin-dependent kinase substrate 1	NUCKS1	>sp|Q9H1E3|NUCKS_HUMAN Nuclear ubiquitous casein and cyclin-dependent kinase substrate 1 OS=Homo sapiens (Human) OX=9606 GN=NUCKS1 PE=1 SV=1	1	83.4231	1.27655e-75	83.423	82.459	83.423	0	0		NaN	1	43.1637	1.90669e-10	43.164	1	78.7079	6.26698e-60	78.708	1	83.4231	1.27655e-75	83.423																		1	K	_______MSRPVRNRKVVDYSQFQESDDADE	X;X;X;X;X;X;X;X;X;X;X;X;X;X;X;Lactyl (K);X;X;X;X;X;X;X;X;X;X;X;X;X;X;X
Q9H1E3	175	Q9H1E3	Q9H1E3	Nuclear ubiquitous casein and cyclin-dependent kinase substrate 1	NUCKS1	>sp|Q9H1E3|NUCKS_HUMAN Nuclear ubiquitous casein and cyclin-dependent kinase substrate 1 OS=Homo sapiens (Human) OX=9606 GN=NUCKS1 PE=1 SV=1	1	69.804	3.80561e-12	71.176	52.081	71.176	0.999997	55.7924	0.00511161	57.164	0.999954	43.336	0.0075308	44.847	1	69.804	3.80561e-12	71.176	0.999997	54.8332	0.000357371	56.205																		1	K	SKPERKEKKMPKPRLKATVTPSPVKGKGKVG	X;X;X;X;X;X;X;X;X;X;X;X;X;X;X;Lactyl (K);X;X;X;X;X;X;X;X;X;X;Lactyl (K);X;Lactyl (K);X;X
Q9H1E3	98	Q9H1E3	Q9H1E3	Nuclear ubiquitous casein and cyclin-dependent kinase substrate 1	NUCKS1	>sp|Q9H1E3|NUCKS_HUMAN Nuclear ubiquitous casein and cyclin-dependent kinase substrate 1 OS=Homo sapiens (Human) OX=9606 GN=NUCKS1 PE=1 SV=1	0.999816	37.353	2.23417e-05	68.847	38.235	68.847	0	0		NaN	0.999565	33.6102	0.0249081	53.751	0.999687	35.041	0.011716	60.167	0.999816	37.353	2.23417e-05	68.847																		1	K	KEDHKNVRQQRQAASKAASKQREMLMEDVGS	X;X;X;X;X;X;X;X;X;X;X;X;X;X;X;Lactyl (K);X;X;X;X;X;X;X;X;X;X;X;X;X;X;X
Q9H444	6	Q9H444	Q9H444	Charged multivesicular body protein 4b	CHMP4B	>sp|Q9H444|CHM4B_HUMAN Charged multivesicular body protein 4b OS=Homo sapiens (Human) OX=9606 GN=CHMP4B PE=1 SV=1	0.999825	37.5693	1.08658e-07	54.343	47.656	54.343													0.999825	37.5693	1.08658e-07	54.343																		1	K	__________MSVFGKLFGAGGGKAGKGGPT	X;X;X;X;X;X;X;X;X;X;X;X;X;X;X;Lactyl (K);X;X;X;X;X;X;X;X;X;X;X;X;X;X;X
Q9HB71	212	Q9HB71	Q9HB71	Calcyclin-binding protein	CACYBP	>sp|Q9HB71|CYBP_HUMAN Calcyclin-binding protein OS=Homo sapiens (Human) OX=9606 GN=CACYBP PE=1 SV=2	1	47.3018	0.00974291	47.302	33.493	47.302	1	47.3018	0.00974291	47.302					0	0		NaN																						1	K	KIYEDGDDDMKRTINKAWVESREKQAKGDTE	X;X;X;X;X;X;X;X;X;X;X;X;X;X;X;Lactyl (K);X;X;X;X;X;X;X;X;X;X;X;X;X;X;X
Q9NR30	97	Q9NR30	Q9NR30	Nucleolar RNA helicase 2	DDX21	>sp|Q9NR30|DDX21_HUMAN Nucleolar RNA helicase 2 OS=Homo sapiens (Human) OX=9606 GN=DDX21 PE=1 SV=5	0.491857	0	0.0133739	45.368	22.727	45.368	0	0		NaN					0	0		NaN	0.491857	0	0.0133739	45.368																			K	EPSQNDISPKTKSLRKKKEPIEKKVVSSKTK	X;X;X;X;X;X;X;X;X;X;X;X;X;X;X;Lactyl (K);X;X;X;X;X;X;X;X;X;X;X;X;X;X;X
Q9NR30	98	Q9NR30	Q9NR30	Nucleolar RNA helicase 2	DDX21	>sp|Q9NR30|DDX21_HUMAN Nucleolar RNA helicase 2 OS=Homo sapiens (Human) OX=9606 GN=DDX21 PE=1 SV=5	0.491857	0	0.0133739	45.368	22.727	45.368	0	0		NaN					0	0		NaN	0.491857	0	0.0133739	45.368																			K	PSQNDISPKTKSLRKKKEPIEKKVVSSKTKK	X;X;X;X;X;X;X;X;X;X;X;X;X;X;X;X;X;X;X;X;X;X;X;X;X;X;X;X;X;X;X
Q9UHX1	454	Q9UHX1	Q9UHX1	Poly(U)-binding-splicing factor PUF60	PUF60	>sp|Q9UHX1|PUF60_HUMAN Poly(U)-binding-splicing factor PUF60 OS=Homo sapiens (Human) OX=9606 GN=PUF60 PE=1 SV=1	1	41.4482	0.0134816	41.448	34.994	41.448					1	41.4482	0.0134816	41.448	0	0		NaN	0	0		NaN																			K	HMSISGSSARHMVMQKLLRKQESTVMVLRNM	X;X;X;X;X;X;X;X;X;X;X;X;X;X;X;Lactyl (K);X;X;X;X;X;X;X;X;X;X;X;X;X;X;X
Q9Y2W1	527	Q9Y2W1	Q9Y2W1	Thyroid hormone receptor-associated protein 3	THRAP3	>sp|Q9Y2W1|TR150_HUMAN Thyroid hormone receptor-associated protein 3 OS=Homo sapiens (Human) OX=9606 GN=THRAP3 PE=1 SV=2	0.999991	50.3592	0.00044788	64.82	41.144	64.82					0	0		NaN	0	0		NaN	0.999991	50.3592	0.00044788	64.82																		1	K	HRGFVPEKNFRVTAYKAVQEKSSSPPPRKTS	X;X;X;X;X;X;X;X;X;X;X;X;X;X;X;Lactyl (K);X;X;X;X;X;X;X;X;X;X;X;X;X;X;X
Q9Y5B9	1021	Q9Y5B9	Q9Y5B9	FACT complex subunit SPT16	SUPT16H	>sp|Q9Y5B9|SP16H_HUMAN FACT complex subunit SPT16 OS=Homo sapiens (Human) OX=9606 GN=SUPT16H PE=1 SV=1	1	47.1869	0.00197861	47.187	39.62	47.187					0	0		NaN					1	47.1869	0.00197861	47.187																		1	K	YEEEEEQSRSMSRKRKASVHSSGRGSNRGSR	X;X;X;X;X;X;X;X;X;X;X;X;X;X;X;Lactyl (K);X;X;X;X;X;X;X;X;X;X;X;X;X;X;X
[truncated: 81 more columns]

## Sheet: Table S5
Table S5. PTM enrichment analysis of lactylated proteins.
Category	Term	Count	%	PValue	Genes	List Total	Pop Hits	Pop Total	Fold Enrichment
UP_KW_PTM	KW-0007~Acetylation	55	88.7097	8.31312e-27	FEN1, HNRNPU, HMGB1, H2AC15, H2BC21, KHSRP, ENSA, H4C1, H3-3A, GTF2I, HMGN1, DDX17, RBM17, SUPT16H, PARP1, UBE2E1, KIAA1143, EDF1, CACYBP, H2BC13, PSPC1, THRAP3, SUB1, NCL, CHMP4B, MATR3, SNRPA1, DNAJC8, MAPRE1, KHDRBS1, SF3B2, DDX5, SET, EEF1A1P5, NOLC1, DDX21, HTATSF1, PCNP, PUF60, HNRNPA1, H2BC9, H2AZ2, NPM1, SSB, H2BC5, CBX3, NONO, RPA1, SSRP1, U2SURP, HNRNPK, HNRNPF, PDCD4, HNRNPC, C11ORF58	61	3455	14062	3.66971
UP_KW_PTM	KW-1017~Isopeptide bond	41	66.129	3.35537e-22	PHF3, KHDRBS1, SF3B2, DDX5, SET, NOLC1, DDX21, HNRNPU, HMGB1, HTATSF1, H2AC15, PUF60, H2BC21, KHSRP, H4C1, HNRNPA1, GTF2I, H2BC9, DDX17, RBM17, NPM1, SUPT16H, H2BC5, PARP1, CBX3, NONO, UBE2E1, RPA1, SSRP1, U2SURP, H2BC13, HNRNPK, THRAP3, NCL, SUB1, HNRNPF, SNRPA1, MATR3, HNRNPC, TARDBP, C11ORF58	61	1794	14062	5.2684
UP_KW_PTM	KW-0832~Ubl conjugation	45	72.5806	1.02726e-20	PHF3, KHDRBS1, SF3B2, DDX5, SET, NOLC1, DDX21, HNRNPU, HTATSF1, H2AC15, PCNP, PUF60, H2BC21, KHSRP, H4C1, HNRNPA1, H3-3A, GTF2I, H2BC9, DDX17, H2AZ2, RBM17, NPM1, SUPT16H, H2BC5, PARP1, CBX3, NONO, UBE2E1, RPA1, SSRP1, U2SURP, H2BC13, HNRNPK, THRAP3, NCL, SUB1, HNRNPF, PDCD4, CHMP4B, SNRPA1, MATR3, HNRNPC, TARDBP, C11ORF58	61	2545	14062	4.07607
UP_KW_PTM	KW-0488~Methylation	25	40.3226	1.4234e-12	PHF3, KHDRBS1, SF3B2, FEN1, SET, EEF1A1P5, NOLC1, HNRNPU, H2AC15, H2BC21, KHSRP, H4C1, HNRNPA1, H3-3A, H2BC9, DDX17, H2BC5, NONO, EDF1, H2BC13, HNRNPK, PSPC1, THRAP3, NCL, TARDBP	61	1037	14062	5.55749
UP_KW_PTM	KW-0013~ADP-ribosylation	11	17.7419	6.23087e-11	H2BC13, NPM1, SUPT16H, H2BC5, PARP1, THRAP3, TMA7, HNRNPU, HMGB1, H3-3A, HMGN1	61	118	14062	21.4896
UP_KW_PTM	KW-0597~Phosphoprotein	58	93.5484	2.17678e-10	PHF3, FEN1, HNRNPU, NUCKS1, HMGB1, H2AC15, SRP14, H2BC21, KHSRP, ENSA, H4C1, H3-3A, GTF2I, HMGN1, DDX17, RBM17, SUPT16H, PARP1, KIAA1143, EDF1, CACYBP, H2BC13, PSPC1, THRAP3, SUB1, NCL, CHMP4B, MATR3, SNRPA1, DNAJC8, MAPRE1, CCDC40, KHDRBS1, SF3B2, DDX5, SET, EEF1A1P5, NOLC1, DDX21, HTATSF1, PCNP, PUF60, HNRNPA1, H2BC9, NPM1, SSB, H2BC5, CBX3, NONO, RPA1, SSRP1, U2SURP, HNRNPK, HNRNPF, PDCD4, HNR…	61	8305	14062	1.60992
UP_KW_PTM	KW-0379~Hydroxylation	7	11.2903	0.000132736	H2BC9, H2BC13, H2BC5, H2BC21, H4C1, H2AC15, H3-3A	61	185	14062	8.72255
UP_KW_PTM	KW-0164~Citrullination	4	6.45161	0.00915238	HNRNPU, H4C1, H2AC15, H3-3A	61	101	14062	9.12969

## Sheet: Table S6
Table S6. PANTHER protein class enrichment analysis of lactylated proteins.
Analysis Type:	PANTHER Overrepresentation Test (Released 20210224)
Annotation Version and Release Date:	PANTHER version 16.0 Released 2020-12-01
Analyzed List:	upload_1 (Homo sapiens)
Reference List:	Homo sapiens (all genes in database)
Test Type:	FISHER
Correction:	FDR
PANTHER Protein Class	Homo sapiens - REFLIST (20595)	upload_1 (62)	upload_1 (expected)	upload_1 (over/under)	upload_1 (fold Enrichment)	upload_1 (raw P-value)	upload_1 (FDR)
nucleic acid metabolism protein (PC00171)	914	22	2.75	+	8	1.31e-14	2.53e-12
RNA metabolism protein (PC00031)	685	18	2.06	+	8.73	1.38e-12	1.33e-10
histone (PC00118)	64	8	0.19	+	41.52	4.25e-11	2.73e-09
chromatin/chromatin-binding, or -regulatory protein (PC00077)	284	11	0.85	+	12.87	1.11e-09	5.37e-08
RNA splicing factor (PC00148)	139	8	0.42	+	19.12	1.33e-08	5.12e-07
RNA processing factor (PC00147)	236	9	0.71	+	12.67	4.71e-08	1.51e-06

## Sheet: Table S7
Table S7. GO enrichment analysis of lactylated proteins.
Category	Term	Count	%	PValue	Genes	List Total	Pop Hits	Pop Total	Fold Enrichment
GOTERM_CC_DIRECT	GO:0005654~nucleoplasm	48	77.4194	2.74336e-24	KHDRBS1, SF3B2, DDX5, FEN1, SET, NOLC1, DDX21, HNRNPU, NUCKS1, HMGB1, HTATSF1, PCNP, PUF60, H2BC21, KHSRP, ENSA, H4C1, HNRNPA1, H3-3A, HMGN1, GTF2I, H2BC9, DDX17, RBM17, NPM1, SUPT16H, H2BC5, PARP1, CBX3, NONO, UBE2E1, RPA1, EDF1, CACYBP, SSRP1, U2SURP, H2BC13, HNRNPK, PSPC1, THRAP3, NCL, SUB1, HNRNPF, SNRPA1, SNRPE, DNAJC8, HNRNPC, TARDBP	59	3846	20164	4.26537
GOTERM_CC_DIRECT	GO:0005634~nucleus	53	85.4839	4.98279e-22	PHF3, FEN1, HNRNPU, NUCKS1, HMGB1, H2AC15, SRP14, H2BC21, KHSRP, H4C1, H3-3A, GTF2I, HMGN1, DDX17, SUPT16H, PARP1, UBE2E1, EDF1, CACYBP, H2BC13, PSPC1, THRAP3, SUB1, NCL, CHMP4B, MATR3, SNRPA1, SNRPE, DNAJC8, KHDRBS1, SF3B2, DDX5, SET, EEF1A1P5, HTATSF1, PCNP, PUF60, HNRNPA1, H2BC9, H2AZ2, NPM1, SSB, H2BC5, CBX3, NONO, RPA1, SSRP1, U2SURP, HNRNPK, HNRNPF, PDCD4, HNRNPC, TARDBP	59	5848	20164	3.09737
GOTERM_CC_DIRECT	GO:0071013~catalytic step 2 spliceosome	9	14.5161	1.26483e-10	SF3B2, DDX5, HNRNPK, HNRNPF, HNRNPU, SNRPA1, SNRPE, HNRNPC, HNRNPA1	59	86	20164	35.7659
GOTERM_CC_DIRECT	GO:0005681~spliceosomal complex	9	14.5161	9.26169e-10	RBM17, SF3B2, DDX5, HNRNPK, NCL, SNRPA1, SNRPE, HNRNPC, HNRNPA1	59	110	20164	27.9624
GOTERM_CC_DIRECT	GO:1990904~ribonucleoprotein complex	9	14.5161	1.9889e-08	DDX17, NPM1, DDX5, SSB, HNRNPK, HNRNPF, NCL, HNRNPU, HNRNPA1	59	162	20164	18.9868
GOTERM_CC_DIRECT	GO:0000786~nucleosome	8	12.9032	1.10854e-07	H2BC9, H2BC13, H2AZ2, H2BC5, H2BC21, H4C1, H2AC15, H3-3A	59	134	20164	20.4037
GOTERM_CC_DIRECT	GO:0005686~U2 snRNP	5	8.06452	8.78682e-07	SF3B2, SNRPA1, SNRPE, HTATSF1, U2SURP	59	26	20164	65.7236
GOTERM_CC_DIRECT	GO:0000781~chromosome, telomeric region	7	11.2903	9.57093e-06	FEN1, SSB, PARP1, CBX3, RPA1, H4C1, H3-3A	59	171	20164	13.9903
GOTERM_CC_DIRECT	GO:0070062~extracellular exosome	18	29.0323	0.000111961	H2BC9, H2AZ2, DDX5, EEF1A1P5, H2BC5, CACYBP, H2AC15, H2BC13, HNRNPK, THRAP3, SUB1, NCL, H2BC21, CHMP4B, H4C1, HNRNPC, HNRNPA1, H3-3A	59	2217	20164	2.7748
GOTERM_CC_DIRECT	GO:0032991~macromolecular complex	10	16.129	0.000148193	H2BC9, KHDRBS1, NPM1, FEN1, SET, PARP1, HNRNPU, H4C1, HNRNPC, H3-3A	59	692	20164	4.93877
GOTERM_CC_DIRECT	GO:0016607~nuclear speck	8	12.9032	0.000186351	DDX17, SF3B2, PSPC1, THRAP3, NONO, HNRNPU, SNRPA1, TARDBP	59	417	20164	6.5566
GOTERM_CC_DIRECT	GO:0016020~membrane	18	29.0323	0.000503056	DDX17, KHDRBS1, NPM1, DDX5, FEN1, PARP1, NONO, DDX21, HNRNPU, HNRNPK, HNRNPF, NCL, KHSRP, MATR3, H4C1, HNRNPC, HNRNPA1, GTF2I	59	2511	20164	2.44991
GOTERM_CC_DIRECT	GO:0005694~chromosome	6	9.67742	0.000616325	PARP1, NCL, NONO, DDX21, HMGB1, SSRP1	59	239	20164	8.57982
GOTERM_MF_DIRECT	GO:0003723~RNA binding	37	59.6774	6.92151e-26	KHDRBS1, SF3B2, DDX5, NOLC1, DDX21, HNRNPU, NUCKS1, HMGB1, SRP14, HTATSF1, PUF60, KHSRP, H4C1, HNRNPA1, DDX17, RBM17, NPM1, SUPT16H, SSB, PARP1, NONO, EDF1, SSRP1, U2SURP, HNRNPK, PSPC1, THRAP3, NCL, SUB1, HNRNPF, PDCD4, SNRPA1, SNRPE, MATR3, HNRNPC, MAPRE1, TARDBP	59	1455	18770	8.09005
GOTERM_MF_DIRECT	GO:0003677~DNA binding	25	40.3226	8.97555e-14	KHDRBS1, FEN1, SET, HNRNPU, HMGB1, H2AC15, PUF60, H2BC21, KHSRP, H4C1, H3-3A, HMGN1, GTF2I, H2BC9, H2AZ2, H2BC5, PARP1, NONO, RPA1, EDF1, SSRP1, H2BC13, HNRNPK, THRAP3, NCL	59	1267	18770	6.27734
GOTERM_MF_DIRECT	GO:0003676~nucleic acid binding	9	14.5161	4.96067e-06	DDX17, RBM17, NPM1, DDX5, PSPC1, HNRNPF, NONO, KHSRP, MATR3	59	312	18770	9.17699
GOTERM_MF_DIRECT	GO:0046982~protein heterodimerization activity	9	14.5161	1.71422e-05	H2BC9, H2BC13, H2AZ2, H2BC5, H2BC21, NOLC1, H4C1, H2AC15, H3-3A	59	370	18770	7.73843
GOTERM_MF_DIRECT	GO:0003697~single-stranded DNA binding	6	9.67742	2.46259e-05	SUB1, RPA1, HNRNPU, NUCKS1, HMGB1, HNRNPA1	59	112	18770	17.043
GOTERM_MF_DIRECT	GO:0003690~double-stranded DNA binding	6	9.67742	2.79749e-05	FEN1, SUB1, HNRNPU, NUCKS1, HMGB1, TARDBP	59	115	18770	16.5984
GOTERM_MF_DIRECT	GO:0005515~protein binding	53	85.4839	4.90536e-05	FEN1, HNRNPU, HMGB1, H2AC15, SRP14, H2BC21, KHSRP, ENSA, H4C1, H3-3A, GTF2I, DDX17, RBM17, SUPT16H, PARP1, UBE2E1, KIAA1143, EDF1, CACYBP, H2BC13, PSPC1, THRAP3, SUB1, NCL, CHMP4B, MATR3, SNRPA1, SNRPE, DNAJC8, MAPRE1, KHDRBS1, SF3B2, DDX5, SET, NOLC1, DDX21, PCNP, PUF60, HNRNPA1, H2BC9, NPM1, SSB, H2BC5, CBX3, NONO, RPA1, SSRP1, U2SURP, HNRNPK, HNRNPF, PDCD4, HNRNPC, TARDBP	59	12518	18770	1.34696
GOTERM_MF_DIRECT	GO:0003713~transcription coactivator activity	7	11.2903	0.000124511	DDX17, NPM1, THRAP3, SUB1, EDF1, NUCKS1, HMGB1	59	252	18770	8.8371
GOTERM_MF_DIRECT	GO:0042802~identical protein binding	16	25.8065	0.000153195	KHDRBS1, PARP1, CBX3, NONO, DDX21, HNRNPU, HNRNPK, PUF60, SUB1, NCL, CHMP4B, MATR3, HNRNPC, MAPRE1, HNRNPA1, TARDBP	59	1704	18770	2.98719
GOTERM_MF_DIRECT	GO:0019904~protein domain specific binding	7	11.2903	0.000160416	KHDRBS1, HNRNPK, CBX3, NOLC1, CACYBP, H4C1, HNRNPA1	59	264	18770	8.43541
GOTERM_MF_DIRECT	GO:0003727~single-stranded RNA binding	4	6.45161	0.000495015	HNRNPF, HNRNPU, HMGB1, HNRNPA1	59	50	18770	25.4508
GOTERM_MF_DIRECT	GO:0003682~chromatin binding	8	12.9032	0.000518325	NPM1, SET, CBX3, NONO, HNRNPU, NUCKS1, SSRP1, HMGN1	59	460	18770	5.53279
GOTERM_MF_DIRECT	GO:0036002~pre-mRNA binding	3	4.83871	0.000960194	DDX5, HNRNPU, HNRNPA1	59	15	18770	63.6271
GOTERM_BP_DIRECT	GO:0000398~mRNA splicing, via spliceosome	16	25.8065	1.34895e-15	RBM17, SF3B2, DDX5, NONO, HNRNPU, HTATSF1, U2SURP, HNRNPK, PUF60, PSPC1, HNRNPF, SNRPA1, SNRPE, DNAJC8, HNRNPC, HNRNPA1	60	261	19349	19.7691
GOTERM_BP_DIRECT	GO:0000381~regulation of alternative mRNA splicing, via spliceosome	8	12.9032	8.22021e-10	DDX17, KHDRBS1, RBM17, DDX5, PUF60, THRAP3, HNRNPU, HNRNPA1	60	63	19349	40.9503
GOTERM_BP_DIRECT	GO:0006334~nucleosome assembly	8	12.9032	8.18256e-08	H2BC9, H2BC13, NPM1, SET, H2BC5, H2BC21, H4C1, H3-3A	60	121	19349	21.3212
GOTERM_BP_DIRECT	GO:0008380~RNA splicing	9	14.5161	1.12251e-07	SF3B2, PUF60, THRAP3, NONO, KHSRP, SNRPA1, HNRNPC, HNRNPA1, TARDBP	60	191	19349	15.1955
GOTERM_BP_DIRECT	GO:0006281~DNA repair	9	14.5161	1.87942e-06	RBM17, NPM1, FEN1, SUPT16H, PARP1, NONO, RPA1, HMGB1, SSRP1	60	277	19349	10.4778
GOTERM_BP_DIRECT	GO:0006397~mRNA processing	8	12.9032	3.08574e-06	KHDRBS1, SF3B2, PUF60, THRAP3, NONO, KHSRP, HNRNPA1, TARDBP	60	207	19349	12.4631
GOTERM_BP_DIRECT	GO:0048511~rhythmic process	6	9.67742	3.94796e-06	DDX5, PSPC1, CBX3, THRAP3, NONO, TARDBP	60	78	19349	24.8064
GOTERM_BP_DIRECT	GO:0016070~RNA metabolic process	5	8.06452	1.26089e-05	HNRNPK, HNRNPF, HNRNPU, HNRNPC, HNRNPA1	60	47	19349	34.3067
GOTERM_BP_DIRECT	GO:0000380~alternative mRNA splicing, via spliceosome	4	6.45161	4.56674e-05	DDX17, RBM17, DDX5, PUF60	60	23	19349	56.0841
GOTERM_BP_DIRECT	GO:0002218~activation of innate immune response	4	6.45161	0.000113916	PSPC1, NONO, MATR3, HMGB1	60	31	19349	41.6108
GOTERM_BP_DIRECT	GO:0016032~viral process	8	12.9032	0.000575032	SF3B2, NPM1, SUPT16H, SET, HNRNPU, HMGB1, SSRP1, HNRNPA1	60	474	19349	5.44276

## Sheet: Table S8
Table S8. KEGG and REACTOME pathway enrichment analysis of lactylated proteins.
Category	Term	Count	%	PValue	Genes	List Total	Pop Hits	Pop Total	Fold Enrichment
KEGG_PATHWAY	hsa03040:Spliceosome	11	17.7419	1.64992e-10	RBM17, SF3B2, DDX5, HNRNPK, PUF60, HNRNPU, SNRPA1, SNRPE, HNRNPC, HNRNPA1, U2SURP	34	147	8195	18.0362
KEGG_PATHWAY	hsa05322:Systemic lupus erythematosus	9	14.5161	4.58143e-08	H2BC9, H2BC13, H2AZ2, SSB, H2BC5, H2BC21, H4C1, H2AC15, H3-3A	34	136	8195	15.9505
KEGG_PATHWAY	hsa04613:Neutrophil extracellular trap formation	9	14.5161	6.08808e-07	H2BC9, H2BC13, H2AZ2, H2BC5, H2BC21, H4C1, HMGB1, H2AC15, H3-3A	34	190	8195	11.4172
KEGG_PATHWAY	hsa05034:Alcoholism	8	12.9032	7.4426e-06	H2BC9, H2BC13, H2AZ2, H2BC5, H2BC21, H4C1, H2AC15, H3-3A	34	187	8195	10.3114
KEGG_PATHWAY	hsa05203:Viral carcinogenesis	6	9.67742	0.00122415	H2BC9, H2BC13, HNRNPK, H2BC5, H2BC21, H4C1	34	204	8195	7.0891
KEGG_PATHWAY	hsa04217:Necroptosis	5	8.06452	0.00360194	H2AZ2, PARP1, CHMP4B, HMGB1, H2AC15	34	159	8195	7.57954
KEGG_PATHWAY	hsa03410:Base excision repair	3	4.83871	0.00768008	FEN1, PARP1, HMGB1	34	33	8195	21.9118
REACTOME_PATHWAY	R-HSA-72163~mRNA Splicing - Major Pathway	13	20.9677	5.02806e-12	RBM17, SF3B2, DDX5, HNRNPU, U2SURP, HNRNPK, PUF60, HNRNPF, SNRPA1, SNRPE, DNAJC8, HNRNPC, HNRNPA1	44	183	10538	17.0137
REACTOME_PATHWAY	R-HSA-72172~mRNA Splicing	13	20.9677	8.34929e-12	RBM17, SF3B2, DDX5, HNRNPU, U2SURP, HNRNPK, PUF60, HNRNPF, SNRPA1, SNRPE, DNAJC8, HNRNPC, HNRNPA1	44	191	10538	16.301
REACTOME_PATHWAY	R-HSA-72203~Processing of Capped Intron-Containing Pre-mRNA	13	20.9677	1.47284e-10	RBM17, SF3B2, DDX5, HNRNPU, U2SURP, HNRNPK, PUF60, HNRNPF, SNRPA1, SNRPE, DNAJC8, HNRNPC, HNRNPA1	44	244	10538	12.7602
REACTOME_PATHWAY	R-HSA-73884~Base Excision Repair	9	14.5161	2.79709e-09	H2BC9, H2BC13, H2AZ2, FEN1, H2BC5, PARP1, H2BC21, RPA1, H4C1	44	92	10538	23.4293
REACTOME_PATHWAY	R-HSA-8953854~Metabolism of RNA	17	27.4194	3.35514e-09	RBM17, SF3B2, DDX5, SET, DDX21, HNRNPU, U2SURP, HNRNPK, PUF60, HNRNPF, NCL, KHSRP, SNRPA1, SNRPE, DNAJC8, HNRNPC, HNRNPA1	44	673	10538	6.04978
REACTOME_PATHWAY	R-HSA-73886~Chromosome Maintenance	10	16.129	4.07572e-09	H2BC9, H2BC13, H2AZ2, NPM1, FEN1, H2BC5, H2BC21, RPA1, H4C1, H3-3A	44	141	10538	16.9858
REACTOME_PATHWAY	R-HSA-5250913~Positive epigenetic regulation of rRNA expression	9	14.5161	8.6932e-09	H2BC9, H2BC13, H2AZ2, H2BC5, CBX3, H2BC21, DDX21, H4C1, H3-3A	44	106	10538	20.3349
REACTOME_PATHWAY	R-HSA-157579~Telomere Maintenance	9	14.5161	1.44468e-08	H2BC9, H2BC13, H2AZ2, FEN1, H2BC5, H2BC21, RPA1, H4C1, H3-3A	44	113	10538	19.0752
REACTOME_PATHWAY	R-HSA-2299718~Condensation of Prophase Chromosomes	8	12.9032	1.65986e-08	H2BC9, H2BC13, H2AZ2, SET, H2BC5, H2BC21, H4C1, H3-3A	44	74	10538	25.8919
REACTOME_PATHWAY	R-HSA-427389~ERCC6 (CSB) and EHMT2 (G9a) positively regulate rRNA expression	8	12.9032	2.00437e-08	H2BC9, H2BC13, H2AZ2, H2BC5, CBX3, H2BC21, H4C1, H3-3A	44	76	10538	25.2105
REACTOME_PATHWAY	R-HSA-912446~Meiotic recombination	8	12.9032	4.78057e-08	H2BC9, H2BC13, H2AZ2, H2BC5, H2BC21, RPA1, H4C1, H3-3A	44	86	10538	22.2791
REACTOME_PATHWAY	R-HSA-69306~DNA Replication	10	16.129	5.53574e-08	H2BC9, H2BC13, H2AZ2, FEN1, H2BC5, H2BC21, RPA1, UBE2E1, H4C1, H3-3A	44	190	10538	12.6053
REACTOME_PATHWAY	R-HSA-73772~RNA Polymerase I Promoter Escape	8	12.9032	7.09392e-08	H2BC9, H2BC13, H2AZ2, H2BC5, CBX3, H2BC21, H4C1, H3-3A	44	91	10538	21.0549
REACTOME_PATHWAY	R-HSA-5250924~B-WICH complex positively regulates rRNA expression	8	12.9032	7.09392e-08	H2BC9, H2BC13, H2AZ2, H2BC5, H2BC21, DDX21, H4C1, H3-3A	44	91	10538	21.0549
REACTOME_PATHWAY	R-HSA-68875~Mitotic Prophase	9	14.5161	8.68692e-08	H2BC9, H2BC13, H2AZ2, SET, H2BC5, H2BC21, ENSA, H4C1, H3-3A	44	142	10538	15.1796
REACTOME_PATHWAY	R-HSA-212165~Epigenetic regulation of gene expression	9	14.5161	1.2623e-07	H2BC9, H2BC13, H2AZ2, H2BC5, CBX3, H2BC21, DDX21, H4C1, H3-3A	44	149	10538	14.4664
REACTOME_PATHWAY	R-HSA-73728~RNA Polymerase I Promoter Opening	7	11.2903	1.8363e-07	H2BC9, H2BC13, H2AZ2, H2BC5, H2BC21, H4C1, H3-3A	44	63	10538	26.6111
REACTOME_PATHWAY	R-HSA-69278~Cell Cycle, Mitotic	14	22.5806	1.96527e-07	H2BC9, H2AZ2, FEN1, SET, H2BC5, RPA1, UBE2E1, H2BC13, H2BC21, ENSA, CHMP4B, H4C1, MAPRE1, H3-3A	44	560	10538	5.9875
REACTOME_PATHWAY	R-HSA-5334118~DNA methylation	7	11.2903	2.21889e-07	H2BC9, H2BC13, H2AZ2, H2BC5, H2BC21, H4C1, H3-3A	44	65	10538	25.7923
REACTOME_PATHWAY	R-HSA-73854~RNA Polymerase I Promoter Clearance	8	12.9032	2.6342e-07	H2BC9, H2BC13, H2AZ2, H2BC5, CBX3, H2BC21, H4C1, H3-3A	44	110	10538	17.4182
REACTOME_PATHWAY	R-HSA-5625886~Activated PKN1 stimulates transcription of AR (androgen receptor) regulated genes KLK2 and KLK3	7	11.2903	2.66472e-07	H2BC9, H2BC13, H2AZ2, H2BC5, H2BC21, H4C1, H3-3A	44	67	10538	25.0224
REACTOME_PATHWAY	R-HSA-427359~SIRT1 negatively regulates rRNA expression	7	11.2903	2.91378e-07	H2BC9, H2BC13, H2AZ2, H2BC5, H2BC21, H4C1, H3-3A	44	68	10538	24.6544
REACTOME_PATHWAY	R-HSA-9670095~Inhibition of DNA recombination at telomere	7	11.2903	2.91378e-07	H2BC9, H2BC13, H2AZ2, H2BC5, H2BC21, H4C1, H3-3A	44	68	10538	24.6544
REACTOME_PATHWAY	R-HSA-2559582~Senescence-Associated Secretory Phenotype (SASP)	8	12.9032	2.98095e-07	H2BC9, H2BC13, H2AZ2, H2BC5, H2BC21, UBE2E1, H4C1, H3-3A	44	112	10538	17.1071
REACTOME_PATHWAY	R-HSA-73864~RNA Polymerase I Transcription	8	12.9032	2.98095e-07	H2BC9, H2BC13, H2AZ2, H2BC5, CBX3, H2BC21, H4C1, H3-3A	44	112	10538	17.1071
REACTOME_PATHWAY	R-HSA-1640170~Cell Cycle	15	24.1935	3.14097e-07	H2BC9, H2AZ2, NPM1, FEN1, SET, H2BC5, RPA1, UBE2E1, H2BC13, H2BC21, ENSA, CHMP4B, H4C1, MAPRE1, H3-3A	44	691	10538	5.19899
REACTOME_PATHWAY	R-HSA-68616~Assembly of the ORC complex at the origin of replication	7	11.2903	3.18166e-07	H2BC9, H2BC13, H2AZ2, H2BC5, H2BC21, H4C1, H3-3A	44	69	10538	24.2971
REACTOME_PATHWAY	R-HSA-9610379~HCMV Late Events	8	12.9032	3.7908e-07	H2BC9, H2BC13, HNRNPK, H2BC5, H2BC21, CHMP4B, H4C1, H2AC15	44	116	10538	16.5172
REACTOME_PATHWAY	R-HSA-1500620~Meiosis	8	12.9032	4.2606e-07	H2BC9, H2BC13, H2AZ2, H2BC5, H2BC21, RPA1, H4C1, H3-3A	44	118	10538	16.2373
REACTOME_PATHWAY	R-HSA-212300~PRC2 methylates histones and DNA	7	11.2903	4.46384e-07	H2BC9, H2BC13, H2AZ2, H2BC5, H2BC21, H4C1, H3-3A	44	73	10538	22.9658
REACTOME_PATHWAY	R-HSA-9710421~Defective pyroptosis	7	11.2903	4.46384e-07	H2BC9, H2BC13, H2AZ2, H2BC5, H2BC21, H4C1, H3-3A	44	73	10538	22.9658
REACTOME_PATHWAY	R-HSA-774815~Nucleosome assembly	7	11.2903	4.84306e-07	H2BC9, H2BC13, H2AZ2, NPM1, H2BC5, H2BC21, H4C1	44	74	10538	22.6554
REACTOME_PATHWAY	R-HSA-606279~Deposition of new CENPA-containing nucleosomes at the centromere	7	11.2903	4.84306e-07	H2BC9, H2BC13, H2AZ2, NPM1, H2BC5, H2BC21, H4C1	44	74	10538	22.6554
REACTOME_PATHWAY	R-HSA-68886~M Phase	12	19.3548	6.12402e-07	H2BC9, H2BC13, H2AZ2, SET, H2BC5, H2BC21, ENSA, UBE2E1, CHMP4B, H4C1, MAPRE1, H3-3A	44	418	10538	6.8756
REACTOME_PATHWAY	R-HSA-5693538~Homology Directed Repair	8	12.9032	1.23288e-06	H2BC9, H2BC13, FEN1, H2BC5, PARP1, H2BC21, RPA1, H4C1	44	138	10538	13.8841
REACTOME_PATHWAY	R-HSA-9616222~Transcriptional regulation of granulopoiesis	7	11.2903	1.55094e-06	H2BC9, H2BC13, H2AZ2, H2BC5, H2BC21, H4C1, H3-3A	44	90	10538	18.6278
REACTOME_PATHWAY	R-HSA-1474165~Reproduction	8	12.9032	1.56664e-06	H2BC9, H2BC13, H2AZ2, H2BC5, H2BC21, RPA1, H4C1, H3-3A	44	143	10538	13.3986
REACTOME_PATHWAY	R-HSA-201722~Formation of the beta-catenin:TCF transactivating complex	7	11.2903	1.65541e-06	H2BC9, H2BC13, H2AZ2, H2BC5, H2BC21, H4C1, H3-3A	44	91	10538	18.4231
REACTOME_PATHWAY	R-HSA-1912408~Pre-NOTCH Transcription and Translation	7	11.2903	1.88163e-06	H2BC9, H2BC13, H2AZ2, H2BC5, H2BC21, H4C1, H3-3A	44	93	10538	18.0269
REACTOME_PATHWAY	R-HSA-69002~DNA Replication Pre-Initiation	8	12.9032	1.88537e-06	H2BC9, H2BC13, H2AZ2, H2BC5, H2BC21, RPA1, H4C1, H3-3A	44	147	10538	13.034
REACTOME_PATHWAY	R-HSA-171306~Packaging Of Telomere Ends	6	9.67742	2.00723e-06	H2BC9, H2BC13, H2AZ2, H2BC5, H2BC21, H4C1	44	52	10538	27.6346
REACTOME_PATHWAY	R-HSA-5625740~RHO GTPases activate PKNs	7	11.2903	2.13251e-06	H2BC9, H2BC13, H2AZ2, H2BC5, H2BC21, H4C1, H3-3A	44	95	10538	17.6474
REACTOME_PATHWAY	R-HSA-9018519~Estrogen-dependent gene expression	8	12.9032	2.1586e-06	H2BC9, H2BC13, H2AZ2, DDX5, H2BC5, H2BC21, H4C1, H3-3A	44	150	10538	12.7733
REACTOME_PATHWAY	R-HSA-8936459~RUNX1 regulates genes involved in megakaryocyte differentiation and platelet function	7	11.2903	2.41005e-06	H2BC9, H2BC13, H2AZ2, H2BC5, H2BC21, H4C1, H3-3A	44	97	10538	17.2835
REACTOME_PATHWAY	R-HSA-110330~Recognition and association of DNA glycosylase with site containing an affected purine	6	9.67742	2.91481e-06	H2BC9, H2BC13, H2AZ2, H2BC5, H2BC21, H4C1	44	56	10538	25.6607
REACTOME_PATHWAY	R-HSA-73927~Depurination	6	9.67742	2.91481e-06	H2BC9, H2BC13, H2AZ2, H2BC5, H2BC21, H4C1	44	56	10538	25.6607
REACTOME_PATHWAY	R-HSA-110331~Cleavage of the damaged purine	6	9.67742	2.91481e-06	H2BC9, H2BC13, H2AZ2, H2BC5, H2BC21, H4C1	44	56	10538	25.6607
REACTOME_PATHWAY	R-HSA-9609646~HCMV Infection	8	12.9032	3.32052e-06	H2BC9, H2BC13, HNRNPK, H2BC5, H2BC21, CHMP4B, H4C1, H2AC15	44	160	10538	11.975
REACTOME_PATHWAY	R-HSA-9645723~Diseases of programmed cell death	7	11.2903	3.42459e-06	H2BC9, H2BC13, H2AZ2, H2BC5, H2BC21, H4C1, H3-3A	44	103	10538	16.2767
REACTOME_PATHWAY	R-HSA-5578749~Transcriptional regulation by small RNAs	7	11.2903	4.04893e-06	H2BC9, H2BC13, H2AZ2, H2BC5, H2BC21, H4C1, H3-3A	44	106	10538	15.816
REACTOME_PATHWAY	R-HSA-427413~NoRC negatively regulates rRNA expression	7	11.2903	4.27652e-06	H2BC9, H2BC13, H2AZ2, H2BC5, H2BC21, H4C1, H3-3A	44	107	10538	15.6682
REACTOME_PATHWAY	R-HSA-5693532~DNA Double-Strand Break Repair	8	12.9032	4.41246e-06	H2BC9, H2BC13, FEN1, H2BC5, PARP1, H2BC21, RPA1, H4C1	44	167	10538	11.4731
REACTOME_PATHWAY	R-HSA-73928~Depyrimidination	6	9.67742	4.47185e-06	H2BC9, H2BC13, H2AZ2, H2BC5, H2BC21, H4C1	44	61	10538	23.5574
REACTOME_PATHWAY	R-HSA-110329~Cleavage of the damaged pyrimidine	6	9.67742	4.47185e-06	H2BC9, H2BC13, H2AZ2, H2BC5, H2BC21, H4C1	44	61	10538	23.5574
REACTOME_PATHWAY	R-HSA-110328~Recognition and association of DNA glycosylase with site containing an affected pyrimidine	6	9.67742	4.47185e-06	H2BC9, H2BC13, H2AZ2, H2BC5, H2BC21, H4C1	44	61	10538	23.5574
REACTOME_PATHWAY	R-HSA-1912422~Pre-NOTCH Expression and Processing	7	11.2903	4.76299e-06	H2BC9, H2BC13, H2AZ2, H2BC5, H2BC21, H4C1, H3-3A	44	109	10538	15.3807
REACTOME_PATHWAY	R-HSA-5250941~Negative epigenetic regulation of rRNA expression	7	11.2903	5.02258e-06	H2BC9, H2BC13, H2AZ2, H2BC5, H2BC21, H4C1, H3-3A	44	110	10538	15.2409
REACTOME_PATHWAY	R-HSA-73929~Base-Excision Repair, AP Site Formation	6	9.67742	5.25172e-06	H2BC9, H2BC13, H2AZ2, H2BC5, H2BC21, H4C1	44	63	10538	22.8095
REACTOME_PATHWAY	R-HSA-73894~DNA Repair	10	16.129	6.46291e-06	H2BC9, H2BC13, H2AZ2, FEN1, H2BC5, PARP1, H2BC21, RPA1, H4C1, HMGN1	44	335	10538	7.14925
REACTOME_PATHWAY	R-HSA-3108232~SUMO E3 ligases SUMOylate target proteins	8	12.9032	7.78316e-06	DDX17, NPM1, DDX5, HNRNPK, PARP1, RPA1, H4C1, HNRNPC	44	182	10538	10.5275
REACTOME_PATHWAY	R-HSA-5617472~Activation of anterior HOX genes in hindbrain development during early embryogenesis	7	11.2903	8.71786e-06	H2BC9, H2BC13, H2AZ2, H2BC5, H2BC21, H4C1, H3-3A	44	121	10538	13.8554
REACTOME_PATHWAY	R-HSA-5619507~Activation of HOX genes during differentiation	7	11.2903	8.71786e-06	H2BC9, H2BC13, H2AZ2, H2BC5, H2BC21, H4C1, H3-3A	44	121	10538	13.8554
REACTOME_PATHWAY	R-HSA-2990846~SUMOylation	8	12.9032	9.62822e-06	DDX17, NPM1, DDX5, HNRNPK, PARP1, RPA1, H4C1, HNRNPC	44	188	10538	10.1915
REACTOME_PATHWAY	R-HSA-2559580~Oxidative Stress Induced Senescence	7	11.2903	1.0512e-05	H2BC9, H2BC13, H2AZ2, H2BC5, H2BC21, H4C1, H3-3A	44	125	10538	13.412
REACTOME_PATHWAY	R-HSA-2559583~Cellular Senescence	8	12.9032	1.30674e-05	H2BC9, H2BC13, H2AZ2, H2BC5, H2BC21, UBE2E1, H4C1, H3-3A	44	197	10538	9.72589
REACTOME_PATHWAY	R-HSA-68867~Assembly of the pre-replicative complex	7	11.2903	1.31639e-05	H2BC9, H2BC13, H2AZ2, H2BC5, H2BC21, H4C1, H3-3A	44	130	10538	12.8962
REACTOME_PATHWAY	R-HSA-8939236~RUNX1 regulates transcription of genes involved in differentiation of HSCs	7	11.2903	1.31639e-05	H2BC9, H2BC13, H2AZ2, H2BC5, H2BC21, H4C1, H3-3A	44	130	10538	12.8962
REACTOME_PATHWAY	R-HSA-1221632~Meiotic synapsis	6	9.67742	1.60477e-05	H2BC9, H2BC13, H2AZ2, H2BC5, H2BC21, H4C1	44	79	10538	18.1899
REACTOME_PATHWAY	R-HSA-2559586~DNA Damage/Telomere Stress Induced Senescence	6	9.67742	1.70661e-05	H2BC9, H2BC13, H2AZ2, H2BC5, H2BC21, H4C1	44	80	10538	17.9625
REACTOME_PATHWAY	R-HSA-211000~Gene Silencing by RNA	7	11.2903	1.85134e-05	H2BC9, H2BC13, H2AZ2, H2BC5, H2BC21, H4C1, H3-3A	44	138	10538	12.1486
REACTOME_PATHWAY	R-HSA-8939211~ESR-mediated signaling	8	12.9032	2.9142e-05	H2BC9, H2BC13, H2AZ2, DDX5, H2BC5, H2BC21, H4C1, H3-3A	44	223	10538	8.59193
REACTOME_PATHWAY	R-HSA-5663205~Infectious disease	14	22.5806	3.05183e-05	H2BC9, NPM1, DDX5, FEN1, SUPT16H, H2BC5, PARP1, SSRP1, H2AC15, H2BC13, HNRNPK, H2BC21, CHMP4B, H4C1	44	881	10538	3.8059
REACTOME_PATHWAY	R-HSA-3214815~HDACs deacetylate histones	6	9.67742	3.73598e-05	H2BC9, H2BC13, H2BC5, H2BC21, H4C1, H2AC15	44	94	10538	15.2872
REACTOME_PATHWAY	R-HSA-69473~G2/M DNA damage checkpoint	6	9.67742	3.93169e-05	H2BC9, H2BC13, H2BC5, H2BC21, RPA1, H4C1	44	95	10538	15.1263
REACTOME_PATHWAY	R-HSA-5693607~Processing of DNA double-strand break ends	6	9.67742	4.56684e-05	H2BC9, H2BC13, H2BC5, H2BC21, RPA1, H4C1	44	98	10538	14.6633
REACTOME_PATHWAY	R-HSA-977225~Amyloid fiber formation	6	9.67742	8.28821e-05	H2BC9, H2BC13, H2BC5, H2BC21, H4C1, H3-3A	44	111	10538	12.9459
REACTOME_PATHWAY	R-HSA-74160~Gene expression (Transcription)	17	27.4194	0.000157045	H2BC9, H2AZ2, NPM1, SUPT16H, SSB, H2BC5, PARP1, CBX3, RPA1, UBE2E1, DDX21, SSRP1, H2BC13, H2BC21, SNRPE, H4C1, H3-3A	44	1502	10538	2.71072
REACTOME_PATHWAY	R-HSA-69620~Cell Cycle Checkpoints	8	12.9032	0.000163152	H2BC9, H2BC13, H2BC5, H2BC21, RPA1, UBE2E1, H4C1, MAPRE1	44	293	10538	6.53925
REACTOME_PATHWAY	R-HSA-1643685~Disease	18	29.0323	0.000163256	H2BC9, H2AZ2, NPM1, DDX5, FEN1, SUPT16H, H2BC5, PARP1, UBE2E1, HMGB1, SSRP1, H2AC15, H2BC13, HNRNPK, H2BC21, CHMP4B, H4C1, H3-3A	44	1676	10538	2.5722
REACTOME_PATHWAY	R-HSA-5693571~Nonhomologous End-Joining (NHEJ)	5	8.06452	0.00017137	H2BC9, H2BC13, H2BC5, H2BC21, H4C1	44	69	10538	17.3551
REACTOME_PATHWAY	R-HSA-9006931~Signaling by Nuclear Receptors	8	12.9032	0.000184915	H2BC9, H2BC13, H2AZ2, DDX5, H2BC5, H2BC21, H4C1, H3-3A	44	299	10538	6.40803
REACTOME_PATHWAY	R-HSA-5693567~HDR through Homologous Recombination (HRR) or Single Strand Annealing (SSA)	6	9.67742	0.000187788	H2BC9, H2BC13, H2BC5, H2BC21, RPA1, H4C1	44	132	10538	10.8864
REACTOME_PATHWAY	R-HSA-9609690~HCMV Early Events	6	9.67742	0.000208592	H2BC9, H2BC13, H2BC5, H2BC21, H4C1, H2AC15	44	135	10538	10.6444
REACTOME_PATHWAY	R-HSA-5693565~Recruitment and ATM-mediated phosphorylation of repair and signaling proteins at DNA double strand breaks	5	8.06452	0.000261989	H2BC9, H2BC13, H2BC5, H2BC21, H4C1	44	77	10538	15.5519
REACTOME_PATHWAY	R-HSA-3214847~HATs acetylate histones	6	9.67742	0.000263967	H2BC9, H2BC13, H2BC5, H2BC21, H4C1, H2AC15	44	142	10538	10.1197
REACTOME_PATHWAY	R-HSA-5693606~DNA Double Strand Break Response	5	8.06452	0.000275336	H2BC9, H2BC13, H2BC5, H2BC21, H4C1	44	78	10538	15.3526
REACTOME_PATHWAY	R-HSA-195258~RHO GTPase Effectors	8	12.9032	0.000319876	H2BC9, H2BC13, H2AZ2, H2BC5, H2BC21, H4C1, MAPRE1, H3-3A	44	327	10538	5.85933
REACTOME_PATHWAY	R-HSA-201681~TCF dependent signaling in response to WNT	7	11.2903	0.000336702	H2BC9, H2BC13, H2AZ2, H2BC5, H2BC21, H4C1, H3-3A	44	233	10538	7.19528
REACTOME_PATHWAY	R-HSA-157118~Signaling by NOTCH	7	11.2903	0.00036058	H2BC9, H2BC13, H2AZ2, H2BC5, H2BC21, H4C1, H3-3A	44	236	10538	7.10381
REACTOME_PATHWAY	R-HSA-8878171~Transcriptional regulation by RUNX1	7	11.2903	0.000385769	H2BC9, H2BC13, H2AZ2, H2BC5, H2BC21, H4C1, H3-3A	44	239	10538	7.01464
REACTOME_PATHWAY	R-HSA-69481~G2/M Checkpoints	6	9.67742	0.000556829	H2BC9, H2BC13, H2BC5, H2BC21, RPA1, H4C1	44	167	10538	8.60479
REACTOME_PATHWAY	R-HSA-73857~RNA Polymerase II Transcription	15	24.1935	0.000691509	H2BC9, H2AZ2, NPM1, SUPT16H, H2BC5, PARP1, CBX3, RPA1, UBE2E1, SSRP1, H2BC13, H2BC21, SNRPE, H4C1, H3-3A	44	1362	10538	2.63767
REACTOME_PATHWAY	R-HSA-4839726~Chromatin organization	7	11.2903	0.000794294	H2BC9, H2BC13, H2AZ2, H2BC5, H2BC21, H4C1, H2AC15	44	274	10538	6.11861
REACTOME_PATHWAY	R-HSA-3247509~Chromatin modifying enzymes	7	11.2903	0.000794294	H2BC9, H2BC13, H2AZ2, H2BC5, H2BC21, H4C1, H2AC15	44	274	10538	6.11861
REACTOME_PATHWAY	R-HSA-212436~Generic Transcription Pathway	14	22.5806	0.000946223	H2BC9, H2AZ2, NPM1, SUPT16H, H2BC5, PARP1, CBX3, RPA1, UBE2E1, SSRP1, H2BC13, H2BC21, H4C1, H3-3A	44	1239	10538	2.70621
